# Supplementary material
Source: publisher figshare collection journal article supplement (https://acs.figshare.com/ndownloader/files/3863956)

**U of M****University of Minnesota Department of Chemistry****Mass Spectrometry Service Laboratory**

email: chmmslab@umn.edu

**Submit Sample To:** Mass Spectrometry Facility  
207 Pleasant St. SE  
Minneapolis, MN 55455  
Phone: (612)-625-8099  
FAX: (612)-626-7541

| Name: Zhongda Pan                                                                                                                                                                                                                                                               |  | Phone: 612 481 7665                                                                                                                                                                                                                                                                             |    | Date: 03/04/13                 |       |     |    |    |       |     |                             |  |  |      |  |                               |  |  |      |   |  |  |  |
|---------------------------------------------------------------------------------------------------------------------------------------------------------------------------------------------------------------------------------------------------------------------------------|--|-------------------------------------------------------------------------------------------------------------------------------------------------------------------------------------------------------------------------------------------------------------------------------------------------|----|--------------------------------|-------|-----|----|----|-------|-----|-----------------------------|--|--|------|--|-------------------------------|--|--|------|---|--|--|--|
| Email: panxx160@umn.edu                                                                                                                                                                                                                                                         |  | Email Results? Yes                                                                                                                                                                                                                                                                              |    | FAX: FAX Results? Y / N        |       |     |    |    |       |     |                             |  |  |      |  |                               |  |  |      |   |  |  |  |
| P.I./Advisor: Chris Douglas                                                                                                                                                                                                                                                     |  | U of M Budget # 5190022                                                                                                                                                                                                                                                                         |    |                                |       |     |    |    |       |     |                             |  |  |      |  |                               |  |  |      |   |  |  |  |
| Company/University:                                                                                                                                                                                                                                                             |  | P.O.# (For non-U of M Clients)                                                                                                                                                                                                                                                                  |    |                                |       |     |    |    |       |     |                             |  |  |      |  |                               |  |  |      |   |  |  |  |
| Shipping Address:                                                                                                                                                                                                                                                               |  | Billing Address:                                                                                                                                                                                                                                                                                |    |                                |       |     |    |    |       |     |                             |  |  |      |  |                               |  |  |      |   |  |  |  |
| Sample Label: 5a                                                                                                                                                                                                                                                                |  | Molecular Weight: 164.2011                                                                                                                                                                                                                                                                      |    |                                |       |     |    |    |       |     |                             |  |  |      |  |                               |  |  |      |   |  |  |  |
| 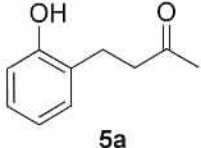<br>5a                                                                                                                                                                                         |  | Molecular Formula: C <sub>10</sub> H <sub>12</sub> O <sub>2</sub>                                                                                                                                                                                                                               |    |                                |       |     |    |    |       |     |                             |  |  |      |  |                               |  |  |      |   |  |  |  |
|                                                                                                                                                                                                                                                                                 |  | Melting/Boiling Point: N/A                                                                                                                                                                                                                                                                      |    |                                |       |     |    |    |       |     |                             |  |  |      |  |                               |  |  |      |   |  |  |  |
|                                                                                                                                                                                                                                                                                 |  | Solubility: DCM, CH <sub>3</sub> CN, MeOH, EA                                                                                                                                                                                                                                                   |    |                                |       |     |    |    |       |     |                             |  |  |      |  |                               |  |  |      |   |  |  |  |
|                                                                                                                                                                                                                                                                                 |  | Thermal Stability: Yes                                                                                                                                                                                                                                                                          |    |                                |       |     |    |    |       |     |                             |  |  |      |  |                               |  |  |      |   |  |  |  |
|                                                                                                                                                                                                                                                                                 |  | Toxicity: NO                                                                                                                                                                                                                                                                                    |    |                                |       |     |    |    |       |     |                             |  |  |      |  |                               |  |  |      |   |  |  |  |
| <b>Chromatography Conditions:</b>                                                                                                                                                                                                                                               |  | <b>Analysis Requested</b>                                                                                                                                                                                                                                                                       |    |                                |       |     |    |    |       |     |                             |  |  |      |  |                               |  |  |      |   |  |  |  |
|                                                                                                                                                                                                                                                                                 |  | <table border="1"><thead><tr><th></th><th>EI</th><th>CI</th><th>MALDI</th><th>ESI</th></tr></thead><tbody><tr><td>Low Resolution Nominal Mass</td><td></td><td></td><td></td><td></td></tr><tr><td>High Resolution Accurate Mass</td><td></td><td></td><td></td><td>✓</td></tr></tbody></table> |    |                                |       |     | EI | CI | MALDI | ESI | Low Resolution Nominal Mass |  |  |      |  | High Resolution Accurate Mass |  |  |      | ✓ |  |  |  |
|                                                                                                                                                                                                                                                                                 |  |                                                                                                                                                                                                                                                                                                 | EI | CI                             | MALDI | ESI |    |    |       |     |                             |  |  |      |  |                               |  |  |      |   |  |  |  |
|                                                                                                                                                                                                                                                                                 |  | Low Resolution Nominal Mass                                                                                                                                                                                                                                                                     |    |                                |       |     |    |    |       |     |                             |  |  |      |  |                               |  |  |      |   |  |  |  |
|                                                                                                                                                                                                                                                                                 |  | High Resolution Accurate Mass                                                                                                                                                                                                                                                                   |    |                                |       | ✓   |    |    |       |     |                             |  |  |      |  |                               |  |  |      |   |  |  |  |
| <b>Special Sample Considerations:</b>                                                                                                                                                                                                                                           |  |                                                                                                                                                                                                                                                                                                 |    |                                |       |     |    |    |       |     |                             |  |  |      |  |                               |  |  |      |   |  |  |  |
| <table border="1"><tbody><tr><td>+Ve</td><td></td><td></td><td></td><td></td></tr><tr><td>-Ve</td><td></td><td></td><td></td><td></td></tr><tr><td>GCMS</td><td></td><td></td><td></td><td></td></tr><tr><td>LCMS</td><td></td><td></td><td></td><td></td></tr></tbody></table> |  |                                                                                                                                                                                                                                                                                                 |    | +Ve                            |       |     |    |    | -Ve   |     |                             |  |  | GCMS |  |                               |  |  | LCMS |   |  |  |  |
| +Ve                                                                                                                                                                                                                                                                             |  |                                                                                                                                                                                                                                                                                                 |    |                                |       |     |    |    |       |     |                             |  |  |      |  |                               |  |  |      |   |  |  |  |
| -Ve                                                                                                                                                                                                                                                                             |  |                                                                                                                                                                                                                                                                                                 |    |                                |       |     |    |    |       |     |                             |  |  |      |  |                               |  |  |      |   |  |  |  |
| GCMS                                                                                                                                                                                                                                                                            |  |                                                                                                                                                                                                                                                                                                 |    |                                |       |     |    |    |       |     |                             |  |  |      |  |                               |  |  |      |   |  |  |  |
| LCMS                                                                                                                                                                                                                                                                            |  |                                                                                                                                                                                                                                                                                                 |    |                                |       |     |    |    |       |     |                             |  |  |      |  |                               |  |  |      |   |  |  |  |
| <b>Instrument Used</b>                                                                                                                                                                                                                                                          |  | <b>Conditions Used</b>                                                                                                                                                                                                                                                                          |    | <b>Operator Comments</b>       |       |     |    |    |       |     |                             |  |  |      |  |                               |  |  |      |   |  |  |  |
| Finnigan MAT 95                                                                                                                                                                                                                                                                 |  | Source Temp:                                                                                                                                                                                                                                                                                    |    | [M+Na] <sup>+</sup> : 187.0731 |       |     |    |    |       |     |                             |  |  |      |  |                               |  |  |      |   |  |  |  |
| Bruker Reflex III                                                                                                                                                                                                                                                               |  | Acc. Voltage:                                                                                                                                                                                                                                                                                   |    |                                |       |     |    |    |       |     |                             |  |  |      |  |                               |  |  |      |   |  |  |  |
| Bruker BioTOF II                                                                                                                                                                                                                                                                |  | Resolution:                                                                                                                                                                                                                                                                                     |    |                                |       |     |    |    |       |     |                             |  |  |      |  |                               |  |  |      |   |  |  |  |
| Waters Triple Quad                                                                                                                                                                                                                                                              |  | Scan Range:                                                                                                                                                                                                                                                                                     |    |                                |       |     |    |    |       |     |                             |  |  |      |  |                               |  |  |      |   |  |  |  |
| Waters Synapt G2                                                                                                                                                                                                                                                                |  | Gas Used:                                                                                                                                                                                                                                                                                       |    |                                |       |     |    |    |       |     |                             |  |  |      |  |                               |  |  |      |   |  |  |  |
| Log #:                                                                                                                                                                                                                                                                          |  | Analyst:                                                                                                                                                                                                                                                                                        |    | Analysis Date:                 |       |     |    |    |       |     |                             |  |  |      |  |                               |  |  |      |   |  |  |  |
|                                                                                                                                                                                                                                                                                 |  |                                                                                                                                                                                                                                                                                                 |    | Analyses Run:                  |       |     |    |    |       |     |                             |  |  |      |  |                               |  |  |      |   |  |  |  |
|                                                                                                                                                                                                                                                                                 |  |                                                                                                                                                                                                                                                                                                 |    | Total Cost:                    |       |     |    |    |       |     |                             |  |  |      |  |                               |  |  |      |   |  |  |  |

100629

5a

chresi

Kyle Kalstabakken

3/11/2013 5:15:36 PM

# Display Report

## Analysis Info

Analysis Name Z:\mslab\100629\2hi\_res  
Method pos\_lowmass\_40912.tofpar  
Sample Name 100629  
Comment

Acquisition Date 3/12/2013 1:12:43 PM

Operator operator name  
Instrument BioTOF II

## Acquisition Parameter

|      |         |     |     |         |        |
|------|---------|-----|-----|---------|--------|
| n/a  | n/a     | n/a | n/a | detbias | 1750 V |
| EndP | -4000 V | n/a | n/a | n/a     | n/a    |

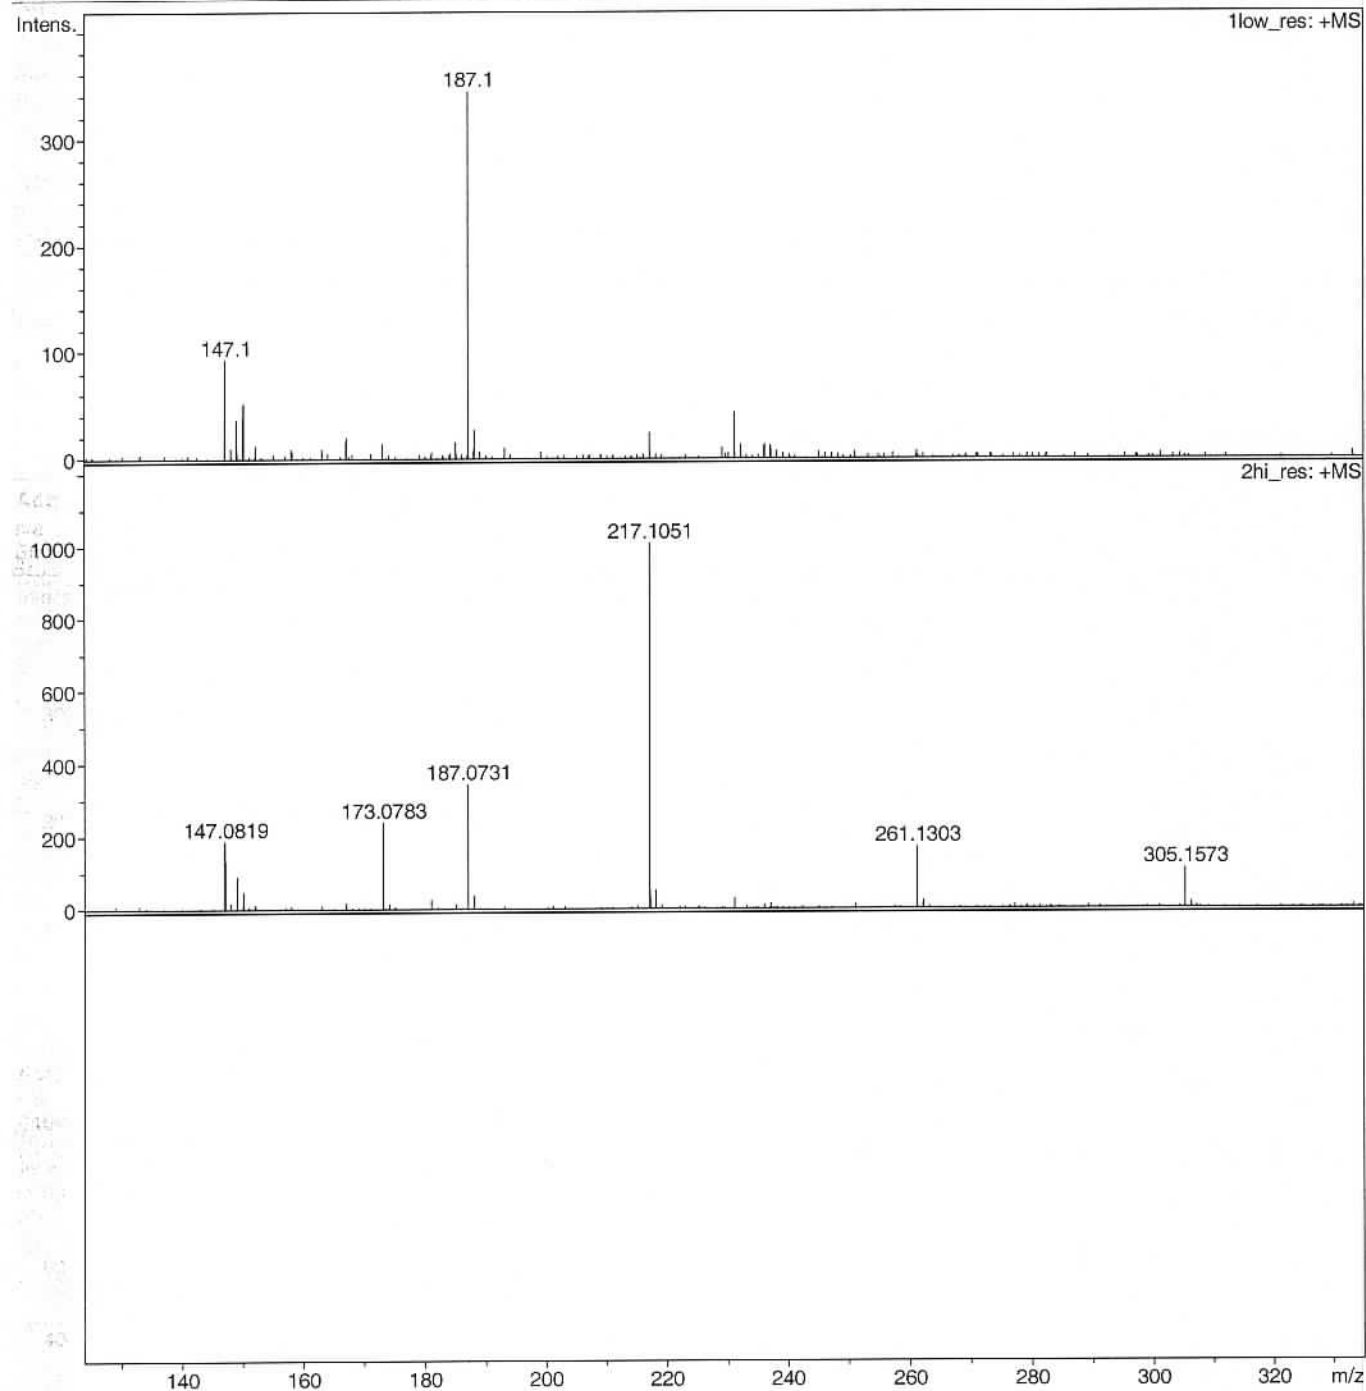

Supplement: Supplementary file 21 [file 3863956]
