# Supplementary material
Source: publisher figshare collection journal article supplement (https://acs.figshare.com/ndownloader/files/3863956)

**U of M****University of Minnesota Department of Chemistry****Mass Spectrometry Service Laboratory**

email: chmmslab@umn.edu

**Submit Sample To:** Mass Spectrometry Facility  
207 Pleasant St. SE  
Minneapolis, MN 55455  
Phone: (612)-625-8099  
FAX : (612)-626-7541

| Name: Zhongda Pan                                                                                                                                                                                                                                                               |          | Phone: 612 481 7665                                                                                                                                                                                                                                                                             |    | Date: 03/04/13                |             |     |    |    |       |     |                             |  |  |      |  |                               |  |  |      |   |  |  |  |
|---------------------------------------------------------------------------------------------------------------------------------------------------------------------------------------------------------------------------------------------------------------------------------|----------|-------------------------------------------------------------------------------------------------------------------------------------------------------------------------------------------------------------------------------------------------------------------------------------------------|----|-------------------------------|-------------|-----|----|----|-------|-----|-----------------------------|--|--|------|--|-------------------------------|--|--|------|---|--|--|--|
| Email: panxx160@umn.edu                                                                                                                                                                                                                                                         |          | Email Results? Yes                                                                                                                                                                                                                                                                              |    | FAX: FAX Results? Y / N       |             |     |    |    |       |     |                             |  |  |      |  |                               |  |  |      |   |  |  |  |
| P.I./Advisor: Chris Douglas                                                                                                                                                                                                                                                     |          | U of M Budget # 5190022                                                                                                                                                                                                                                                                         |    |                               |             |     |    |    |       |     |                             |  |  |      |  |                               |  |  |      |   |  |  |  |
| Company/University:                                                                                                                                                                                                                                                             |          | P.O.# (For non-U of M Clients)                                                                                                                                                                                                                                                                  |    |                               |             |     |    |    |       |     |                             |  |  |      |  |                               |  |  |      |   |  |  |  |
| Shipping Address:                                                                                                                                                                                                                                                               |          | Billing Address:                                                                                                                                                                                                                                                                                |    |                               |             |     |    |    |       |     |                             |  |  |      |  |                               |  |  |      |   |  |  |  |
| Sample Label: 6a                                                                                                                                                                                                                                                                |          | Molecular Weight: 162.2283                                                                                                                                                                                                                                                                      |    |                               |             |     |    |    |       |     |                             |  |  |      |  |                               |  |  |      |   |  |  |  |
| 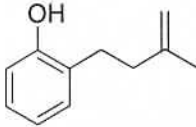<br>6a                                                                                                                                                                                         |          | Molecular Formula: C <sub>11</sub> H <sub>14</sub> O                                                                                                                                                                                                                                            |    |                               |             |     |    |    |       |     |                             |  |  |      |  |                               |  |  |      |   |  |  |  |
|                                                                                                                                                                                                                                                                                 |          | Melting/Boiling Point: N/A                                                                                                                                                                                                                                                                      |    |                               |             |     |    |    |       |     |                             |  |  |      |  |                               |  |  |      |   |  |  |  |
|                                                                                                                                                                                                                                                                                 |          | Solubility: DCM, CH <sub>3</sub> CN, MeOH, EA                                                                                                                                                                                                                                                   |    |                               |             |     |    |    |       |     |                             |  |  |      |  |                               |  |  |      |   |  |  |  |
|                                                                                                                                                                                                                                                                                 |          | Thermal Stability: Yes                                                                                                                                                                                                                                                                          |    |                               |             |     |    |    |       |     |                             |  |  |      |  |                               |  |  |      |   |  |  |  |
|                                                                                                                                                                                                                                                                                 |          | Toxicity: NO                                                                                                                                                                                                                                                                                    |    |                               |             |     |    |    |       |     |                             |  |  |      |  |                               |  |  |      |   |  |  |  |
| Reactivity: acidic proton                                                                                                                                                                                                                                                       |          |                                                                                                                                                                                                                                                                                                 |    |                               |             |     |    |    |       |     |                             |  |  |      |  |                               |  |  |      |   |  |  |  |
| <b>Chromatography Conditions:</b>                                                                                                                                                                                                                                               |          | <b>Analysis Requested</b>                                                                                                                                                                                                                                                                       |    |                               |             |     |    |    |       |     |                             |  |  |      |  |                               |  |  |      |   |  |  |  |
|                                                                                                                                                                                                                                                                                 |          | <table border="1"><thead><tr><th></th><th>EI</th><th>CI</th><th>MALDI</th><th>ESI</th></tr></thead><tbody><tr><td>Low Resolution Nominal Mass</td><td></td><td></td><td></td><td></td></tr><tr><td>High Resolution Accurate Mass</td><td></td><td></td><td></td><td>✓</td></tr></tbody></table> |    |                               |             |     | EI | CI | MALDI | ESI | Low Resolution Nominal Mass |  |  |      |  | High Resolution Accurate Mass |  |  |      | ✓ |  |  |  |
|                                                                                                                                                                                                                                                                                 |          |                                                                                                                                                                                                                                                                                                 | EI | CI                            | MALDI       | ESI |    |    |       |     |                             |  |  |      |  |                               |  |  |      |   |  |  |  |
|                                                                                                                                                                                                                                                                                 |          | Low Resolution Nominal Mass                                                                                                                                                                                                                                                                     |    |                               |             |     |    |    |       |     |                             |  |  |      |  |                               |  |  |      |   |  |  |  |
| High Resolution Accurate Mass                                                                                                                                                                                                                                                   |          |                                                                                                                                                                                                                                                                                                 |    | ✓                             |             |     |    |    |       |     |                             |  |  |      |  |                               |  |  |      |   |  |  |  |
| <b>Special Sample Considerations:</b>                                                                                                                                                                                                                                           |          |                                                                                                                                                                                                                                                                                                 |    |                               |             |     |    |    |       |     |                             |  |  |      |  |                               |  |  |      |   |  |  |  |
| <table border="1"><tbody><tr><td>+Ve</td><td></td><td></td><td></td><td></td></tr><tr><td>-Ve</td><td></td><td></td><td></td><td></td></tr><tr><td>GCMS</td><td></td><td></td><td></td><td></td></tr><tr><td>LCMS</td><td></td><td></td><td></td><td></td></tr></tbody></table> |          |                                                                                                                                                                                                                                                                                                 |    | +Ve                           |             |     |    |    | -Ve   |     |                             |  |  | GCMS |  |                               |  |  | LCMS |   |  |  |  |
| +Ve                                                                                                                                                                                                                                                                             |          |                                                                                                                                                                                                                                                                                                 |    |                               |             |     |    |    |       |     |                             |  |  |      |  |                               |  |  |      |   |  |  |  |
| -Ve                                                                                                                                                                                                                                                                             |          |                                                                                                                                                                                                                                                                                                 |    |                               |             |     |    |    |       |     |                             |  |  |      |  |                               |  |  |      |   |  |  |  |
| GCMS                                                                                                                                                                                                                                                                            |          |                                                                                                                                                                                                                                                                                                 |    |                               |             |     |    |    |       |     |                             |  |  |      |  |                               |  |  |      |   |  |  |  |
| LCMS                                                                                                                                                                                                                                                                            |          |                                                                                                                                                                                                                                                                                                 |    |                               |             |     |    |    |       |     |                             |  |  |      |  |                               |  |  |      |   |  |  |  |
| <b>Instrument Used</b>                                                                                                                                                                                                                                                          |          | <b>Conditions Used</b>                                                                                                                                                                                                                                                                          |    | <b>Operator Comments</b>      |             |     |    |    |       |     |                             |  |  |      |  |                               |  |  |      |   |  |  |  |
| Finnigan MAT 95                                                                                                                                                                                                                                                                 |          | Source Temp:                                                                                                                                                                                                                                                                                    |    | [M-H] <sup>-</sup> : 161.0968 |             |     |    |    |       |     |                             |  |  |      |  |                               |  |  |      |   |  |  |  |
| Bruker Reflex III                                                                                                                                                                                                                                                               |          | Acc. Voltage:                                                                                                                                                                                                                                                                                   |    |                               |             |     |    |    |       |     |                             |  |  |      |  |                               |  |  |      |   |  |  |  |
| Bruker BioTOF II                                                                                                                                                                                                                                                                |          | Resolution:                                                                                                                                                                                                                                                                                     |    |                               |             |     |    |    |       |     |                             |  |  |      |  |                               |  |  |      |   |  |  |  |
| Waters Triple Quad                                                                                                                                                                                                                                                              |          | Scan Range:                                                                                                                                                                                                                                                                                     |    |                               |             |     |    |    |       |     |                             |  |  |      |  |                               |  |  |      |   |  |  |  |
| Waters Synapt G2                                                                                                                                                                                                                                                                |          | Gas Used:                                                                                                                                                                                                                                                                                       |    |                               |             |     |    |    |       |     |                             |  |  |      |  |                               |  |  |      |   |  |  |  |
| Log #:                                                                                                                                                                                                                                                                          | Analyst: | Analysis Date:                                                                                                                                                                                                                                                                                  |    | Analyses Run:                 | Total Cost: |     |    |    |       |     |                             |  |  |      |  |                               |  |  |      |   |  |  |  |

100643

6a

chresi

Kyle Kalstabakken

3/12/2013 12:58:35 PM

# Display Report

## Analysis Info

Analysis Name Z:\mslab\100643\5hi\_res  
Method negative\_041013.tofpar  
Sample Name 100643  
Comment

Acquisition Date 4/12/2013 10:58:01 AM

Operator operator name  
Instrument BioTOF II

## Acquisition Parameter

|      |        |     |     |         |        |
|------|--------|-----|-----|---------|--------|
| n/a  | n/a    | n/a | n/a | detbias | 1800 V |
| EndP | 3000 V | n/a | n/a | n/a     | n/a    |

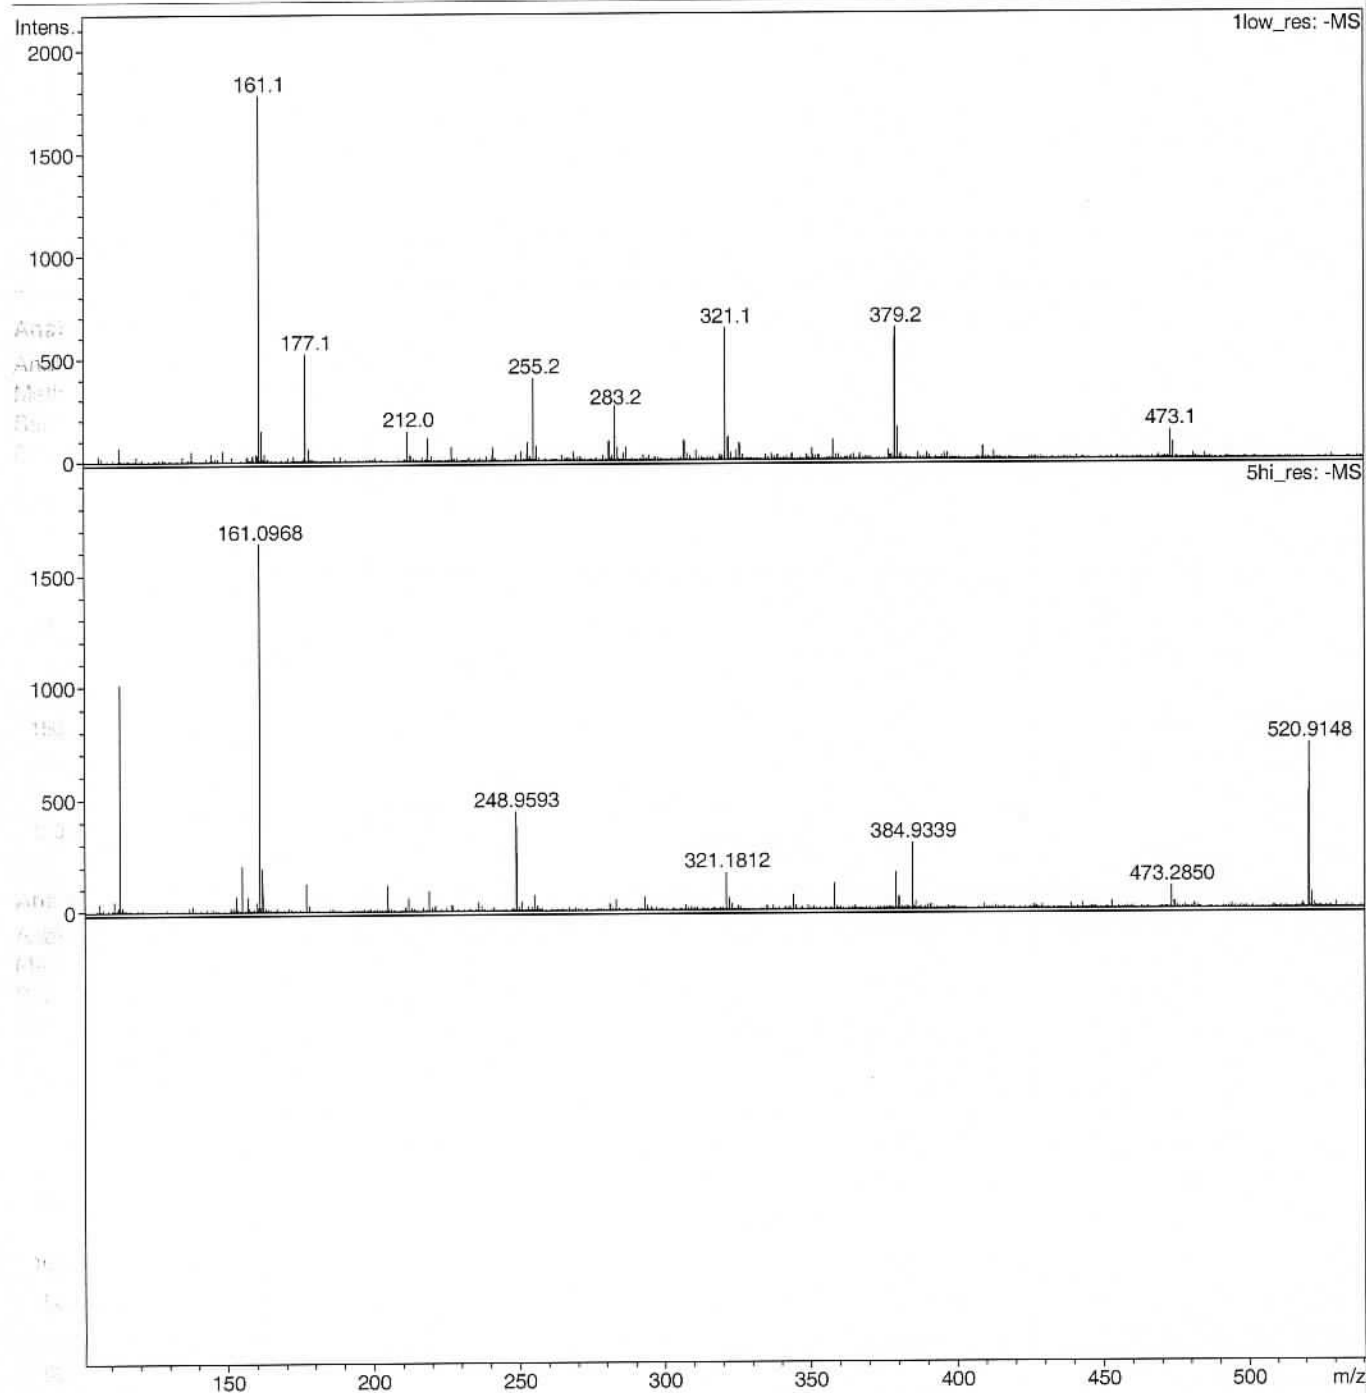

**U of M****University of Minnesota Department of Chemistry****Mass Spectrometry Service Laboratory**

email: chmmslab@umn.edu

**Submit Sample To:** Mass Spectrometry Facility  
207 Pleasant St. SE  
Minneapolis, MN 55455  
Phone: (612)-625-8099  
FAX: (612)-626-7541

| Name: Zhongda Pan                                                                        |          | Phone: 612 481 7665                                                                                                                                                                                                                                                                             |       | Date: 03/04/13                |             |     |    |    |       |     |                             |  |  |  |  |                               |  |  |  |   |      |  |  |  |  |
|------------------------------------------------------------------------------------------|----------|-------------------------------------------------------------------------------------------------------------------------------------------------------------------------------------------------------------------------------------------------------------------------------------------------|-------|-------------------------------|-------------|-----|----|----|-------|-----|-----------------------------|--|--|--|--|-------------------------------|--|--|--|---|------|--|--|--|--|
| Email: panxx160@umn.edu                                                                  |          | Email Results? Yes                                                                                                                                                                                                                                                                              |       | FAX: FAX Results? Y / N       |             |     |    |    |       |     |                             |  |  |  |  |                               |  |  |  |   |      |  |  |  |  |
| P.I./Advisor: Chris Douglas                                                              |          | U of M Budget # 5190022                                                                                                                                                                                                                                                                         |       |                               |             |     |    |    |       |     |                             |  |  |  |  |                               |  |  |  |   |      |  |  |  |  |
| Company/University:                                                                      |          | P.O.# (For non-U of M Clients)                                                                                                                                                                                                                                                                  |       |                               |             |     |    |    |       |     |                             |  |  |  |  |                               |  |  |  |   |      |  |  |  |  |
| Shipping Address:                                                                        |          | Billing Address:                                                                                                                                                                                                                                                                                |       |                               |             |     |    |    |       |     |                             |  |  |  |  |                               |  |  |  |   |      |  |  |  |  |
| Sample Label: 1d                                                                         |          | Molecular Weight: 316.7788                                                                                                                                                                                                                                                                      |       |                               |             |     |    |    |       |     |                             |  |  |  |  |                               |  |  |  |   |      |  |  |  |  |
| 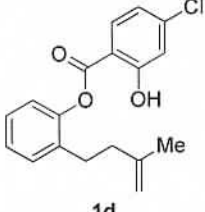<br>1d |          | Molecular Formula: C <sub>18</sub> H <sub>17</sub> ClO <sub>3</sub>                                                                                                                                                                                                                             |       |                               |             |     |    |    |       |     |                             |  |  |  |  |                               |  |  |  |   |      |  |  |  |  |
|                                                                                          |          | Melting/Boiling Point: N/A                                                                                                                                                                                                                                                                      |       |                               |             |     |    |    |       |     |                             |  |  |  |  |                               |  |  |  |   |      |  |  |  |  |
|                                                                                          |          | Solubility: DCM, CH <sub>3</sub> CN, MeOH, EA                                                                                                                                                                                                                                                   |       |                               |             |     |    |    |       |     |                             |  |  |  |  |                               |  |  |  |   |      |  |  |  |  |
|                                                                                          |          | Thermal Stability: Yes                                                                                                                                                                                                                                                                          |       |                               |             |     |    |    |       |     |                             |  |  |  |  |                               |  |  |  |   |      |  |  |  |  |
|                                                                                          |          | Toxicity: NO                                                                                                                                                                                                                                                                                    |       |                               |             |     |    |    |       |     |                             |  |  |  |  |                               |  |  |  |   |      |  |  |  |  |
| Reactivity: acidic proton                                                                |          |                                                                                                                                                                                                                                                                                                 |       |                               |             |     |    |    |       |     |                             |  |  |  |  |                               |  |  |  |   |      |  |  |  |  |
| <b>Chromatography Conditions:</b>                                                        |          | <b>Analysis Requested</b>                                                                                                                                                                                                                                                                       |       |                               |             |     |    |    |       |     |                             |  |  |  |  |                               |  |  |  |   |      |  |  |  |  |
|                                                                                          |          | <table border="1"><thead><tr><th></th><th>EI</th><th>CI</th><th>MALDI</th><th>ESI</th></tr></thead><tbody><tr><td>Low Resolution Nominal Mass</td><td></td><td></td><td></td><td></td></tr><tr><td>High Resolution Accurate Mass</td><td></td><td></td><td></td><td>✓</td></tr></tbody></table> |       |                               |             |     | EI | CI | MALDI | ESI | Low Resolution Nominal Mass |  |  |  |  | High Resolution Accurate Mass |  |  |  | ✓ |      |  |  |  |  |
|                                                                                          | EI       | CI                                                                                                                                                                                                                                                                                              | MALDI | ESI                           |             |     |    |    |       |     |                             |  |  |  |  |                               |  |  |  |   |      |  |  |  |  |
| Low Resolution Nominal Mass                                                              |          |                                                                                                                                                                                                                                                                                                 |       |                               |             |     |    |    |       |     |                             |  |  |  |  |                               |  |  |  |   |      |  |  |  |  |
| High Resolution Accurate Mass                                                            |          |                                                                                                                                                                                                                                                                                                 |       | ✓                             |             |     |    |    |       |     |                             |  |  |  |  |                               |  |  |  |   |      |  |  |  |  |
| <b>Special Sample Considerations:</b>                                                    |          |                                                                                                                                                                                                                                                                                                 |       |                               |             |     |    |    |       |     |                             |  |  |  |  |                               |  |  |  |   |      |  |  |  |  |
|                                                                                          |          | <table border="1"><tbody><tr><td>+Ve</td><td></td><td></td><td></td><td></td></tr><tr><td>-Ve</td><td></td><td></td><td></td><td></td></tr><tr><td>GCMS</td><td></td><td></td><td></td><td></td></tr><tr><td>LCMS</td><td></td><td></td><td></td><td></td></tr></tbody></table>                 |       |                               |             | +Ve |    |    |       |     | -Ve                         |  |  |  |  | GCMS                          |  |  |  |   | LCMS |  |  |  |  |
| +Ve                                                                                      |          |                                                                                                                                                                                                                                                                                                 |       |                               |             |     |    |    |       |     |                             |  |  |  |  |                               |  |  |  |   |      |  |  |  |  |
| -Ve                                                                                      |          |                                                                                                                                                                                                                                                                                                 |       |                               |             |     |    |    |       |     |                             |  |  |  |  |                               |  |  |  |   |      |  |  |  |  |
| GCMS                                                                                     |          |                                                                                                                                                                                                                                                                                                 |       |                               |             |     |    |    |       |     |                             |  |  |  |  |                               |  |  |  |   |      |  |  |  |  |
| LCMS                                                                                     |          |                                                                                                                                                                                                                                                                                                 |       |                               |             |     |    |    |       |     |                             |  |  |  |  |                               |  |  |  |   |      |  |  |  |  |
| <b>Instrument Used</b>                                                                   |          | <b>Conditions Used</b>                                                                                                                                                                                                                                                                          |       | <b>Operator Comments</b>      |             |     |    |    |       |     |                             |  |  |  |  |                               |  |  |  |   |      |  |  |  |  |
| Finnigan MAT 95                                                                          |          | Source Temp:                                                                                                                                                                                                                                                                                    |       | [M-H] <sup>-</sup> : 315.0794 |             |     |    |    |       |     |                             |  |  |  |  |                               |  |  |  |   |      |  |  |  |  |
| Bruker Reflex III                                                                        |          | Acc. Voltage:                                                                                                                                                                                                                                                                                   |       |                               |             |     |    |    |       |     |                             |  |  |  |  |                               |  |  |  |   |      |  |  |  |  |
| Bruker BioTOF II                                                                         |          | Resolution:                                                                                                                                                                                                                                                                                     |       |                               |             |     |    |    |       |     |                             |  |  |  |  |                               |  |  |  |   |      |  |  |  |  |
| Waters Triple Quad                                                                       |          | Scan Range:                                                                                                                                                                                                                                                                                     |       |                               |             |     |    |    |       |     |                             |  |  |  |  |                               |  |  |  |   |      |  |  |  |  |
| Waters Synapt G2                                                                         |          | Gas Used:                                                                                                                                                                                                                                                                                       |       |                               |             |     |    |    |       |     |                             |  |  |  |  |                               |  |  |  |   |      |  |  |  |  |
| Log #:                                                                                   | Analyst: | Analysis Date:                                                                                                                                                                                                                                                                                  |       | Analyses Run:                 | Total Cost: |     |    |    |       |     |                             |  |  |  |  |                               |  |  |  |   |      |  |  |  |  |

100644

1d

chresi

Kyle Kalstabakken

3/12/2013 12:59:38 PM

# Display Report

## Analysis Info

Analysis Name Z:\mslab\100644\6hi\_res  
Method negative\_041013.tofpar  
Sample Name 100644  
Comment

Acquisition Date 4/11/2013 5:19:07 PM

Operator operator name  
Instrument BioTOF II

## Acquisition Parameter

|      |        |     |     |         |        |
|------|--------|-----|-----|---------|--------|
| n/a  | n/a    | n/a | n/a | detbias | 1800 V |
| EndP | 3000 V | n/a | n/a | n/a     | n/a    |

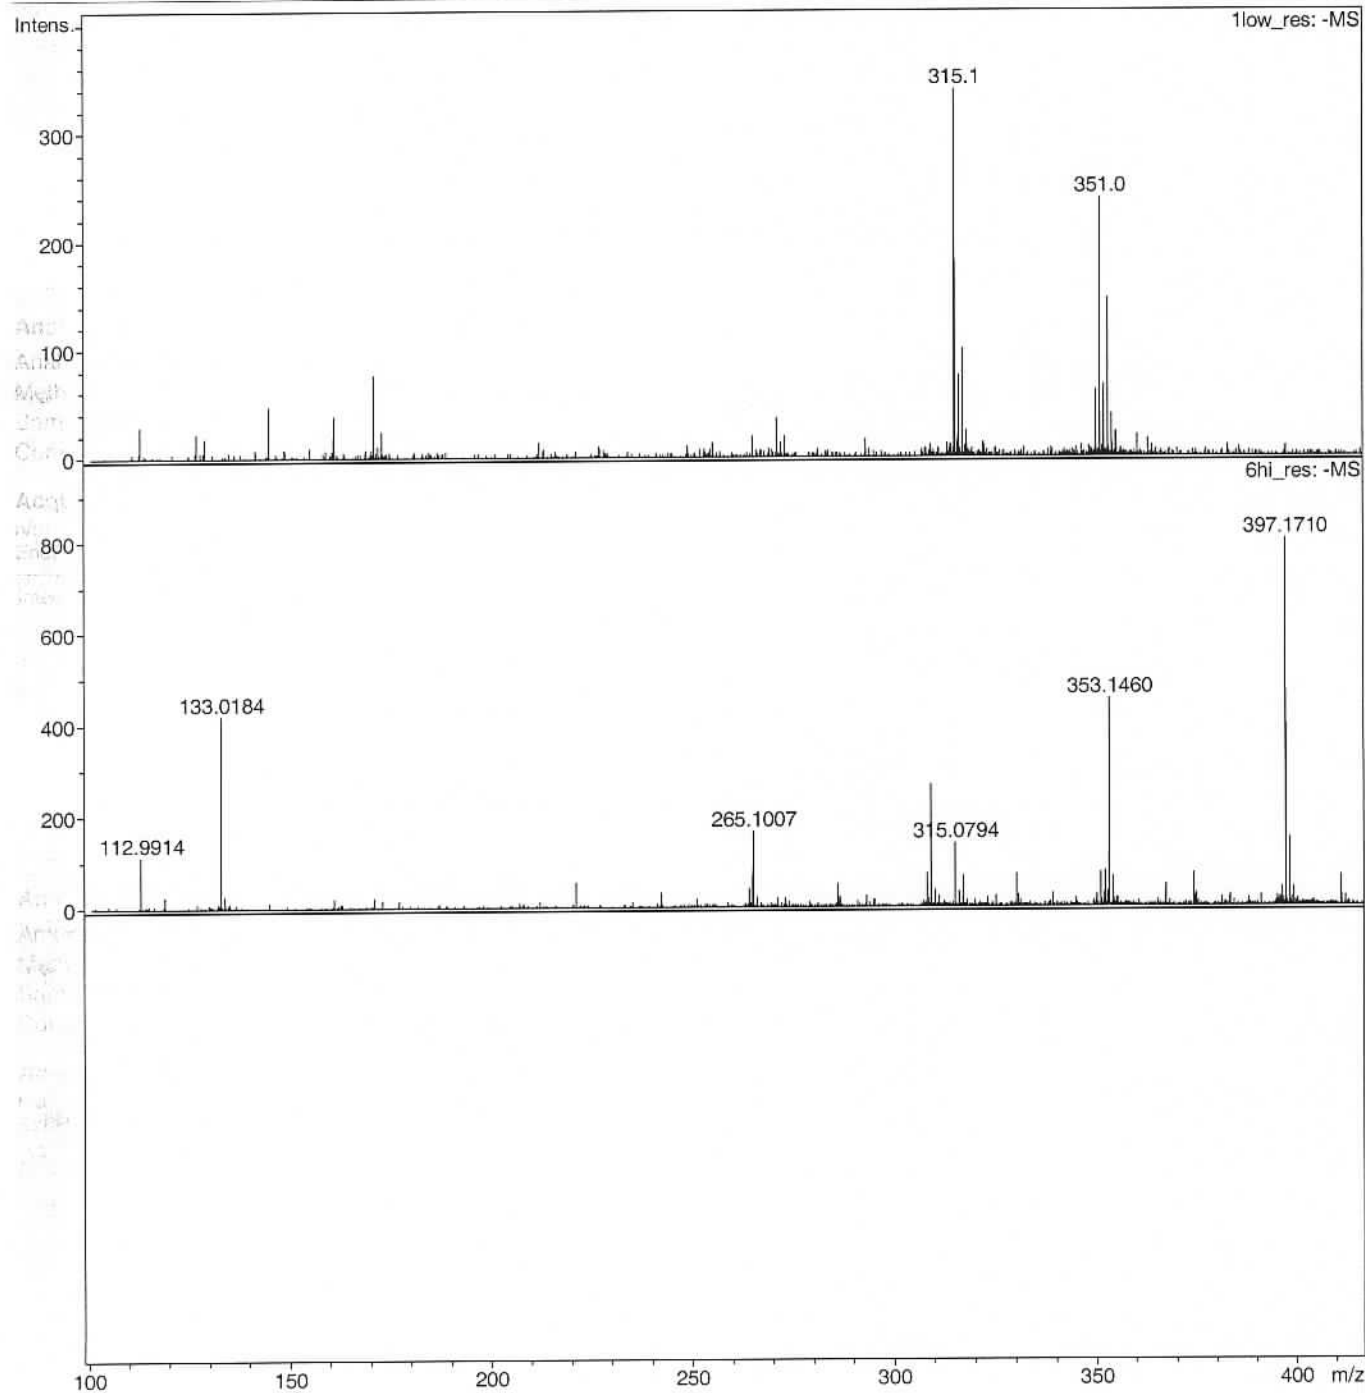

**U of M****University of Minnesota Department of Chemistry****Mass Spectrometry Service Laboratory**

email: chmmslab@umn.edu

**Submit Sample To:** Mass Spectrometry Facility  
207 Pleasant St. SE  
Minneapolis, MN 55455  
Phone: (612)-625-8099  
FAX : (612)-626-7541

| Name: Zhongda Pan                                                                                                                                                                                                                                                               |  | Phone: 612 481 7665                                                                                                                                                                                                                                                                             |    | Date: 03/04/13                |       |     |    |    |       |     |                             |  |  |      |  |                               |  |  |      |   |  |  |  |
|---------------------------------------------------------------------------------------------------------------------------------------------------------------------------------------------------------------------------------------------------------------------------------|--|-------------------------------------------------------------------------------------------------------------------------------------------------------------------------------------------------------------------------------------------------------------------------------------------------|----|-------------------------------|-------|-----|----|----|-------|-----|-----------------------------|--|--|------|--|-------------------------------|--|--|------|---|--|--|--|
| Email: panxx160@umn.edu                                                                                                                                                                                                                                                         |  | Email Results? Yes                                                                                                                                                                                                                                                                              |    | FAX: FAX Results? Y / N       |       |     |    |    |       |     |                             |  |  |      |  |                               |  |  |      |   |  |  |  |
| P.I./Advisor: Chris Douglas                                                                                                                                                                                                                                                     |  | U of M Budget # 5190022                                                                                                                                                                                                                                                                         |    |                               |       |     |    |    |       |     |                             |  |  |      |  |                               |  |  |      |   |  |  |  |
| Company/University:                                                                                                                                                                                                                                                             |  | P.O.# (For non-U of M Clients)                                                                                                                                                                                                                                                                  |    |                               |       |     |    |    |       |     |                             |  |  |      |  |                               |  |  |      |   |  |  |  |
| Shipping Address:                                                                                                                                                                                                                                                               |  | Billing Address:                                                                                                                                                                                                                                                                                |    |                               |       |     |    |    |       |     |                             |  |  |      |  |                               |  |  |      |   |  |  |  |
| Sample Label: 1h                                                                                                                                                                                                                                                                |  | Molecular Weight: 327.3313                                                                                                                                                                                                                                                                      |    |                               |       |     |    |    |       |     |                             |  |  |      |  |                               |  |  |      |   |  |  |  |
| 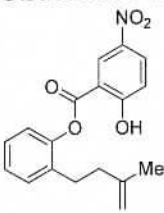<br>1h                                                                                                                                                                                        |  | Molecular Formula: C <sub>18</sub> H <sub>17</sub> NO <sub>5</sub>                                                                                                                                                                                                                              |    |                               |       |     |    |    |       |     |                             |  |  |      |  |                               |  |  |      |   |  |  |  |
|                                                                                                                                                                                                                                                                                 |  | Melting/Boiling Point: N/A                                                                                                                                                                                                                                                                      |    |                               |       |     |    |    |       |     |                             |  |  |      |  |                               |  |  |      |   |  |  |  |
|                                                                                                                                                                                                                                                                                 |  | Solubility: DCM, CH <sub>3</sub> CN, MeOH, EA                                                                                                                                                                                                                                                   |    |                               |       |     |    |    |       |     |                             |  |  |      |  |                               |  |  |      |   |  |  |  |
|                                                                                                                                                                                                                                                                                 |  | Thermal Stability: Yes                                                                                                                                                                                                                                                                          |    |                               |       |     |    |    |       |     |                             |  |  |      |  |                               |  |  |      |   |  |  |  |
|                                                                                                                                                                                                                                                                                 |  | Toxicity: NO                                                                                                                                                                                                                                                                                    |    |                               |       |     |    |    |       |     |                             |  |  |      |  |                               |  |  |      |   |  |  |  |
| Reactivity: acidic proton                                                                                                                                                                                                                                                       |  |                                                                                                                                                                                                                                                                                                 |    |                               |       |     |    |    |       |     |                             |  |  |      |  |                               |  |  |      |   |  |  |  |
| <b>Chromatography Conditions:</b>                                                                                                                                                                                                                                               |  | <b>Analysis Requested</b>                                                                                                                                                                                                                                                                       |    |                               |       |     |    |    |       |     |                             |  |  |      |  |                               |  |  |      |   |  |  |  |
|                                                                                                                                                                                                                                                                                 |  | <table border="1"><thead><tr><th></th><th>EI</th><th>CI</th><th>MALDI</th><th>ESI</th></tr></thead><tbody><tr><td>Low Resolution Nominal Mass</td><td></td><td></td><td></td><td></td></tr><tr><td>High Resolution Accurate Mass</td><td></td><td></td><td></td><td>✓</td></tr></tbody></table> |    |                               |       |     | EI | CI | MALDI | ESI | Low Resolution Nominal Mass |  |  |      |  | High Resolution Accurate Mass |  |  |      | ✓ |  |  |  |
|                                                                                                                                                                                                                                                                                 |  |                                                                                                                                                                                                                                                                                                 | EI | CI                            | MALDI | ESI |    |    |       |     |                             |  |  |      |  |                               |  |  |      |   |  |  |  |
|                                                                                                                                                                                                                                                                                 |  | Low Resolution Nominal Mass                                                                                                                                                                                                                                                                     |    |                               |       |     |    |    |       |     |                             |  |  |      |  |                               |  |  |      |   |  |  |  |
| High Resolution Accurate Mass                                                                                                                                                                                                                                                   |  |                                                                                                                                                                                                                                                                                                 |    | ✓                             |       |     |    |    |       |     |                             |  |  |      |  |                               |  |  |      |   |  |  |  |
| <b>Special Sample Considerations:</b>                                                                                                                                                                                                                                           |  |                                                                                                                                                                                                                                                                                                 |    |                               |       |     |    |    |       |     |                             |  |  |      |  |                               |  |  |      |   |  |  |  |
| <table border="1"><tbody><tr><td>+Ve</td><td></td><td></td><td></td><td></td></tr><tr><td>-Ve</td><td></td><td></td><td></td><td></td></tr><tr><td>GCMS</td><td></td><td></td><td></td><td></td></tr><tr><td>LCMS</td><td></td><td></td><td></td><td></td></tr></tbody></table> |  |                                                                                                                                                                                                                                                                                                 |    | +Ve                           |       |     |    |    | -Ve   |     |                             |  |  | GCMS |  |                               |  |  | LCMS |   |  |  |  |
| +Ve                                                                                                                                                                                                                                                                             |  |                                                                                                                                                                                                                                                                                                 |    |                               |       |     |    |    |       |     |                             |  |  |      |  |                               |  |  |      |   |  |  |  |
| -Ve                                                                                                                                                                                                                                                                             |  |                                                                                                                                                                                                                                                                                                 |    |                               |       |     |    |    |       |     |                             |  |  |      |  |                               |  |  |      |   |  |  |  |
| GCMS                                                                                                                                                                                                                                                                            |  |                                                                                                                                                                                                                                                                                                 |    |                               |       |     |    |    |       |     |                             |  |  |      |  |                               |  |  |      |   |  |  |  |
| LCMS                                                                                                                                                                                                                                                                            |  |                                                                                                                                                                                                                                                                                                 |    |                               |       |     |    |    |       |     |                             |  |  |      |  |                               |  |  |      |   |  |  |  |
| <b>Instrument Used</b>                                                                                                                                                                                                                                                          |  | <b>Conditions Used</b>                                                                                                                                                                                                                                                                          |    | <b>Operator Comments</b>      |       |     |    |    |       |     |                             |  |  |      |  |                               |  |  |      |   |  |  |  |
| Finnigan MAT 95                                                                                                                                                                                                                                                                 |  | Source Temp:                                                                                                                                                                                                                                                                                    |    | [M-H] <sup>-</sup> : 326.1027 |       |     |    |    |       |     |                             |  |  |      |  |                               |  |  |      |   |  |  |  |
| Bruker Reflex III                                                                                                                                                                                                                                                               |  | Acc. Voltage:                                                                                                                                                                                                                                                                                   |    |                               |       |     |    |    |       |     |                             |  |  |      |  |                               |  |  |      |   |  |  |  |
| Bruker BioTOF II                                                                                                                                                                                                                                                                |  | Resolution:                                                                                                                                                                                                                                                                                     |    |                               |       |     |    |    |       |     |                             |  |  |      |  |                               |  |  |      |   |  |  |  |
| Waters Triple Quad                                                                                                                                                                                                                                                              |  | Scan Range:                                                                                                                                                                                                                                                                                     |    |                               |       |     |    |    |       |     |                             |  |  |      |  |                               |  |  |      |   |  |  |  |
| Waters Synapt G2                                                                                                                                                                                                                                                                |  | Gas Used:                                                                                                                                                                                                                                                                                       |    |                               |       |     |    |    |       |     |                             |  |  |      |  |                               |  |  |      |   |  |  |  |
| Log #:                                                                                                                                                                                                                                                                          |  | Analyst:                                                                                                                                                                                                                                                                                        |    | Analysis Date:                |       |     |    |    |       |     |                             |  |  |      |  |                               |  |  |      |   |  |  |  |
|                                                                                                                                                                                                                                                                                 |  |                                                                                                                                                                                                                                                                                                 |    | Analyses Run:                 |       |     |    |    |       |     |                             |  |  |      |  |                               |  |  |      |   |  |  |  |
|                                                                                                                                                                                                                                                                                 |  |                                                                                                                                                                                                                                                                                                 |    | Total Cost:                   |       |     |    |    |       |     |                             |  |  |      |  |                               |  |  |      |   |  |  |  |

100645

1h

chresi

Kyle Kalstabakken

3/12/2013 1:00:35 PM

# Display Report

## Analysis Info

Analysis Name Z:\mslab\100645\5hi\_res  
Method negative\_041013.tofpar  
Sample Name 100645  
Comment

Acquisition Date 4/11/2013 5:28:57 PM

Operator operator name  
Instrument BioTOF II

## Acquisition Parameter

|      |        |     |     |         |        |
|------|--------|-----|-----|---------|--------|
| n/a  | n/a    | n/a | n/a | detbias | 1800 V |
| EndP | 3000 V | n/a | n/a | n/a     | n/a    |

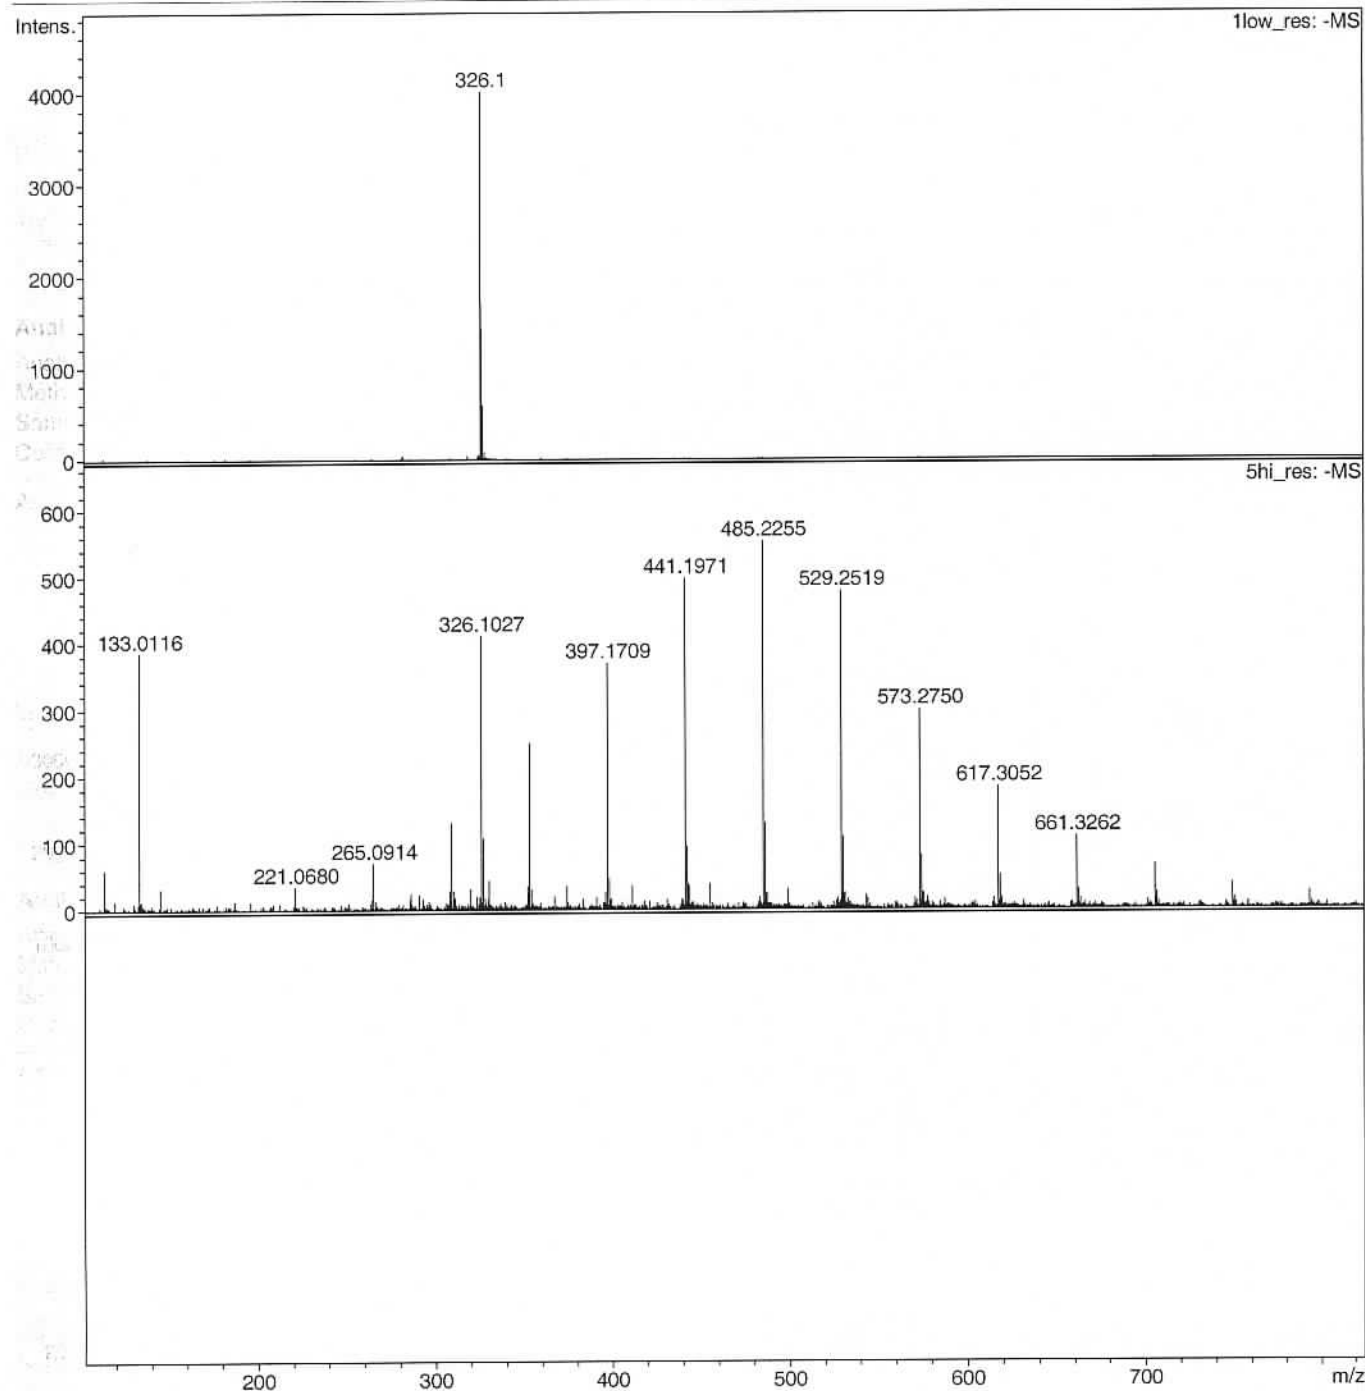

**U of M****University of Minnesota Department of Chemistry****Mass Spectrometry Service Laboratory**

email: chmmslab@umn.edu

**Submit Sample To:** Mass Spectrometry Facility  
207 Pleasant St. SE  
Minneapolis, MN 55455  
Phone: (612)-625-8099  
FAX : (612)-626-7541

| Name: Zhongda Pan                                                                        |          | Phone: 612 481 7665                                                                                                                                                                                                                                                                             |       | Date: 03/04/13                |             |     |    |    |       |     |                             |  |  |  |  |                               |  |  |  |   |      |  |  |  |  |
|------------------------------------------------------------------------------------------|----------|-------------------------------------------------------------------------------------------------------------------------------------------------------------------------------------------------------------------------------------------------------------------------------------------------|-------|-------------------------------|-------------|-----|----|----|-------|-----|-----------------------------|--|--|--|--|-------------------------------|--|--|--|---|------|--|--|--|--|
| Email: panxx160@umn.edu                                                                  |          | Email Results? Yes                                                                                                                                                                                                                                                                              |       | FAX: FAX Results? Y / N       |             |     |    |    |       |     |                             |  |  |  |  |                               |  |  |  |   |      |  |  |  |  |
| P.I./Advisor: Chris Douglas                                                              |          | U of M Budget # 5190022                                                                                                                                                                                                                                                                         |       |                               |             |     |    |    |       |     |                             |  |  |  |  |                               |  |  |  |   |      |  |  |  |  |
| Company/University:                                                                      |          | P.O.# (For non-U of M Clients)                                                                                                                                                                                                                                                                  |       |                               |             |     |    |    |       |     |                             |  |  |  |  |                               |  |  |  |   |      |  |  |  |  |
| Shipping Address:                                                                        |          | Billing Address:                                                                                                                                                                                                                                                                                |       |                               |             |     |    |    |       |     |                             |  |  |  |  |                               |  |  |  |   |      |  |  |  |  |
| Sample Label: 1i                                                                         |          | Molecular Weight: 316.7788                                                                                                                                                                                                                                                                      |       |                               |             |     |    |    |       |     |                             |  |  |  |  |                               |  |  |  |   |      |  |  |  |  |
| 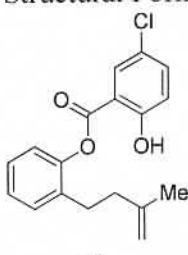<br>1i |          | Molecular Formula: C <sub>18</sub> H <sub>17</sub> ClO <sub>3</sub>                                                                                                                                                                                                                             |       |                               |             |     |    |    |       |     |                             |  |  |  |  |                               |  |  |  |   |      |  |  |  |  |
|                                                                                          |          | Melting/Boiling Point: N/A                                                                                                                                                                                                                                                                      |       |                               |             |     |    |    |       |     |                             |  |  |  |  |                               |  |  |  |   |      |  |  |  |  |
|                                                                                          |          | Solubility: DCM, CH <sub>3</sub> CN, MeOH, EA                                                                                                                                                                                                                                                   |       |                               |             |     |    |    |       |     |                             |  |  |  |  |                               |  |  |  |   |      |  |  |  |  |
|                                                                                          |          | Thermal Stability: Yes                                                                                                                                                                                                                                                                          |       |                               |             |     |    |    |       |     |                             |  |  |  |  |                               |  |  |  |   |      |  |  |  |  |
|                                                                                          |          | Toxicity: NO                                                                                                                                                                                                                                                                                    |       |                               |             |     |    |    |       |     |                             |  |  |  |  |                               |  |  |  |   |      |  |  |  |  |
| Reactivity: acidic proton                                                                |          |                                                                                                                                                                                                                                                                                                 |       |                               |             |     |    |    |       |     |                             |  |  |  |  |                               |  |  |  |   |      |  |  |  |  |
| <b>Chromatography Conditions:</b>                                                        |          | <b>Analysis Requested</b>                                                                                                                                                                                                                                                                       |       |                               |             |     |    |    |       |     |                             |  |  |  |  |                               |  |  |  |   |      |  |  |  |  |
|                                                                                          |          | <table border="1"><thead><tr><th></th><th>EI</th><th>CI</th><th>MALDI</th><th>ESI</th></tr></thead><tbody><tr><td>Low Resolution Nominal Mass</td><td></td><td></td><td></td><td></td></tr><tr><td>High Resolution Accurate Mass</td><td></td><td></td><td></td><td>✓</td></tr></tbody></table> |       |                               |             |     | EI | CI | MALDI | ESI | Low Resolution Nominal Mass |  |  |  |  | High Resolution Accurate Mass |  |  |  | ✓ |      |  |  |  |  |
|                                                                                          | EI       | CI                                                                                                                                                                                                                                                                                              | MALDI | ESI                           |             |     |    |    |       |     |                             |  |  |  |  |                               |  |  |  |   |      |  |  |  |  |
| Low Resolution Nominal Mass                                                              |          |                                                                                                                                                                                                                                                                                                 |       |                               |             |     |    |    |       |     |                             |  |  |  |  |                               |  |  |  |   |      |  |  |  |  |
| High Resolution Accurate Mass                                                            |          |                                                                                                                                                                                                                                                                                                 |       | ✓                             |             |     |    |    |       |     |                             |  |  |  |  |                               |  |  |  |   |      |  |  |  |  |
| <b>Special Sample Considerations:</b>                                                    |          | <table border="1"><tbody><tr><td>+Ve</td><td></td><td></td><td></td><td></td></tr><tr><td>-Ve</td><td></td><td></td><td></td><td></td></tr><tr><td>GCMS</td><td></td><td></td><td></td><td></td></tr><tr><td>LCMS</td><td></td><td></td><td></td><td></td></tr></tbody></table>                 |       |                               |             | +Ve |    |    |       |     | -Ve                         |  |  |  |  | GCMS                          |  |  |  |   | LCMS |  |  |  |  |
| +Ve                                                                                      |          |                                                                                                                                                                                                                                                                                                 |       |                               |             |     |    |    |       |     |                             |  |  |  |  |                               |  |  |  |   |      |  |  |  |  |
| -Ve                                                                                      |          |                                                                                                                                                                                                                                                                                                 |       |                               |             |     |    |    |       |     |                             |  |  |  |  |                               |  |  |  |   |      |  |  |  |  |
| GCMS                                                                                     |          |                                                                                                                                                                                                                                                                                                 |       |                               |             |     |    |    |       |     |                             |  |  |  |  |                               |  |  |  |   |      |  |  |  |  |
| LCMS                                                                                     |          |                                                                                                                                                                                                                                                                                                 |       |                               |             |     |    |    |       |     |                             |  |  |  |  |                               |  |  |  |   |      |  |  |  |  |
| <b>Instrument Used</b>                                                                   |          | <b>Conditions Used</b>                                                                                                                                                                                                                                                                          |       | <b>Operator Comments</b>      |             |     |    |    |       |     |                             |  |  |  |  |                               |  |  |  |   |      |  |  |  |  |
| Finnigan MAT 95                                                                          |          | Source Temp:                                                                                                                                                                                                                                                                                    |       | [M-H] <sup>-</sup> : 315.0784 |             |     |    |    |       |     |                             |  |  |  |  |                               |  |  |  |   |      |  |  |  |  |
| Bruker Reflex III                                                                        |          | Acc. Voltage:                                                                                                                                                                                                                                                                                   |       |                               |             |     |    |    |       |     |                             |  |  |  |  |                               |  |  |  |   |      |  |  |  |  |
| Bruker BioTOF II                                                                         |          | Resolution:                                                                                                                                                                                                                                                                                     |       |                               |             |     |    |    |       |     |                             |  |  |  |  |                               |  |  |  |   |      |  |  |  |  |
| Waters Triple Quad                                                                       |          | Scan Range:                                                                                                                                                                                                                                                                                     |       |                               |             |     |    |    |       |     |                             |  |  |  |  |                               |  |  |  |   |      |  |  |  |  |
| Waters Synapt G2                                                                         |          | Gas Used:                                                                                                                                                                                                                                                                                       |       |                               |             |     |    |    |       |     |                             |  |  |  |  |                               |  |  |  |   |      |  |  |  |  |
| Log #:                                                                                   | Analyst: | Analysis Date:                                                                                                                                                                                                                                                                                  |       | Analyses Run:                 | Total Cost: |     |    |    |       |     |                             |  |  |  |  |                               |  |  |  |   |      |  |  |  |  |

100646

1i

chresi

Kyle Kalstabakken

3/12/2013 1:01:35 PM

# Display Report

## Analysis Info

Analysis Name Z:\mslab\100646\5hi\_res  
Method negative\_041013.tofpar  
Sample Name 100646  
Comment

Acquisition Date 4/11/2013 5:37:13 PM

Operator operator name  
Instrument BioTOF II

## Acquisition Parameter

|      |        |     |     |         |        |
|------|--------|-----|-----|---------|--------|
| n/a  | n/a    | n/a | n/a | detbias | 1800 V |
| EndP | 3000 V | n/a | n/a | n/a     | n/a    |

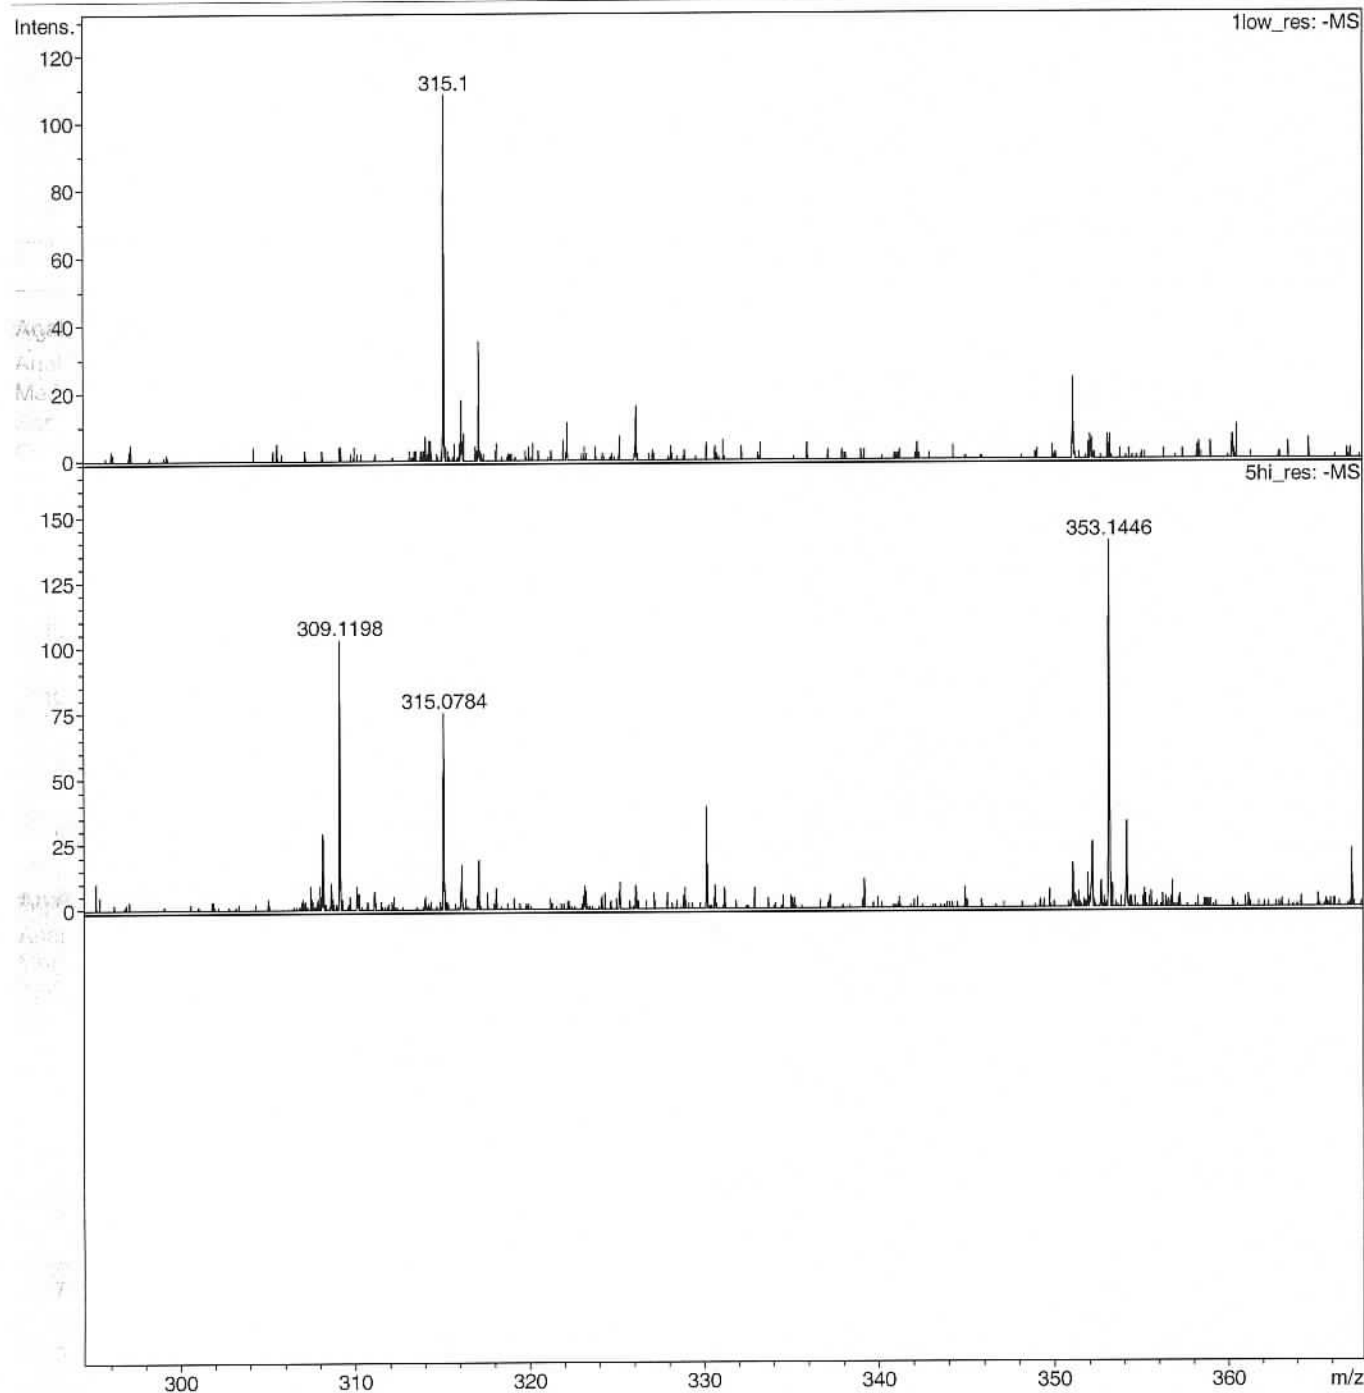



**University of Minnesota Department of Chemistry**  
**Mass Spectrometry Service Laboratory**  
 email: [chmmmslab@umn.edu](mailto:chmmmslab@umn.edu)

**Submit Sample To:** Mass Spectrometry Facility  
207 Pleasant St. SE  
Minneapolis, MN 55455  
Phone: (612)-625-8099  
FAX : (612)-626-7541

|                                                                                                                                 |  |                                                                                  |    |                                                        |       |     |
|---------------------------------------------------------------------------------------------------------------------------------|--|----------------------------------------------------------------------------------|----|--------------------------------------------------------|-------|-----|
| Name: Zhongda Pan                                                                                                               |  | Phone: 612 481 7665                                                              |    | Date: 03/04/13                                         |       |     |
| Email: panxx160@umn.edu                                                                                                         |  | Email Results? Yes                                                               |    | FAX: FAX Results? Y / N                                |       |     |
| P.I./Advisor: Chris Douglas                                                                                                     |  | U of M Budget # 5190022                                                          |    |                                                        |       |     |
| Company/University:                                                                                                             |  | P.O.# (For non-U of M Clients)                                                   |    |                                                        |       |     |
| Shipping Address:                                                                                                               |  | Billing Address:                                                                 |    |                                                        |       |     |
| Sample Label: 1n                                                                                                                |  | Molecular Weight: 352.3045                                                       |    |                                                        |       |     |
| Structural Formula or Sample Composition:<br>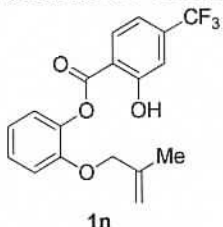 |  | Molecular Formula: C <sub>18</sub> H <sub>15</sub> F <sub>3</sub> O <sub>4</sub> |    |                                                        |       |     |
|                                                                                                                                 |  | Melting/Boiling Point: N/A                                                       |    |                                                        |       |     |
|                                                                                                                                 |  | Solubility: DCM, CH <sub>3</sub> CN, MeOH, EA                                    |    |                                                        |       |     |
|                                                                                                                                 |  | Thermal Stability: Yes                                                           |    |                                                        |       |     |
|                                                                                                                                 |  | Toxicity: NO                                                                     |    |                                                        |       |     |
|                                                                                                                                 |  | Reactivity: acidic proton                                                        |    |                                                        |       |     |
| Chromatography Conditions:                                                                                                      |  | Analysis Requested                                                               |    |                                                        |       |     |
|                                                                                                                                 |  |                                                                                  | EI | CI                                                     | MALDI | ESI |
|                                                                                                                                 |  | Low Resolution Nominal Mass                                                      |    |                                                        |       |     |
|                                                                                                                                 |  | High Resolution Accurate Mass                                                    |    |                                                        |       | ✓   |
| Special Sample Considerations:                                                                                                  |  | +Ve                                                                              |    |                                                        |       |     |
|                                                                                                                                 |  | -Ve                                                                              |    |                                                        |       |     |
|                                                                                                                                 |  | GCMS                                                                             |    |                                                        |       |     |
|                                                                                                                                 |  | LCMS                                                                             |    |                                                        |       |     |
| Instrument Used                                                                                                                 |  | Conditions Used                                                                  |    | Operator Comments<br><br>[M-4] <sup>-</sup> : 351.0849 |       |     |
| Finnigan MAT 95                                                                                                                 |  | Source Temp:                                                                     |    |                                                        |       |     |
| Bruker Reflex III                                                                                                               |  | Acc. Voltage:                                                                    |    |                                                        |       |     |
| Bruker BioTOF II                                                                                                                |  | Resolution:                                                                      |    |                                                        |       |     |
| Waters Triple Quad                                                                                                              |  | Scan Range:                                                                      |    |                                                        |       |     |
| Waters Synapt G2                                                                                                                |  | Gas Used:                                                                        |    |                                                        |       |     |
| Log #:                                                                                                                          |  | Analyst:                                                                         |    | Analysis Date:                                         |       |     |
|                                                                                                                                 |  |                                                                                  |    | Analyses Run:                                          |       |     |
|                                                                                                                                 |  |                                                                                  |    | Total Cost:                                            |       |     |

100647  
1n  
chresi  
Kyle Kalstabakken  
3/12/2013 1:02:39 PM

# Display Report

## Analysis Info

Analysis Name Z:\mslab\100647\2hi\_res  
Method negative\_041013.tofpar  
Sample Name 100647  
Comment

Acquisition Date 4/11/2013 5:42:54 PM

Operator operator name  
Instrument BioTOF II

## Acquisition Parameter

|      |        |     |     |         |        |
|------|--------|-----|-----|---------|--------|
| n/a  | n/a    | n/a | n/a | detbias | 1800 V |
| EndP | 3000 V | n/a | n/a | n/a     | n/a    |

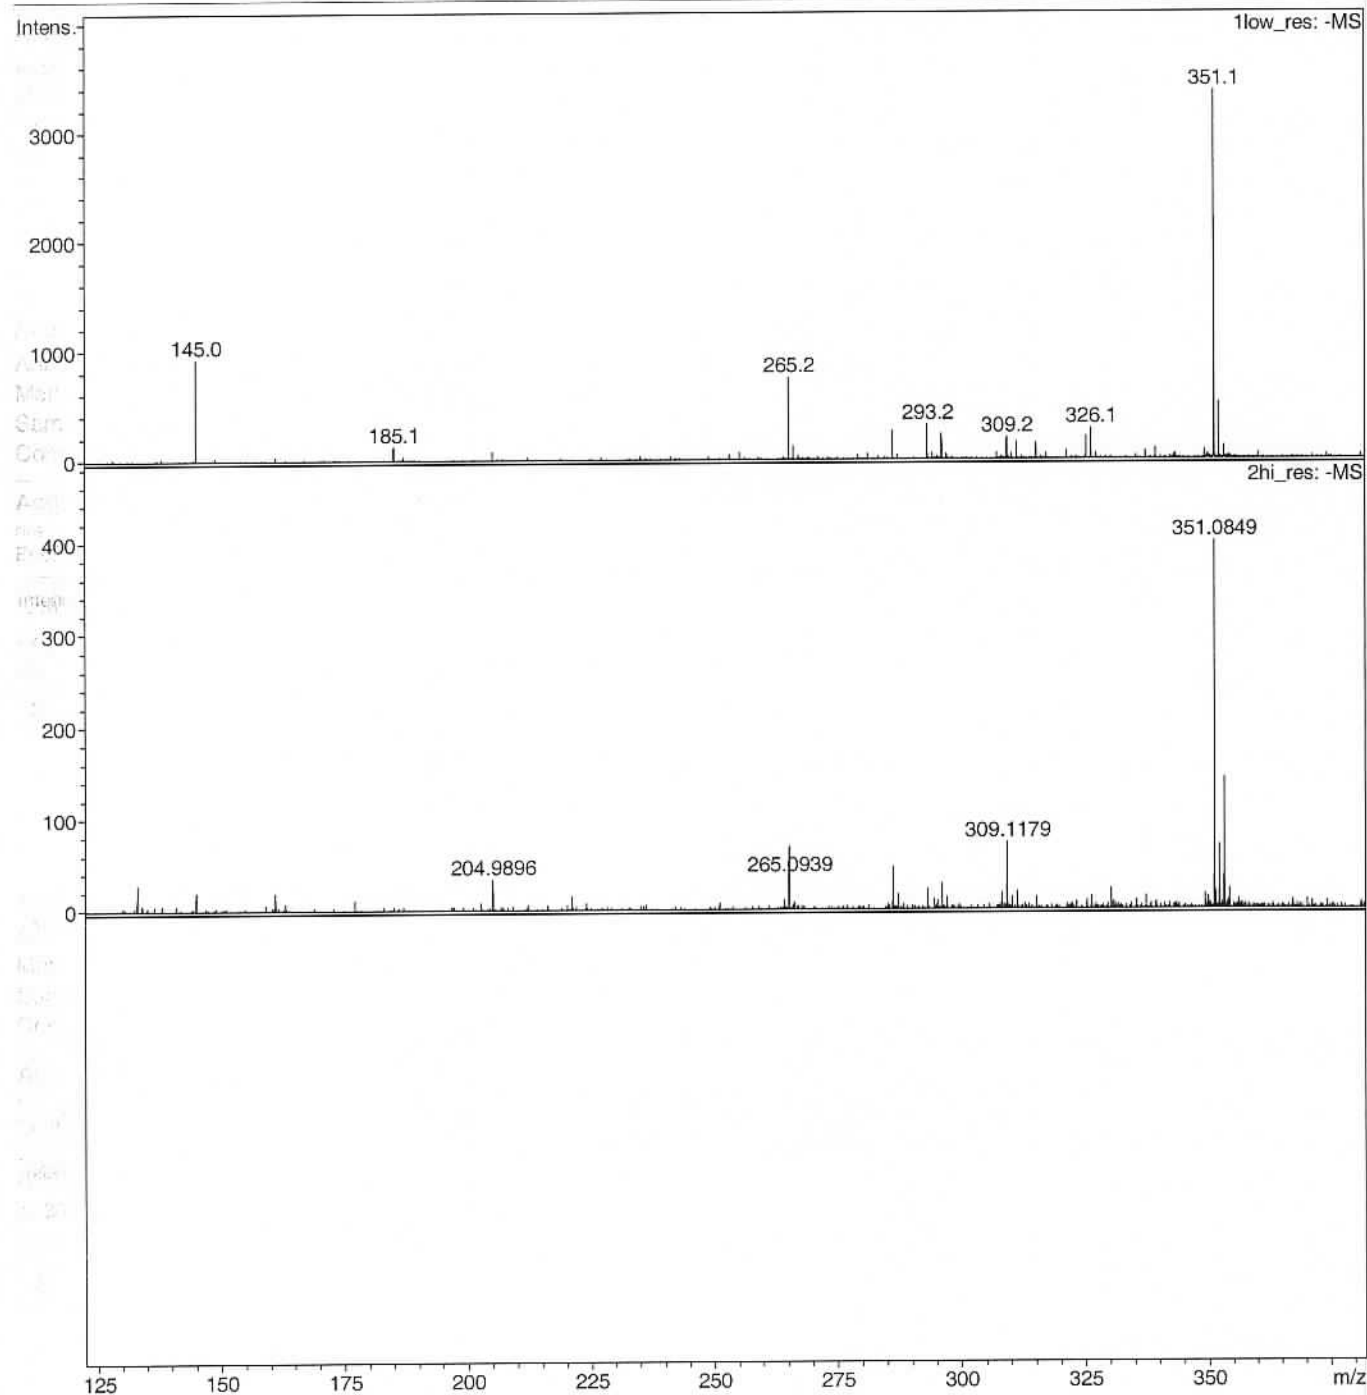

**U of M****University of Minnesota Department of Chemistry****Mass Spectrometry Service Laboratory**

email: chmmslab@umn.edu

**Submit Sample To:** Mass Spectrometry Facility  
207 Pleasant St. SE  
Minneapolis, MN 55455  
Phone: (612)-625-8099  
FAX: (612)-626-7541

| Name: Zhongda Pan                                                                                                                                                                                                                                                               |          | Phone: 612 481 7665                                                                                                                                                                                                                                                                             |    | Date: 03/04/13                |             |     |    |    |       |     |                             |  |  |      |  |                               |  |  |      |   |  |  |  |
|---------------------------------------------------------------------------------------------------------------------------------------------------------------------------------------------------------------------------------------------------------------------------------|----------|-------------------------------------------------------------------------------------------------------------------------------------------------------------------------------------------------------------------------------------------------------------------------------------------------|----|-------------------------------|-------------|-----|----|----|-------|-----|-----------------------------|--|--|------|--|-------------------------------|--|--|------|---|--|--|--|
| Email: panxx160@umn.edu                                                                                                                                                                                                                                                         |          | Email Results? Yes                                                                                                                                                                                                                                                                              |    | FAX: FAX Results? Y / N       |             |     |    |    |       |     |                             |  |  |      |  |                               |  |  |      |   |  |  |  |
| P.I./Advisor: Chris Douglas                                                                                                                                                                                                                                                     |          | U of M Budget # 5190022                                                                                                                                                                                                                                                                         |    |                               |             |     |    |    |       |     |                             |  |  |      |  |                               |  |  |      |   |  |  |  |
| Company/University:                                                                                                                                                                                                                                                             |          | P.O.# (For non-U of M Clients)                                                                                                                                                                                                                                                                  |    |                               |             |     |    |    |       |     |                             |  |  |      |  |                               |  |  |      |   |  |  |  |
| Shipping Address:                                                                                                                                                                                                                                                               |          | Billing Address:                                                                                                                                                                                                                                                                                |    |                               |             |     |    |    |       |     |                             |  |  |      |  |                               |  |  |      |   |  |  |  |
| Sample Label: 2h                                                                                                                                                                                                                                                                |          | Molecular Weight: 327.3313                                                                                                                                                                                                                                                                      |    |                               |             |     |    |    |       |     |                             |  |  |      |  |                               |  |  |      |   |  |  |  |
| <div>Structural Formula or Sample Composition:</div> 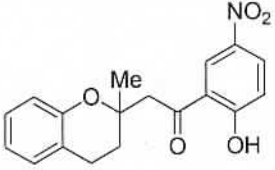 <p>2h</p>                                                                                                                                |          | Molecular Formula: C <sub>18</sub> H <sub>17</sub> NO <sub>5</sub>                                                                                                                                                                                                                              |    |                               |             |     |    |    |       |     |                             |  |  |      |  |                               |  |  |      |   |  |  |  |
|                                                                                                                                                                                                                                                                                 |          | Melting/Boiling Point: N/A                                                                                                                                                                                                                                                                      |    |                               |             |     |    |    |       |     |                             |  |  |      |  |                               |  |  |      |   |  |  |  |
|                                                                                                                                                                                                                                                                                 |          | Solubility: DCM, CH <sub>3</sub> CN, MeOH, EA                                                                                                                                                                                                                                                   |    |                               |             |     |    |    |       |     |                             |  |  |      |  |                               |  |  |      |   |  |  |  |
|                                                                                                                                                                                                                                                                                 |          | Thermal Stability: Yes                                                                                                                                                                                                                                                                          |    |                               |             |     |    |    |       |     |                             |  |  |      |  |                               |  |  |      |   |  |  |  |
|                                                                                                                                                                                                                                                                                 |          | Toxicity: NO                                                                                                                                                                                                                                                                                    |    |                               |             |     |    |    |       |     |                             |  |  |      |  |                               |  |  |      |   |  |  |  |
| <div>Chromatography Conditions:</div>                                                                                                                                                                                                                                           |          | <div>Analysis Requested</div>                                                                                                                                                                                                                                                                   |    |                               |             |     |    |    |       |     |                             |  |  |      |  |                               |  |  |      |   |  |  |  |
|                                                                                                                                                                                                                                                                                 |          | <table border="1"><thead><tr><th></th><th>EI</th><th>CI</th><th>MALDI</th><th>ESI</th></tr></thead><tbody><tr><td>Low Resolution Nominal Mass</td><td></td><td></td><td></td><td></td></tr><tr><td>High Resolution Accurate Mass</td><td></td><td></td><td></td><td>✓</td></tr></tbody></table> |    |                               |             |     | EI | CI | MALDI | ESI | Low Resolution Nominal Mass |  |  |      |  | High Resolution Accurate Mass |  |  |      | ✓ |  |  |  |
|                                                                                                                                                                                                                                                                                 |          |                                                                                                                                                                                                                                                                                                 | EI | CI                            | MALDI       | ESI |    |    |       |     |                             |  |  |      |  |                               |  |  |      |   |  |  |  |
|                                                                                                                                                                                                                                                                                 |          | Low Resolution Nominal Mass                                                                                                                                                                                                                                                                     |    |                               |             |     |    |    |       |     |                             |  |  |      |  |                               |  |  |      |   |  |  |  |
|                                                                                                                                                                                                                                                                                 |          | High Resolution Accurate Mass                                                                                                                                                                                                                                                                   |    |                               |             | ✓   |    |    |       |     |                             |  |  |      |  |                               |  |  |      |   |  |  |  |
| <div>Special Sample Considerations:</div>                                                                                                                                                                                                                                       |          |                                                                                                                                                                                                                                                                                                 |    |                               |             |     |    |    |       |     |                             |  |  |      |  |                               |  |  |      |   |  |  |  |
| <table border="1"><tbody><tr><td>+Ve</td><td></td><td></td><td></td><td></td></tr><tr><td>-Ve</td><td></td><td></td><td></td><td></td></tr><tr><td>GCMS</td><td></td><td></td><td></td><td></td></tr><tr><td>LCMS</td><td></td><td></td><td></td><td></td></tr></tbody></table> |          |                                                                                                                                                                                                                                                                                                 |    | +Ve                           |             |     |    |    | -Ve   |     |                             |  |  | GCMS |  |                               |  |  | LCMS |   |  |  |  |
| +Ve                                                                                                                                                                                                                                                                             |          |                                                                                                                                                                                                                                                                                                 |    |                               |             |     |    |    |       |     |                             |  |  |      |  |                               |  |  |      |   |  |  |  |
| -Ve                                                                                                                                                                                                                                                                             |          |                                                                                                                                                                                                                                                                                                 |    |                               |             |     |    |    |       |     |                             |  |  |      |  |                               |  |  |      |   |  |  |  |
| GCMS                                                                                                                                                                                                                                                                            |          |                                                                                                                                                                                                                                                                                                 |    |                               |             |     |    |    |       |     |                             |  |  |      |  |                               |  |  |      |   |  |  |  |
| LCMS                                                                                                                                                                                                                                                                            |          |                                                                                                                                                                                                                                                                                                 |    |                               |             |     |    |    |       |     |                             |  |  |      |  |                               |  |  |      |   |  |  |  |
| <div>Instrument Used</div>                                                                                                                                                                                                                                                      |          | <div>Conditions Used</div>                                                                                                                                                                                                                                                                      |    | <div>Operator Comments</div>  |             |     |    |    |       |     |                             |  |  |      |  |                               |  |  |      |   |  |  |  |
| Finnigan MAT 95                                                                                                                                                                                                                                                                 |          | Source Temp:                                                                                                                                                                                                                                                                                    |    | [M-H] <sup>-</sup> : 326.1034 |             |     |    |    |       |     |                             |  |  |      |  |                               |  |  |      |   |  |  |  |
| Bruker Reflex III                                                                                                                                                                                                                                                               |          | Acc. Voltage:                                                                                                                                                                                                                                                                                   |    |                               |             |     |    |    |       |     |                             |  |  |      |  |                               |  |  |      |   |  |  |  |
| Bruker BioTOF II                                                                                                                                                                                                                                                                |          | Resolution:                                                                                                                                                                                                                                                                                     |    |                               |             |     |    |    |       |     |                             |  |  |      |  |                               |  |  |      |   |  |  |  |
| Waters Triple Quad                                                                                                                                                                                                                                                              |          | Scan Range:                                                                                                                                                                                                                                                                                     |    |                               |             |     |    |    |       |     |                             |  |  |      |  |                               |  |  |      |   |  |  |  |
| Waters Synapt G2                                                                                                                                                                                                                                                                |          | Gas Used:                                                                                                                                                                                                                                                                                       |    |                               |             |     |    |    |       |     |                             |  |  |      |  |                               |  |  |      |   |  |  |  |
| Log #:                                                                                                                                                                                                                                                                          | Analyst: | Analysis Date:                                                                                                                                                                                                                                                                                  |    | Analyses Run:                 | Total Cost: |     |    |    |       |     |                             |  |  |      |  |                               |  |  |      |   |  |  |  |

100648

2h

chresi

Kyle Kalstabakken

3/12/2013 1:03:28 PM

# Display Report

## Analysis Info

Analysis Name Z:\mslab\100648\3hi\_res  
Method negative\_041013.tofpar  
Sample Name 100648  
Comment

Acquisition Date 4/11/2013 5:53:24 PM

Operator operator name  
Instrument BioTOF II

## Acquisition Parameter

|      |        |     |     |         |        |
|------|--------|-----|-----|---------|--------|
| n/a  | n/a    | n/a | n/a | detbias | 1800 V |
| EndP | 3000 V | n/a | n/a | n/a     | n/a    |

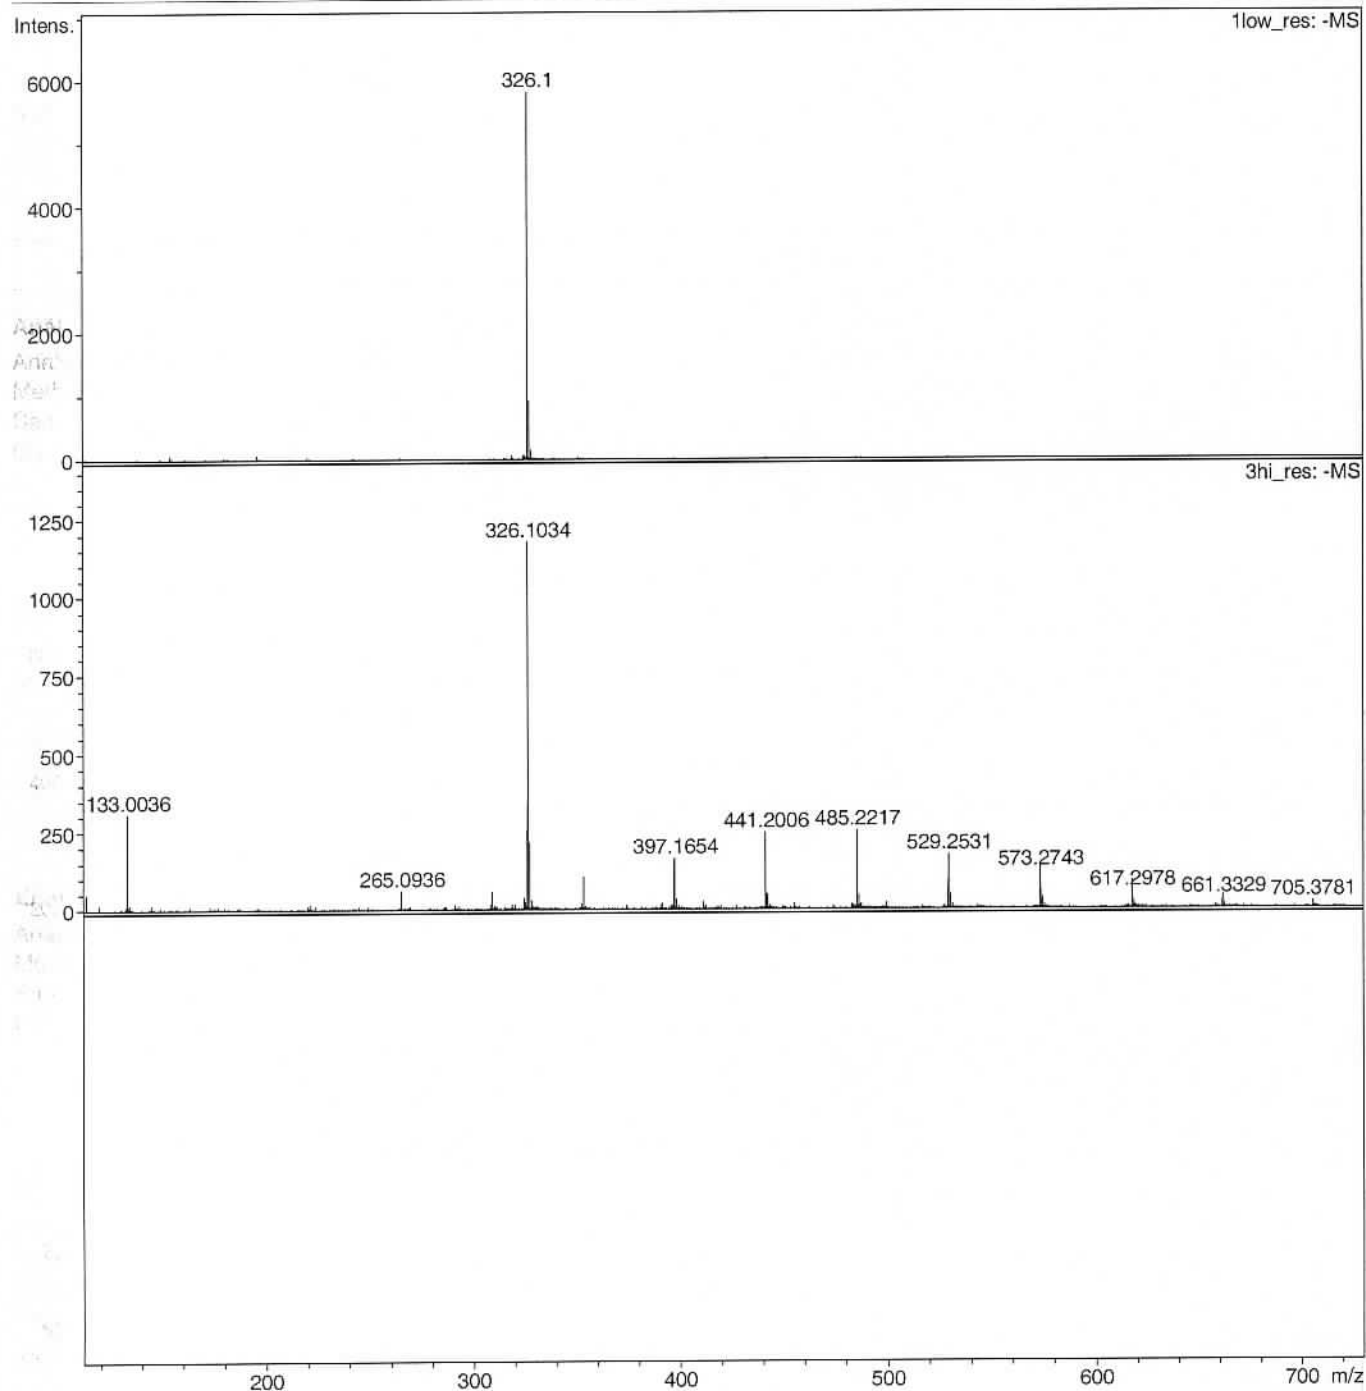

**U of M****University of Minnesota Department of Chemistry****Mass Spectrometry Service Laboratory**

email: chmmslab@umn.edu

**Submit Sample To:** Mass Spectrometry Facility  
207 Pleasant St. SE  
Minneapolis, MN 55455  
Phone: (612)-625-8099  
FAX: (612)-626-7541

|                                                                                         |  |                                                                                  |  |                               |       |               |  |             |  |
|-----------------------------------------------------------------------------------------|--|----------------------------------------------------------------------------------|--|-------------------------------|-------|---------------|--|-------------|--|
| Name: Zhongda Pan                                                                       |  | Phone: 612 481 7665                                                              |  | Date: 03/04/13                |       |               |  |             |  |
| Email: panxx160@umn.edu                                                                 |  | Email Results? Yes                                                               |  | FAX: FAX Results? Y / N       |       |               |  |             |  |
| P.I./Advisor: Chris Douglas                                                             |  | U of M Budget # 5190022                                                          |  |                               |       |               |  |             |  |
| Company/University:                                                                     |  | P.O.# (For non-U of M Clients)                                                   |  |                               |       |               |  |             |  |
| Shipping Address:                                                                       |  | Billing Address:                                                                 |  |                               |       |               |  |             |  |
| Sample Label: 2n                                                                        |  | Molecular Weight: 352.3045                                                       |  |                               |       |               |  |             |  |
| 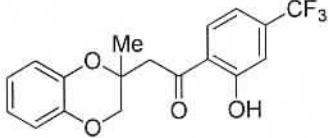<br>2n |  | Molecular Formula: C <sub>18</sub> H <sub>15</sub> F <sub>3</sub> O <sub>4</sub> |  |                               |       |               |  |             |  |
|                                                                                         |  | Melting/Boiling Point: N/A                                                       |  |                               |       |               |  |             |  |
|                                                                                         |  | Solubility: DCM, CH <sub>3</sub> CN, MeOH, EA                                    |  |                               |       |               |  |             |  |
|                                                                                         |  | Thermal Stability: Yes                                                           |  |                               |       |               |  |             |  |
|                                                                                         |  | Toxicity: NO                                                                     |  |                               |       |               |  |             |  |
|                                                                                         |  | Reactivity: acidic proton                                                        |  |                               |       |               |  |             |  |
| <b>Chromatography Conditions:</b>                                                       |  | <b>Analysis Requested</b>                                                        |  |                               |       |               |  |             |  |
|                                                                                         |  | EI                                                                               |  | CI                            | MALDI | ESI           |  |             |  |
|                                                                                         |  | Low Resolution Nominal Mass                                                      |  |                               |       |               |  |             |  |
|                                                                                         |  | High Resolution Accurate Mass                                                    |  |                               |       | ✓             |  |             |  |
|                                                                                         |  |                                                                                  |  |                               |       |               |  |             |  |
| <b>Special Sample Considerations:</b>                                                   |  | +Ve                                                                              |  |                               |       |               |  |             |  |
|                                                                                         |  | -Ve                                                                              |  |                               |       |               |  |             |  |
|                                                                                         |  | GCMS                                                                             |  |                               |       |               |  |             |  |
|                                                                                         |  | LCMS                                                                             |  |                               |       |               |  |             |  |
| <b>Instrument Used</b>                                                                  |  | <b>Conditions Used</b>                                                           |  | <b>Operator Comments</b>      |       |               |  |             |  |
| Finnigan MAT 95                                                                         |  | Source Temp:                                                                     |  | [M-H] <sup>-</sup> : 351.0837 |       |               |  |             |  |
| Bruker Reflex III                                                                       |  | Acc. Voltage:                                                                    |  |                               |       |               |  |             |  |
| Bruker BioTOF II                                                                        |  | Resolution:                                                                      |  |                               |       |               |  |             |  |
| Waters Triple Quad                                                                      |  | Scan Range:                                                                      |  |                               |       |               |  |             |  |
| Waters Synapt G2                                                                        |  | Gas Used:                                                                        |  |                               |       |               |  |             |  |
| Log #:                                                                                  |  | Analyst:                                                                         |  | Analysis Date:                |       | Analyses Run: |  | Total Cost: |  |

100649

2n

chresi

Kyle Kalstabakken

3/12/2013 1:04:23 PM

# Display Report

## Analysis Info

Analysis Name Z:\mslab\100649\4hi\_res  
Method negative\_041013.tofpar  
Sample Name 100649  
Comment

Acquisition Date 4/11/2013 6:04:25 PM

Operator operator name  
Instrument BioTOF II

## Acquisition Parameter

|      |        |     |     |         |        |
|------|--------|-----|-----|---------|--------|
| n/a  | n/a    | n/a | n/a | detbias | 1800 V |
| EndP | 3000 V | n/a | n/a | n/a     | n/a    |

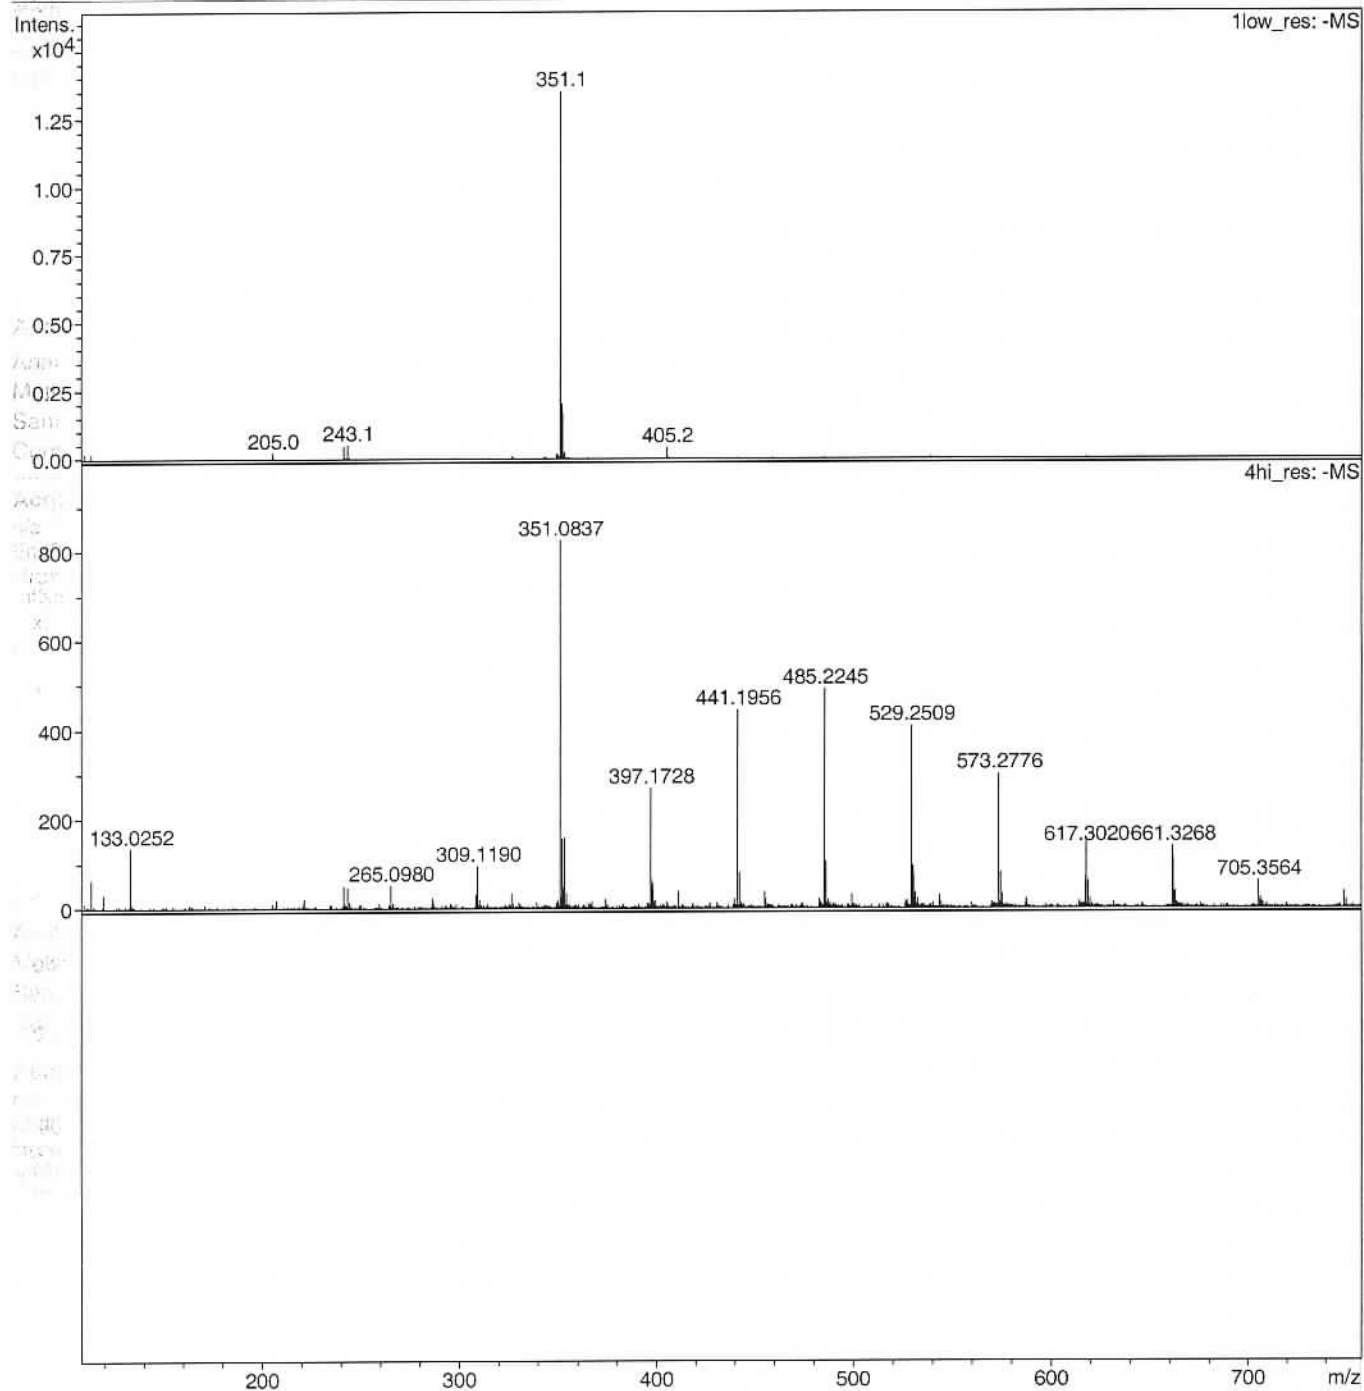

Supplement: Supplementary file 39 [file 3863956]
