# Supplementary material
Source: publisher figshare collection journal article supplement (https://acs.figshare.com/ndownloader/files/3863956)

**U of M****University of Minnesota Department of Chemistry****Mass Spectrometry Service Laboratory**

email: mslab@chem.umn.edu

**Submit Sample To:** Mass Spectrometry Facility  
207 Pleasant St. SE  
Minneapolis, MN 55455  
Phone: (612)-625-8099  
FAX: (612)-626-7541

|                                                                                   |                   |                                                       |                |                                                               |             |
|-----------------------------------------------------------------------------------|-------------------|-------------------------------------------------------|----------------|---------------------------------------------------------------|-------------|
| Name: Giang Hoang                                                                 |                   | Phone: 612-625-3628                                   |                |                                                               |             |
| Email: hoang070@umn.edu                                                           | Send Results? Yes | FAX:                                                  | FAX Results? N |                                                               |             |
| P.I./Advisor: Chris Douglas                                                       |                   | U of M Budget # 519-1015 (519-1015)                   |                |                                                               |             |
| Company/University: Department of Chemistry<br>University of Minnesota            |                   | P.O.# (For non-U of M Clients)                        |                |                                                               |             |
| Shipping Address:                                                                 |                   | Billing Address:                                      |                |                                                               |             |
| Sample Label: HTG3-172P                                                           |                   | Molecular Weight: 176.1201                            |                |                                                               |             |
| 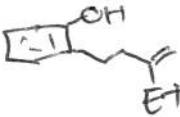 |                   | Molecular Formula: C <sub>12</sub> H <sub>16</sub> O  |                |                                                               |             |
|                                                                                   |                   | Melting/Boiling Point: NA                             |                |                                                               |             |
|                                                                                   |                   | Solubility: Methanol, CH <sub>2</sub> Cl <sub>2</sub> |                |                                                               |             |
|                                                                                   |                   | Thermal Stability: Yes                                |                |                                                               |             |
|                                                                                   |                   | Toxicity: NA                                          |                |                                                               |             |
| Reactivity: Stable                                                                |                   |                                                       |                |                                                               |             |
| <b>GC Conditions:</b>                                                             |                   | <b>Analysis Requested</b>                             |                |                                                               |             |
|                                                                                   |                   | EI                                                    | CI             | MALDI                                                         | ESI         |
| Low Resolution Nominal Mass                                                       |                   |                                                       |                |                                                               |             |
| High Resolution Accurate Mass                                                     |                   |                                                       |                |                                                               | ✓           |
| <b>Special Sample Considerations:</b>                                             |                   | +Ve                                                   |                |                                                               |             |
|                                                                                   |                   | -Ve                                                   |                |                                                               |             |
|                                                                                   |                   | GCMS                                                  |                |                                                               |             |
|                                                                                   |                   | LCMS                                                  |                |                                                               |             |
| <b>Instrument Used</b>                                                            |                   | <b>Conditions Used</b>                                |                | <b>Operator Comments</b>                                      |             |
| VG 70SE                                                                           |                   | Source Temp:                                          |                | ESI neg (M-H) <sup>-</sup><br><del>175.1142</del><br>175.1133 |             |
| Finnigan MAT 95                                                                   |                   | Acc. Voltage:                                         |                |                                                               |             |
| Extrel FTMS 2001                                                                  |                   | Resolution:                                           |                |                                                               |             |
| Bruker Reflex III                                                                 |                   | Scan Range:                                           |                |                                                               |             |
| Bruker BioTOF II                                                                  |                   | Gas Used:                                             |                |                                                               |             |
| Log #:                                                                            | Analyst:          | Analysis Date:                                        |                | Analyses Run:                                                 | Total Cost: |

Not sure  
may  
need  
CI : (

97900

HTG3-172P

chresi

Kyle Kalstabakken

5/15/2012 10:25:47 AM

# Display Report

## Analysis Info

Analysis Name Z:\mslab\97900\8hi\_res  
Method negative\_40212.tofpar  
Sample Name 97900  
Comment

Acquisition Date 5/15/2012 2:02:59 PM

Operator operator name  
Instrument BioTOF II

## Acquisition Parameter

|      |        |     |     |         |        |
|------|--------|-----|-----|---------|--------|
| n/a  | n/a    | n/a | n/a | detbias | 1700 V |
| EndP | 3000 V | n/a | n/a | n/a     | n/a    |

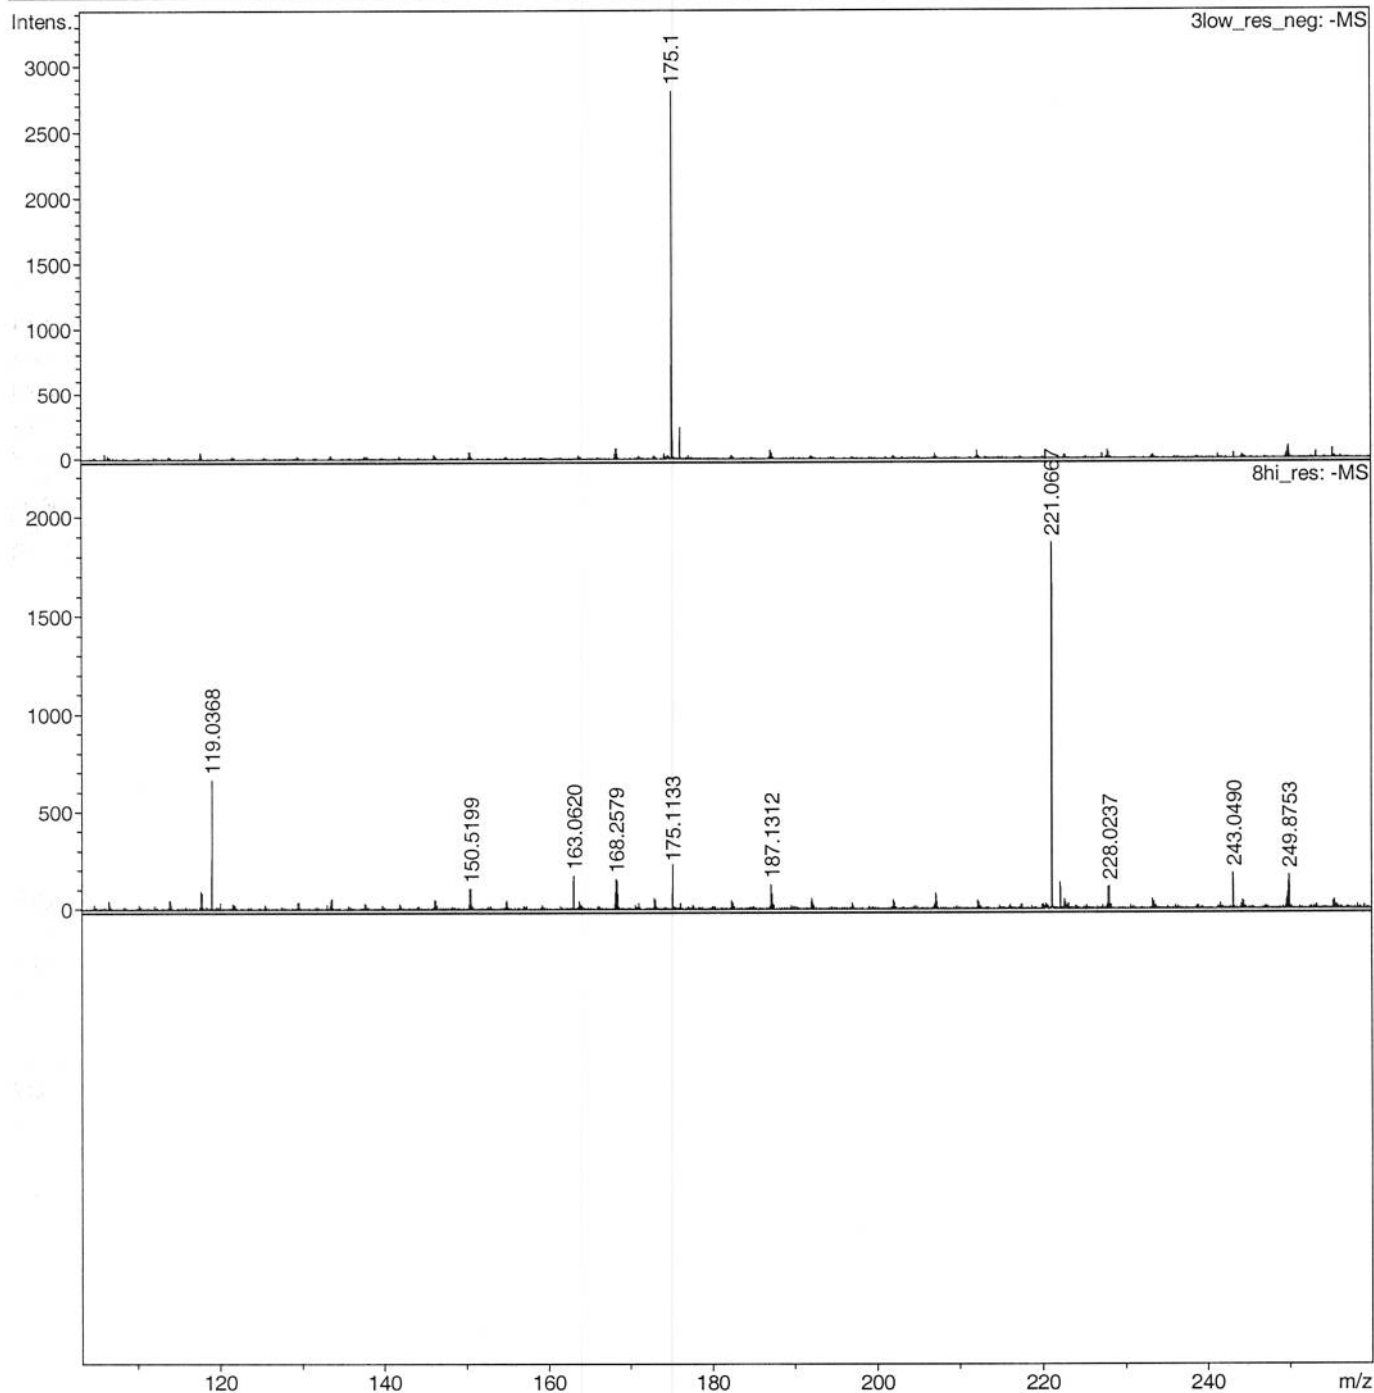

**U of M****University of Minnesota Department of Chemistry****Mass Spectrometry Service Laboratory**

email: mslab@chem.umn.edu

**Submit Sample To:** Mass Spectrometry Facility  
207 Pleasant St. SE  
Minneapolis, MN 55455  
Phone: (612)-625-8099  
FAX: (612)-626-7541

|                                                                                   |                   |                                                                     |                |                                                          |             |   |
|-----------------------------------------------------------------------------------|-------------------|---------------------------------------------------------------------|----------------|----------------------------------------------------------|-------------|---|
| Name: Giang Hoang                                                                 |                   | Phone: 612-625-3628                                                 |                |                                                          |             |   |
| Email: hoang070@umn.edu                                                           | Send Results? Yes | FAX:                                                                | FAX Results? N |                                                          |             |   |
| P.I./Advisor: Chris Douglas                                                       |                   | U of M Budget # 519-1015 <b>519-1015</b>                            |                |                                                          |             |   |
| Company/University: Department of Chemistry<br>University of Minnesota            |                   | P.O.# (For non-U of M Clients)                                      |                |                                                          |             |   |
| Shipping Address:                                                                 |                   | Billing Address:                                                    |                |                                                          |             |   |
| Sample Label: <b>HTG3-44P.</b>                                                    |                   | Molecular Weight: <b>268.1099</b>                                   |                |                                                          |             |   |
| 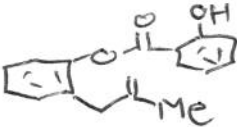 |                   | Molecular Formula: <b>C<sub>17</sub>H<sub>16</sub>O<sub>3</sub></b> |                |                                                          |             |   |
|                                                                                   |                   | Melting/Boiling Point: NA                                           |                |                                                          |             |   |
|                                                                                   |                   | Solubility: Methanol, CH <sub>2</sub> Cl <sub>2</sub>               |                |                                                          |             |   |
|                                                                                   |                   | Thermal Stability: Yes                                              |                |                                                          |             |   |
|                                                                                   |                   | Toxicity: NA                                                        |                |                                                          |             |   |
| Reactivity: Stable                                                                |                   |                                                                     |                |                                                          |             |   |
| <b>GC Conditions:</b>                                                             |                   | <b>Analysis Requested</b>                                           |                |                                                          |             |   |
|                                                                                   |                   | EI                                                                  | CI             | MALDI                                                    | ESI         |   |
|                                                                                   |                   | Low Resolution<br>Nominal Mass                                      |                |                                                          |             |   |
|                                                                                   |                   | High Resolution<br>Accurate Mass                                    |                |                                                          |             | ✓ |
| <b>Special Sample Considerations:</b>                                             |                   | +Ve                                                                 |                |                                                          |             |   |
|                                                                                   |                   | -Ve                                                                 |                |                                                          |             |   |
|                                                                                   |                   | GCMS                                                                |                |                                                          |             |   |
|                                                                                   |                   | LCMS                                                                |                |                                                          |             |   |
| <b>Instrument Used</b>                                                            |                   | <b>Conditions Used</b>                                              |                | <b>Operator Comments</b>                                 |             |   |
| VG 70SE                                                                           |                   | Source Temp:                                                        |                | <b>ESI pos [M+Na]<sup>+</sup></b><br><br><b>291.0981</b> |             |   |
| Finnigan MAT 95                                                                   |                   | Acc. Voltage:                                                       |                |                                                          |             |   |
| Extrel FTMS 2001                                                                  |                   | Resolution:                                                         |                |                                                          |             |   |
| Bruker Reflex III                                                                 |                   | Scan Range:                                                         |                |                                                          |             |   |
| Bruker BioTOF II                                                                  |                   | Gas Used:                                                           |                |                                                          |             |   |
| Log #:                                                                            | Analyst:          | Analysis Date:                                                      |                | Analyses Run:                                            | Total Cost: |   |

97902  
HTG3-44P  
chresi  
Kyle Kalstabakken  
5/15/2012 10:29:02 AM

# Display Report

## Analysis Info

Analysis Name Z:\mslab\97902\5hi\_res  
Method positive\_40212.tofpar  
Sample Name 97902  
Comment

Acquisition Date 5/17/2012 1:50:16 PM

Operator operator name  
Instrument BioTOF II

## Acquisition Parameter

|      |         |     |     |         |        |
|------|---------|-----|-----|---------|--------|
| n/a  | n/a     | n/a | n/a | detbias | 1750 V |
| EndP | -4000 V | n/a | n/a | n/a     | n/a    |

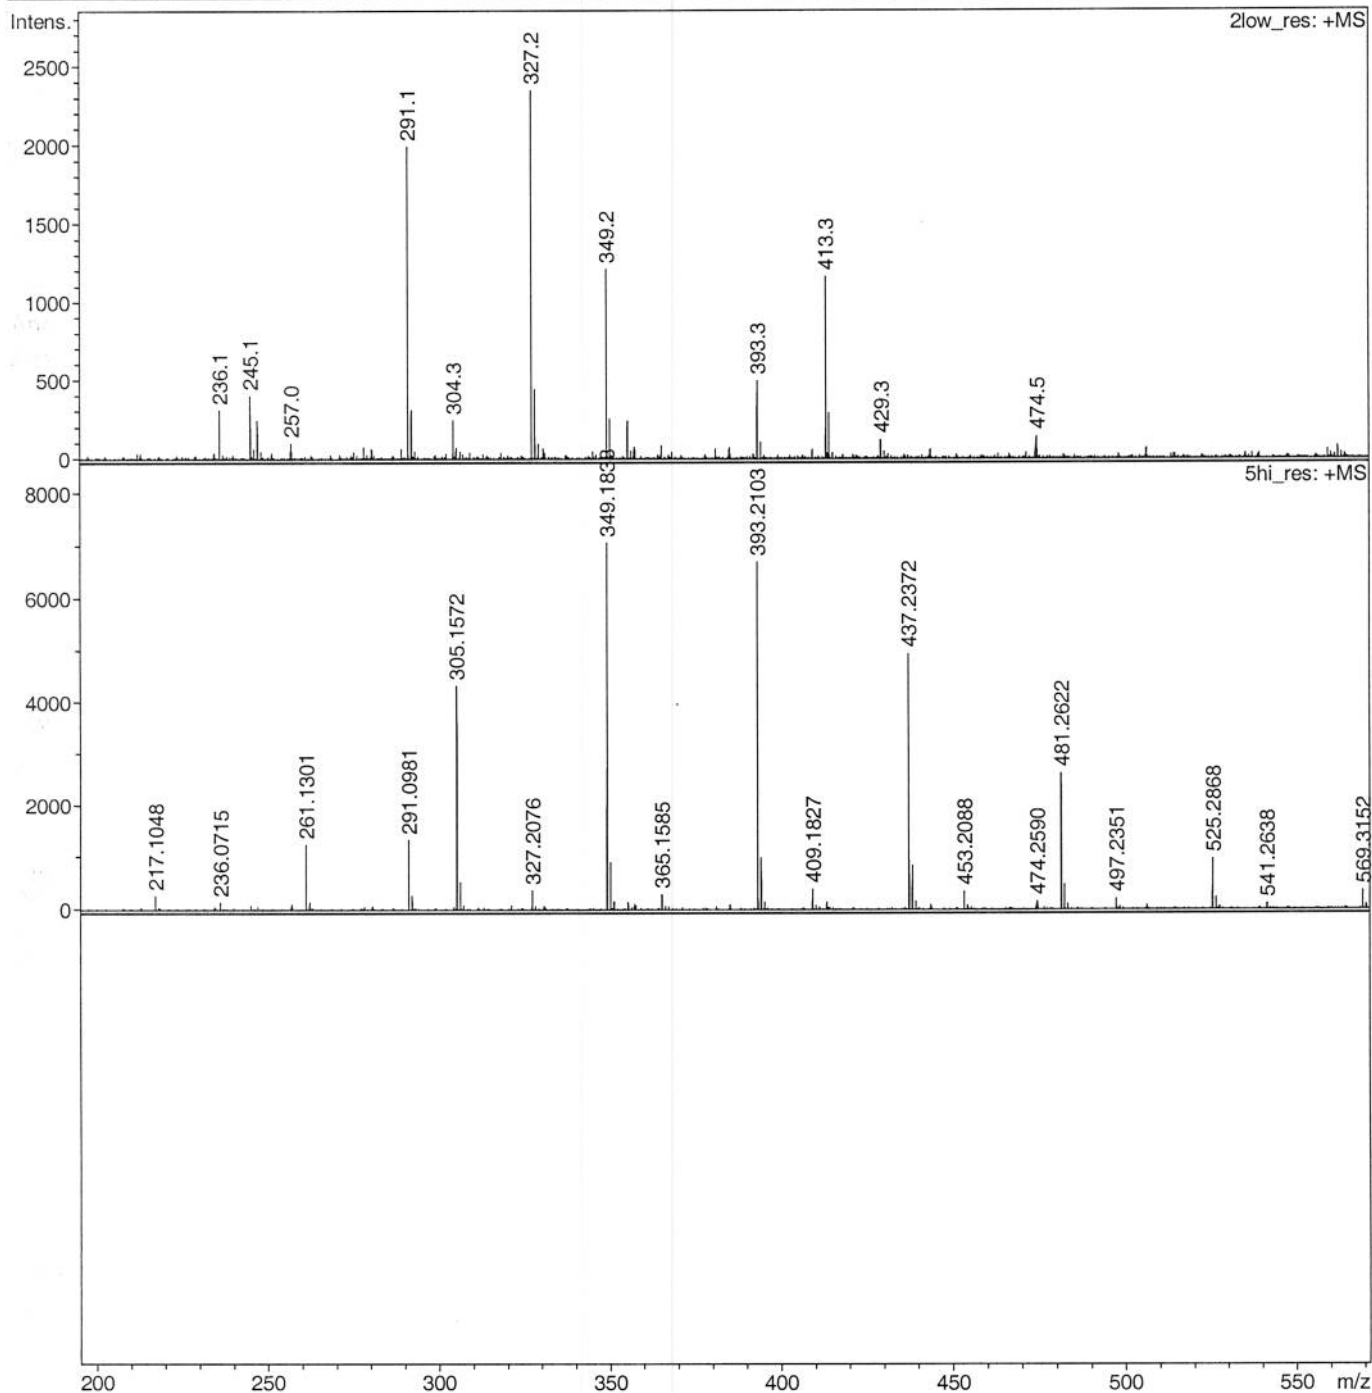

**U of M****University of Minnesota Department of Chemistry****Mass Spectrometry Service Laboratory**

email: mslab@chem.umn.edu

**Submit Sample To:** Mass Spectrometry Facility  
207 Pleasant St. SE  
Minneapolis, MN 55455  
Phone: (612)-625-8099  
FAX : (612)-626-7541

|                                                                                   |                   |                                                                   |                |                                         |             |
|-----------------------------------------------------------------------------------|-------------------|-------------------------------------------------------------------|----------------|-----------------------------------------|-------------|
| Name: Giang Hoang                                                                 |                   | Phone: 612-625-3628                                               |                |                                         |             |
| Email: hoang070@umn.edu                                                           | Send Results? Yes | FAX:                                                              | FAX Results? N |                                         |             |
| P.I./Advisor: Chris Douglas                                                       |                   | U of M Budget # 519-1005 519-1015                                 |                |                                         |             |
| Company/University: Department of Chemistry<br>University of Minnesota            |                   | P.O.# (For non-U of M Clients)                                    |                |                                         |             |
| Shipping Address:                                                                 |                   | Billing Address:                                                  |                |                                         |             |
| Sample Label: HTG3-61P                                                            |                   | Molecular Weight: 268.1099                                        |                |                                         |             |
| 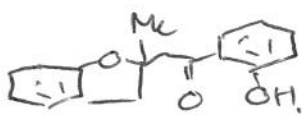 |                   | Molecular Formula: C <sub>17</sub> H <sub>16</sub> O <sub>3</sub> |                |                                         |             |
|                                                                                   |                   | Melting/Boiling Point: NA                                         |                |                                         |             |
|                                                                                   |                   | Solubility: Methanol, CH <sub>2</sub> Cl <sub>2</sub>             |                |                                         |             |
|                                                                                   |                   | Thermal Stability: Yes                                            |                |                                         |             |
|                                                                                   |                   | Toxicity: NA                                                      |                |                                         |             |
| Reactivity: Stable                                                                |                   |                                                                   |                |                                         |             |
| <b>GC Conditions:</b>                                                             |                   | <b>Analysis Requested</b>                                         |                |                                         |             |
|                                                                                   |                   | EI                                                                | CI             | MALDI                                   | ESI         |
| Low Resolution<br>Nominal Mass                                                    |                   |                                                                   |                |                                         |             |
| High Resolution<br>Accurate Mass                                                  |                   |                                                                   |                |                                         | ✓           |
| <b>Special Sample Considerations:</b>                                             |                   | +Ve                                                               |                |                                         |             |
|                                                                                   |                   | -Ve                                                               |                |                                         |             |
|                                                                                   |                   | GCMS                                                              |                |                                         |             |
|                                                                                   |                   | LCMS                                                              |                |                                         |             |
| <b>Instrument Used</b>                                                            |                   | <b>Conditions Used</b>                                            |                | <b>Operator Comments</b>                |             |
| VG 70SE                                                                           |                   | Source Temp:                                                      |                | ESI pos [M+Na] <sup>+</sup><br>291.0989 |             |
| Finnigan MAT 95                                                                   |                   | Acc. Voltage:                                                     |                |                                         |             |
| Extrel FTMS 2001                                                                  |                   | Resolution:                                                       |                |                                         |             |
| Bruker Reflex III                                                                 |                   | Scan Range:                                                       |                |                                         |             |
| Bruker BioTOF II                                                                  |                   | Gas Used:                                                         |                |                                         |             |
| Log #:                                                                            | Analyst:          | Analysis Date:                                                    |                | Analyses Run:                           | Total Cost: |

97901  
HTG3-61P  
chresi  
Kyle Kalstabakken  
5/15/2012 10:27:59 AM

# Display Report

## Analysis Info

Analysis Name Z:\mslab\97901\2low\_res  
Method positive\_40212.tofpar  
Sample Name 97901  
Comment

Acquisition Date 5/15/2012 2:10:08 PM

Operator operator name  
Instrument BioTOF II

## Acquisition Parameter

|      |         |     |     |         |        |
|------|---------|-----|-----|---------|--------|
| n/a  | n/a     | n/a | n/a | detbias | 1750 V |
| EndP | -4000 V | n/a | n/a | n/a     | n/a    |

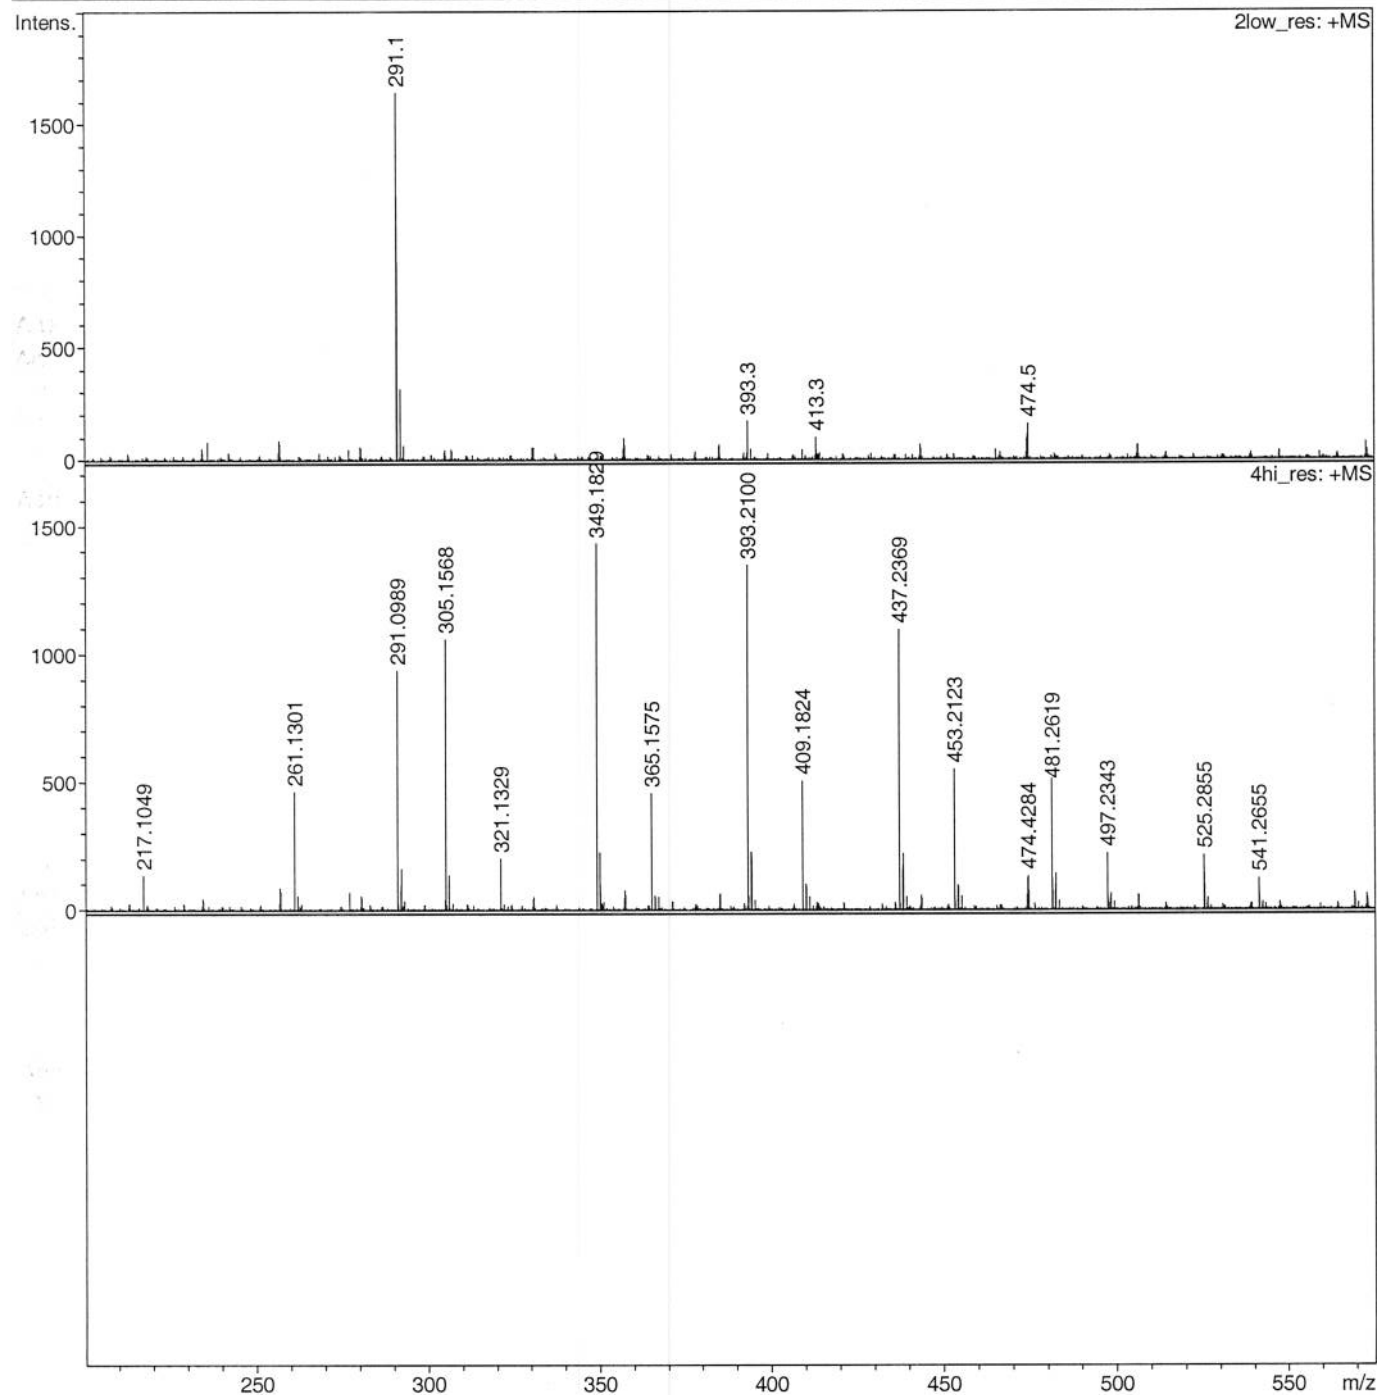

**U of M****University of Minnesota Department of Chemistry****Mass Spectrometry Service Laboratory**

email: chmmslab@umn.edu

**Submit Sample To:** Mass Spectrometry Facility  
207 Pleasant St. SE  
Minneapolis, MN 55455  
Phone: (612)-625-8099  
FAX : (612)-626-7541

|                                                                                   |  |                                                                     |  |                      |  |       |  |     |  |
|-----------------------------------------------------------------------------------|--|---------------------------------------------------------------------|--|----------------------|--|-------|--|-----|--|
| Name: Giang Hoang                                                                 |  | Phone: 612-625-3628                                                 |  | Date: 05/01/2012     |  |       |  |     |  |
| Email: hoang070@umn.edu                                                           |  | Email Results? Yes                                                  |  | FAX: FAX Results? No |  |       |  |     |  |
| P.I./Advisor: Chris Douglas                                                       |  | U of M Budget # 519-1015                                            |  |                      |  |       |  |     |  |
| Company/University: U of M                                                        |  | P.O.# (For non-U of M Clients)                                      |  |                      |  |       |  |     |  |
| Shipping Address:                                                                 |  | Billing Address:                                                    |  |                      |  |       |  |     |  |
| Sample Label: <i>C<sub>18</sub>H<sub>18</sub>O<sub>3</sub> HTG3-114</i>           |  | Molecular Weight: <i>282.1256</i>                                   |  |                      |  |       |  |     |  |
| 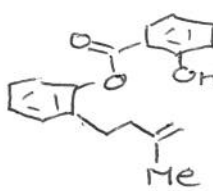 |  | Molecular Formula: <i>C<sub>18</sub>H<sub>18</sub>O<sub>3</sub></i> |  |                      |  |       |  |     |  |
|                                                                                   |  | Melting/Boiling Point: <i>N/A</i>                                   |  |                      |  |       |  |     |  |
|                                                                                   |  | Solubility: <i>MeOH, CH<sub>2</sub>Cl<sub>2</sub>, toluene</i>      |  |                      |  |       |  |     |  |
|                                                                                   |  | Thermal Stability: <i>Yes</i>                                       |  |                      |  |       |  |     |  |
|                                                                                   |  | Toxicity: <i>No</i>                                                 |  |                      |  |       |  |     |  |
|                                                                                   |  | Reactivity: <i>No</i>                                               |  |                      |  |       |  |     |  |
| <b>Chromatography Conditions:</b>                                                 |  | <b>Analysis Requested</b>                                           |  |                      |  |       |  |     |  |
|                                                                                   |  | EI                                                                  |  | CI                   |  | MALDI |  | ESI |  |
|                                                                                   |  | Low Resolution Nominal Mass                                         |  |                      |  |       |  |     |  |
|                                                                                   |  | High Resolution Accurate Mass                                       |  |                      |  |       |  | ✓   |  |
| <b>Special Sample Considerations:</b>                                             |  | +Ve                                                                 |  |                      |  |       |  |     |  |
|                                                                                   |  | -Ve                                                                 |  |                      |  |       |  |     |  |
|                                                                                   |  | GCMS                                                                |  |                      |  |       |  |     |  |
|                                                                                   |  | LCMS                                                                |  |                      |  |       |  |     |  |

| Instrument Used    |          | Conditions Used |  | Operator Comments                                       |             |
|--------------------|----------|-----------------|--|---------------------------------------------------------|-------------|
| Finnigan MAT 95    |          | Source Temp:    |  | <i>[M+N<sub>2</sub>]<sup>+</sup></i><br><i>305.1162</i> |             |
| Bruker Reflex III  |          | Acc. Voltage:   |  |                                                         |             |
| Bruker BioTOF II   |          | Resolution:     |  |                                                         |             |
| Waters Triple Quad |          | Scan Range:     |  |                                                         |             |
| Waters Synapt G2   |          | Gas Used:       |  |                                                         |             |
| Log #:             | Analyst: | Analysis Date:  |  | Analyses Run:                                           | Total Cost: |

97811

HTG3-114

chresi

Kyle Kalstabakken

5/2/2012 2:56:15 PM

# Display Report

## Analysis Info

Analysis Name Z:\mslab\97811\7hi\_res  
Method positive\_40212.tofpar  
Sample Name 97811  
Comment

Acquisition Date 5/2/2012 3:32:11 PM

Operator operator name  
Instrument BioTOF II

## Acquisition Parameter

|      |         |     |     |         |        |
|------|---------|-----|-----|---------|--------|
| n/a  | n/a     | n/a | n/a | detbias | 1750 V |
| EndP | -4000 V | n/a | n/a | n/a     | n/a    |

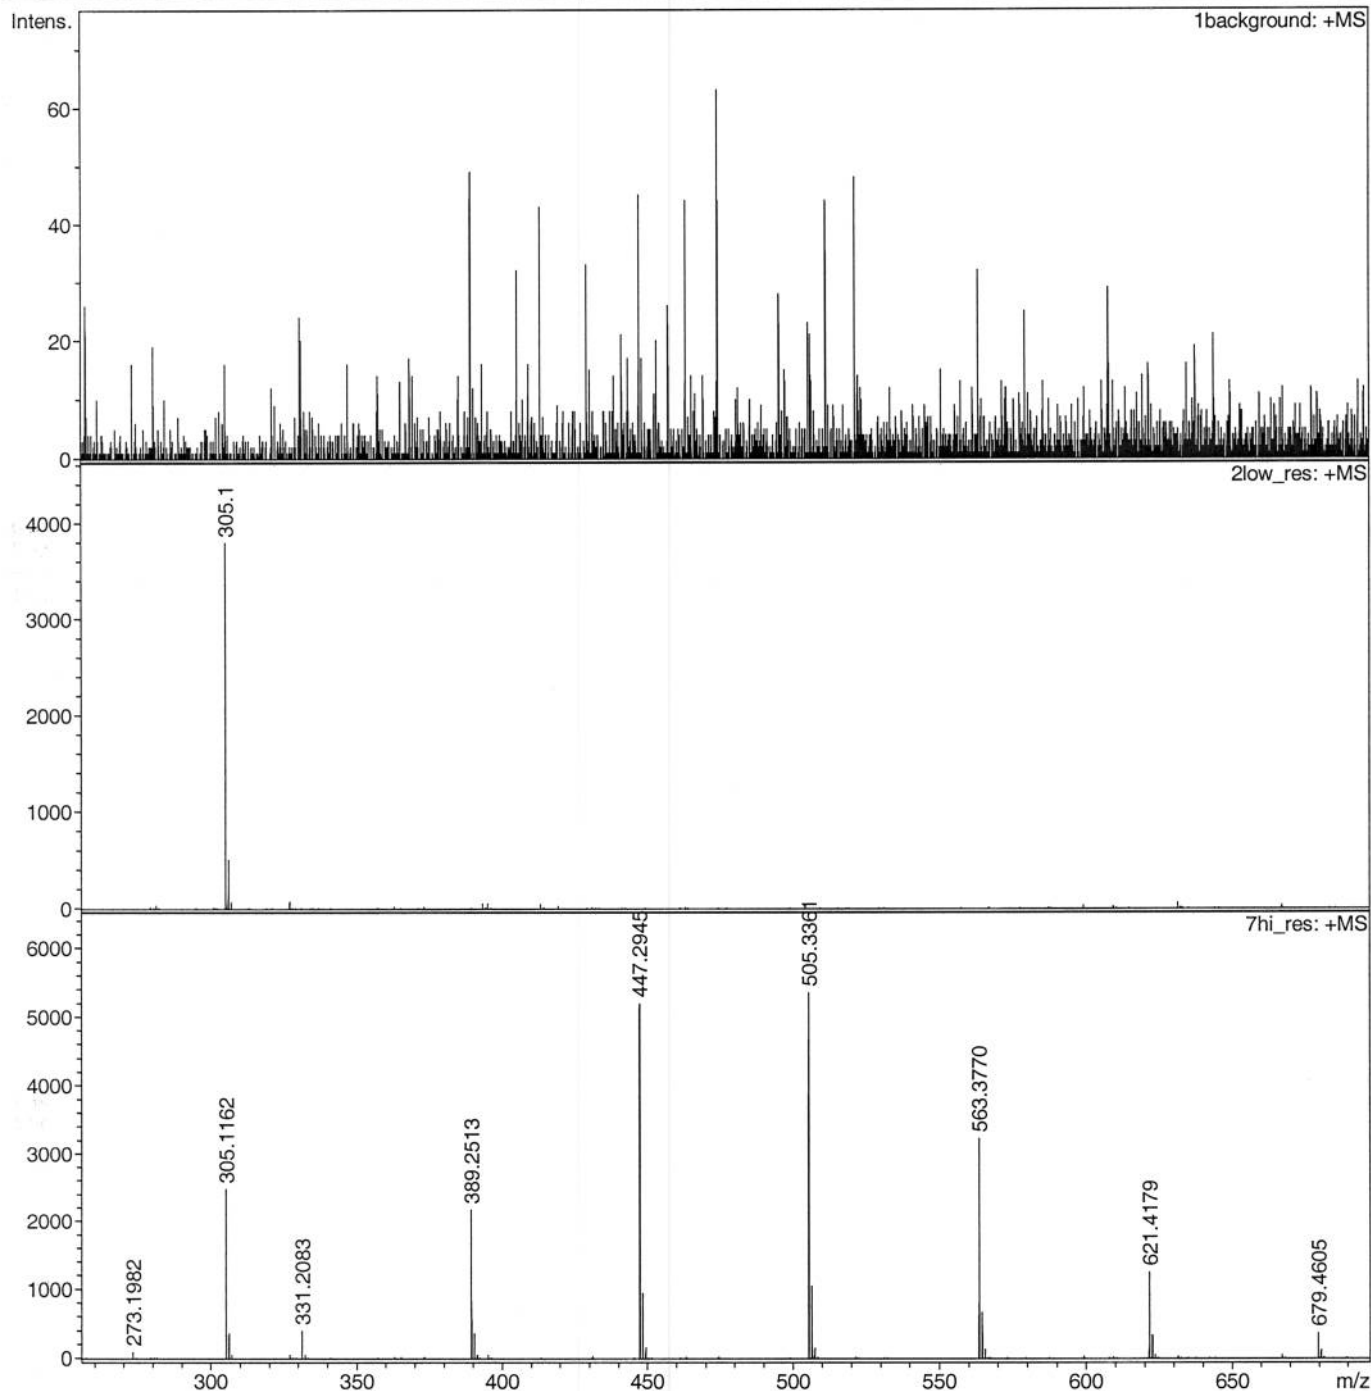

**U of M****University of Minnesota Department of Chemistry****Mass Spectrometry Service Laboratory**

email: chmmslab@umn.edu

**Submit Sample To:** Mass Spectrometry Facility  
207 Pleasant St. SE  
Minneapolis, MN 55455  
Phone: (612)-625-8099  
FAX: (612)-626-7541

|                                                                                                                                        |          |                                                                   |    |                                            |             |   |
|----------------------------------------------------------------------------------------------------------------------------------------|----------|-------------------------------------------------------------------|----|--------------------------------------------|-------------|---|
| Name: Giang Hoang                                                                                                                      |          | Phone: 612-625-3628                                               |    | Date: 05/01/2012                           |             |   |
| Email: hoang070@umn.edu                                                                                                                |          | Email Results? Yes                                                |    | FAX: FAX Results? No                       |             |   |
| P.I./Advisor: Chris Douglas                                                                                                            |          | U of M Budget # 519-1015                                          |    |                                            |             |   |
| Company/University: U of M                                                                                                             |          | P.O.# (For non-U of M Clients)                                    |    |                                            |             |   |
| Shipping Address:                                                                                                                      |          | Billing Address:                                                  |    |                                            |             |   |
| Sample Label: HTG3-96                                                                                                                  |          | Molecular Weight: 282.1256                                        |    |                                            |             |   |
| <div>Structural Formula or Sample Composition:</div> 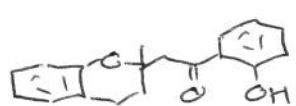 |          | Molecular Formula: C <sub>18</sub> H <sub>18</sub> O <sub>3</sub> |    |                                            |             |   |
|                                                                                                                                        |          | Melting/Boiling Point: —                                          |    |                                            |             |   |
|                                                                                                                                        |          | Solubility: MeOH, CH <sub>2</sub> Cl <sub>2</sub> , EA ...        |    |                                            |             |   |
|                                                                                                                                        |          | Thermal Stability: Yes                                            |    |                                            |             |   |
|                                                                                                                                        |          | Toxicity: NA                                                      |    |                                            |             |   |
| Reactivity: —                                                                                                                          |          |                                                                   |    |                                            |             |   |
| <b>Chromatography Conditions:</b>                                                                                                      |          | <b>Analysis Requested</b>                                         |    |                                            |             |   |
|                                                                                                                                        |          | EI                                                                | CI | MALDI                                      | ESI         |   |
|                                                                                                                                        |          | Low Resolution Nominal Mass                                       |    |                                            |             |   |
|                                                                                                                                        |          | High Resolution Accurate Mass                                     |    |                                            |             | ✓ |
| <b>Special Sample Considerations:</b>                                                                                                  |          | +Ve                                                               |    |                                            |             |   |
|                                                                                                                                        |          | -Ve                                                               |    |                                            |             |   |
|                                                                                                                                        |          | GCMS                                                              |    |                                            |             |   |
|                                                                                                                                        |          | LCMS                                                              |    |                                            |             |   |
| <b>Instrument Used</b>                                                                                                                 |          | <b>Conditions Used</b>                                            |    | <b>Operator Comments</b>                   |             |   |
| Finnigan MAT 95                                                                                                                        |          | Source Temp:                                                      |    | <div>[M+Na]<sup>+</sup><br/>305.1161</div> |             |   |
| Bruker Reflex III                                                                                                                      |          | Acc. Voltage:                                                     |    |                                            |             |   |
| Bruker BioTOF II                                                                                                                       |          | Resolution:                                                       |    |                                            |             |   |
| Waters Triple Quad                                                                                                                     |          | Scan Range:                                                       |    |                                            |             |   |
| Waters Synapt G2                                                                                                                       |          | Gas Used:                                                         |    |                                            |             |   |
| Log #:                                                                                                                                 | Analyst: | Analysis Date:                                                    |    | Analyses Run:                              | Total Cost: |   |

97810

HTG3-96

chresi

Kyle Kalstabakken

5/2/2012 2:53:24 PM

# Display Report

## Analysis Info

Analysis Name Z:\mslab\97810\7hi\_res  
Method positive\_40212.tofpar  
Sample Name 97810  
Comment

Acquisition Date 5/2/2012 3:25:54 PM

Operator operator name  
Instrument BioTOF II

## Acquisition Parameter

|      |         |     |     |         |        |
|------|---------|-----|-----|---------|--------|
| n/a  | n/a     | n/a | n/a | detbias | 1750 V |
| EndP | -4000 V | n/a | n/a | n/a     | n/a    |

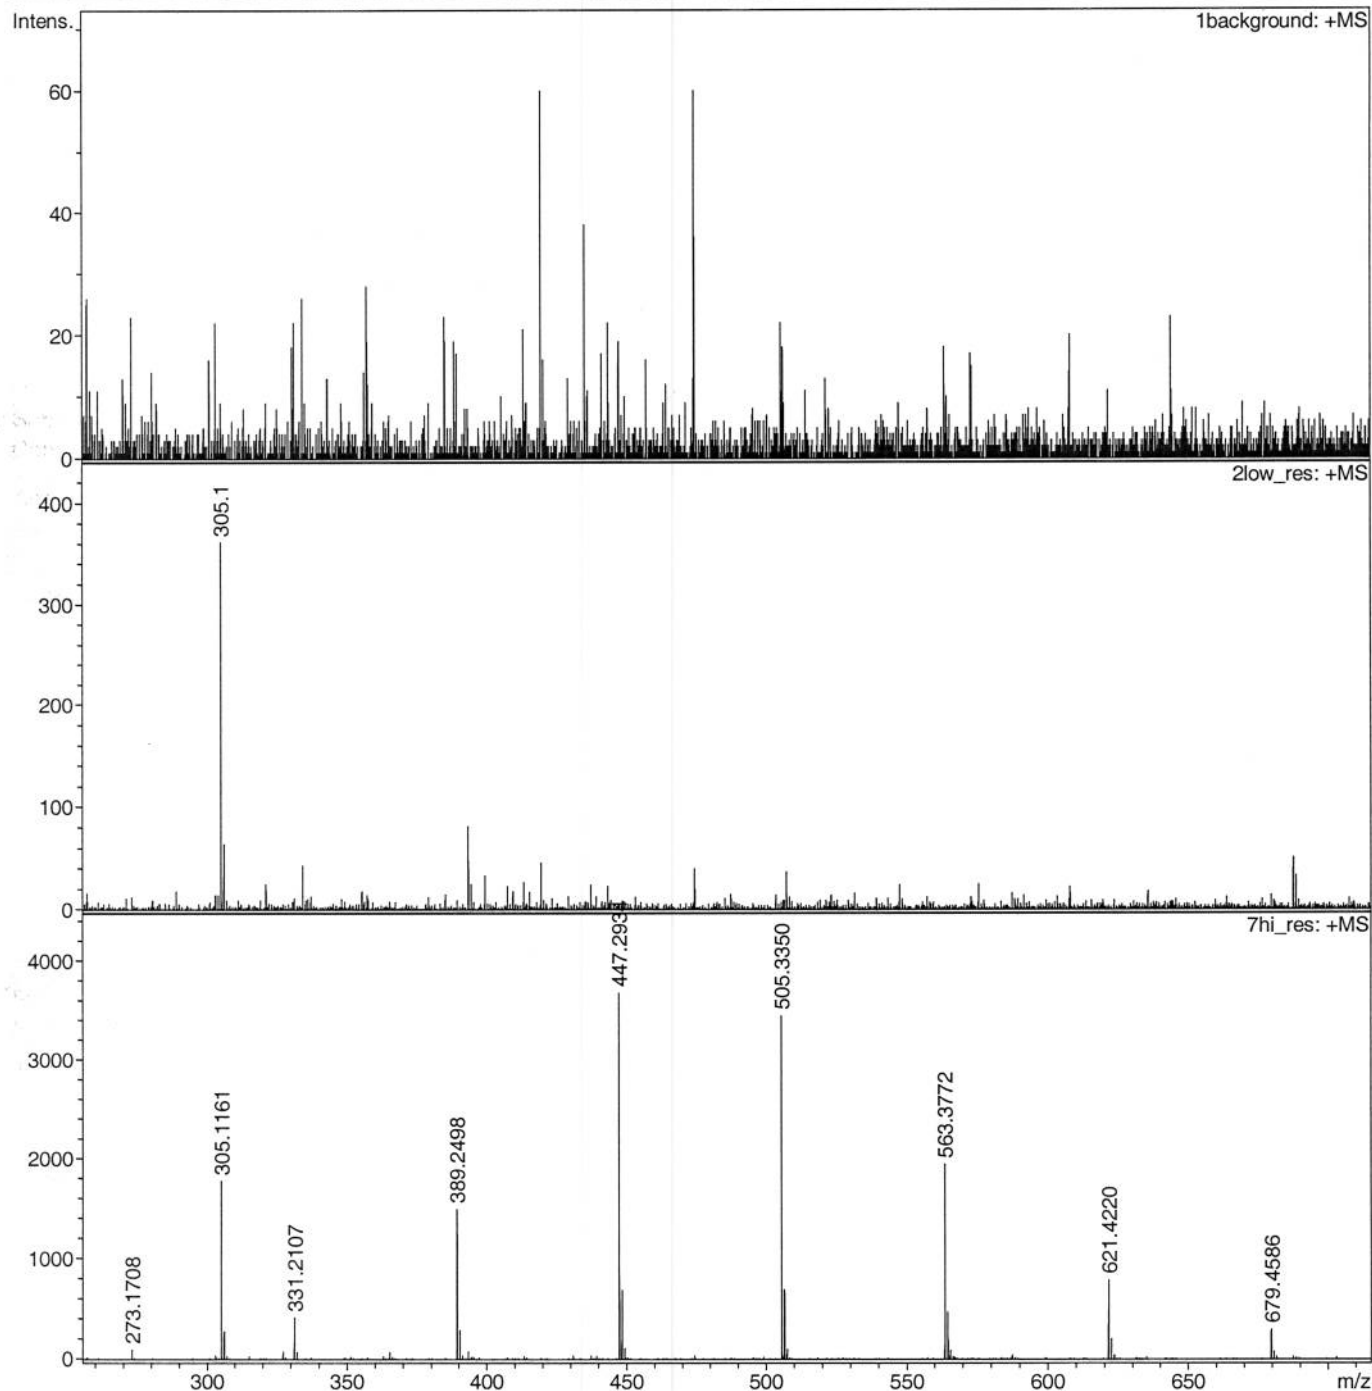

**U of M****University of Minnesota Department of Chemistry****Mass Spectrometry Service Laboratory**

email: chmmslab@umn.edu

**Submit Sample To:** Mass Spectrometry Facility  
207 Pleasant St. SE  
Minneapolis, MN 55455  
Phone: (612)-625-8099  
FAX: (612)-626-7541

| Name: Giang Hoang                                                                 |          | Phone: 612-625-3628                                                                                                                                                                                                                                                                             |    | Date: 05/01/2012         |             |     |    |    |       |     |                             |  |  |  |  |                               |  |  |  |   |
|-----------------------------------------------------------------------------------|----------|-------------------------------------------------------------------------------------------------------------------------------------------------------------------------------------------------------------------------------------------------------------------------------------------------|----|--------------------------|-------------|-----|----|----|-------|-----|-----------------------------|--|--|--|--|-------------------------------|--|--|--|---|
| Email: hoang070@umn.edu                                                           |          | Email Results? Yes                                                                                                                                                                                                                                                                              |    | FAX: FAX Results? No     |             |     |    |    |       |     |                             |  |  |  |  |                               |  |  |  |   |
| P.I./Advisor: Chris Douglas                                                       |          | U of M Budget # 519-1015                                                                                                                                                                                                                                                                        |    |                          |             |     |    |    |       |     |                             |  |  |  |  |                               |  |  |  |   |
| Company/University: U of M                                                        |          | P.O.# (For non-U of M Clients)                                                                                                                                                                                                                                                                  |    |                          |             |     |    |    |       |     |                             |  |  |  |  |                               |  |  |  |   |
| Shipping Address:                                                                 |          | Billing Address:                                                                                                                                                                                                                                                                                |    |                          |             |     |    |    |       |     |                             |  |  |  |  |                               |  |  |  |   |
| Sample Label: HTG3-189                                                            |          | Molecular Weight: 350.1130                                                                                                                                                                                                                                                                      |    |                          |             |     |    |    |       |     |                             |  |  |  |  |                               |  |  |  |   |
| 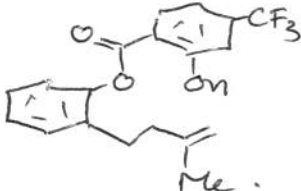 |          | Molecular Formula: C <sub>19</sub> H <sub>17</sub> F <sub>3</sub> O <sub>3</sub>                                                                                                                                                                                                                |    |                          |             |     |    |    |       |     |                             |  |  |  |  |                               |  |  |  |   |
|                                                                                   |          | Melting/Boiling Point: —                                                                                                                                                                                                                                                                        |    |                          |             |     |    |    |       |     |                             |  |  |  |  |                               |  |  |  |   |
|                                                                                   |          | Solubility: MeOH, CH <sub>2</sub> Cl <sub>2</sub> , CH <sub>3</sub> CN                                                                                                                                                                                                                          |    |                          |             |     |    |    |       |     |                             |  |  |  |  |                               |  |  |  |   |
|                                                                                   |          | Thermal Stability: Yes                                                                                                                                                                                                                                                                          |    |                          |             |     |    |    |       |     |                             |  |  |  |  |                               |  |  |  |   |
|                                                                                   |          | Toxicity: —                                                                                                                                                                                                                                                                                     |    |                          |             |     |    |    |       |     |                             |  |  |  |  |                               |  |  |  |   |
| Reactivity: —                                                                     |          |                                                                                                                                                                                                                                                                                                 |    |                          |             |     |    |    |       |     |                             |  |  |  |  |                               |  |  |  |   |
| <b>Chromatography Conditions:</b>                                                 |          | <b>Analysis Requested</b>                                                                                                                                                                                                                                                                       |    |                          |             |     |    |    |       |     |                             |  |  |  |  |                               |  |  |  |   |
|                                                                                   |          | <table border="1"><thead><tr><th></th><th>EI</th><th>CI</th><th>MALDI</th><th>ESI</th></tr></thead><tbody><tr><td>Low Resolution Nominal Mass</td><td></td><td></td><td></td><td></td></tr><tr><td>High Resolution Accurate Mass</td><td></td><td></td><td></td><td>✓</td></tr></tbody></table> |    |                          |             |     | EI | CI | MALDI | ESI | Low Resolution Nominal Mass |  |  |  |  | High Resolution Accurate Mass |  |  |  | ✓ |
|                                                                                   |          |                                                                                                                                                                                                                                                                                                 | EI | CI                       | MALDI       | ESI |    |    |       |     |                             |  |  |  |  |                               |  |  |  |   |
|                                                                                   |          | Low Resolution Nominal Mass                                                                                                                                                                                                                                                                     |    |                          |             |     |    |    |       |     |                             |  |  |  |  |                               |  |  |  |   |
|                                                                                   |          | High Resolution Accurate Mass                                                                                                                                                                                                                                                                   |    |                          |             | ✓   |    |    |       |     |                             |  |  |  |  |                               |  |  |  |   |
| <b>Special Sample Considerations:</b>                                             |          |                                                                                                                                                                                                                                                                                                 |    |                          |             |     |    |    |       |     |                             |  |  |  |  |                               |  |  |  |   |
| +Ve                                                                               |          |                                                                                                                                                                                                                                                                                                 |    |                          |             |     |    |    |       |     |                             |  |  |  |  |                               |  |  |  |   |
| -Ve                                                                               |          |                                                                                                                                                                                                                                                                                                 |    |                          |             |     |    |    |       |     |                             |  |  |  |  |                               |  |  |  |   |
| GCMS                                                                              |          |                                                                                                                                                                                                                                                                                                 |    |                          |             |     |    |    |       |     |                             |  |  |  |  |                               |  |  |  |   |
| LCMS                                                                              |          |                                                                                                                                                                                                                                                                                                 |    |                          |             |     |    |    |       |     |                             |  |  |  |  |                               |  |  |  |   |
| <b>Instrument Used</b>                                                            |          | <b>Conditions Used</b>                                                                                                                                                                                                                                                                          |    | <b>Operator Comments</b> |             |     |    |    |       |     |                             |  |  |  |  |                               |  |  |  |   |
| Finnigan MAT 95                                                                   |          | Source Temp:                                                                                                                                                                                                                                                                                    |    | $[M+Na]^+$<br>373.1023   |             |     |    |    |       |     |                             |  |  |  |  |                               |  |  |  |   |
| Bruker Reflex III                                                                 |          | Acc. Voltage:                                                                                                                                                                                                                                                                                   |    |                          |             |     |    |    |       |     |                             |  |  |  |  |                               |  |  |  |   |
| Bruker BioTOF II                                                                  |          | Resolution:                                                                                                                                                                                                                                                                                     |    |                          |             |     |    |    |       |     |                             |  |  |  |  |                               |  |  |  |   |
| Waters Triple Quad                                                                |          | Scan Range:                                                                                                                                                                                                                                                                                     |    |                          |             |     |    |    |       |     |                             |  |  |  |  |                               |  |  |  |   |
| Waters Synapt G2                                                                  |          | Gas Used:                                                                                                                                                                                                                                                                                       |    |                          |             |     |    |    |       |     |                             |  |  |  |  |                               |  |  |  |   |
| Log #:                                                                            | Analyst: | Analysis Date:                                                                                                                                                                                                                                                                                  |    | Analyses Run:            | Total Cost: |     |    |    |       |     |                             |  |  |  |  |                               |  |  |  |   |

97813

HTG3-189

chresi

Kyle Kalstabakken

5/2/2012 2:58:31 PM

# Display Report

## Analysis Info

Analysis Name Z:\mslab\97813\3hi\_res  
Method positive\_40212.tofpar  
Sample Name 97813  
Comment

Acquisition Date 5/2/2012 3:50:01 PM

Operator operator name  
Instrument BioTOF II

## Acquisition Parameter

|      |         |     |     |         |        |
|------|---------|-----|-----|---------|--------|
| n/a  | n/a     | n/a | n/a | detbias | 1750 V |
| EndP | -4000 V | n/a | n/a | n/a     | n/a    |

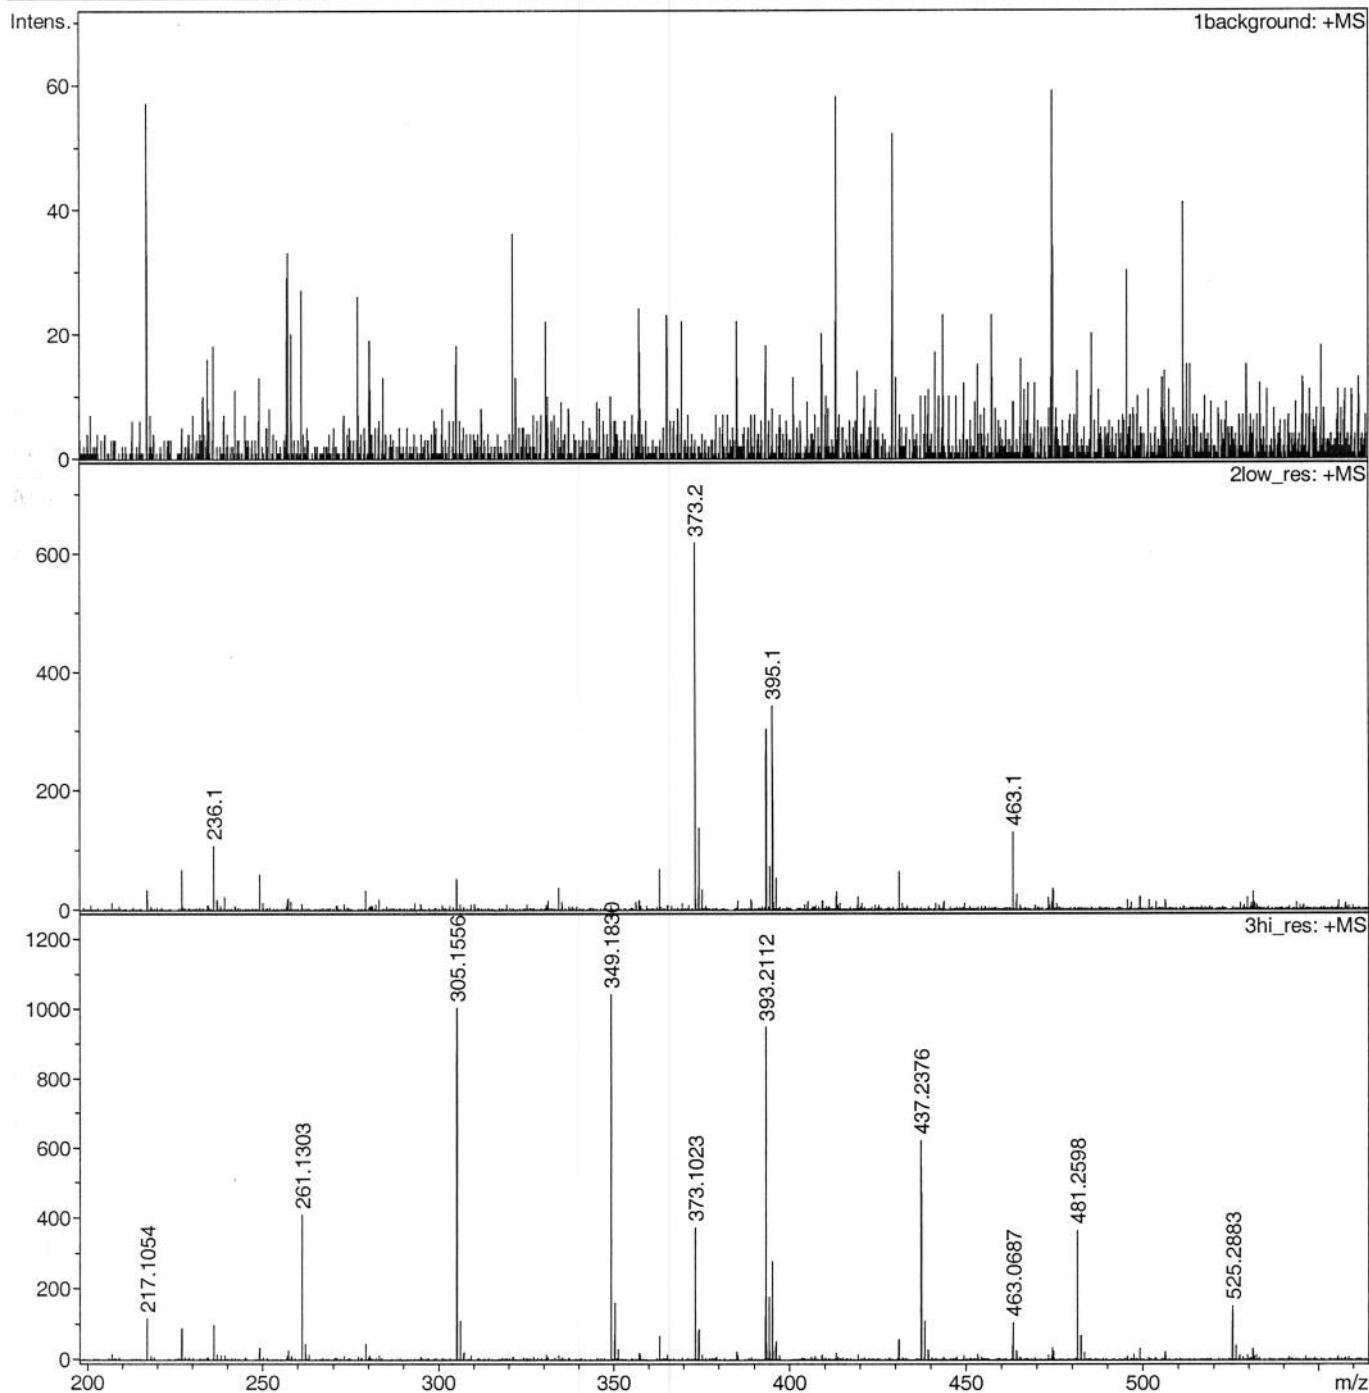

**U of M****University of Minnesota Department of Chemistry****Mass Spectrometry Service Laboratory**

email: chmmslab@umn.edu

**Submit Sample To:** Mass Spectrometry Facility  
207 Pleasant St. SE  
Minneapolis, MN 55455  
Phone: (612)-625-8099  
FAX: (612)-626-7541

| Name: Giang Hoang                                                                                                                                                                                                                                                               |          | Phone: 612-625-3628                                                                                                                                                                                                                                                                             |    | Date: 05/01/2012           |             |     |    |    |       |     |                             |  |  |      |  |                               |  |  |      |   |  |  |  |
|---------------------------------------------------------------------------------------------------------------------------------------------------------------------------------------------------------------------------------------------------------------------------------|----------|-------------------------------------------------------------------------------------------------------------------------------------------------------------------------------------------------------------------------------------------------------------------------------------------------|----|----------------------------|-------------|-----|----|----|-------|-----|-----------------------------|--|--|------|--|-------------------------------|--|--|------|---|--|--|--|
| Email: hoang070@umn.edu                                                                                                                                                                                                                                                         |          | Email Results? Yes                                                                                                                                                                                                                                                                              |    | FAX: FAX Results? No       |             |     |    |    |       |     |                             |  |  |      |  |                               |  |  |      |   |  |  |  |
| P.I./Advisor: Chris Douglas                                                                                                                                                                                                                                                     |          | U of M Budget # 519-1015                                                                                                                                                                                                                                                                        |    |                            |             |     |    |    |       |     |                             |  |  |      |  |                               |  |  |      |   |  |  |  |
| Company/University: U of M                                                                                                                                                                                                                                                      |          | P.O.# (For non-U of M Clients)                                                                                                                                                                                                                                                                  |    |                            |             |     |    |    |       |     |                             |  |  |      |  |                               |  |  |      |   |  |  |  |
| Shipping Address:                                                                                                                                                                                                                                                               |          | Billing Address:                                                                                                                                                                                                                                                                                |    |                            |             |     |    |    |       |     |                             |  |  |      |  |                               |  |  |      |   |  |  |  |
| Sample Label: HTG3-196                                                                                                                                                                                                                                                          |          | Molecular Weight: 350.1130                                                                                                                                                                                                                                                                      |    |                            |             |     |    |    |       |     |                             |  |  |      |  |                               |  |  |      |   |  |  |  |
|                                                                                                                                                                                                |          | Molecular Formula: C <sub>19</sub> H <sub>17</sub> F <sub>3</sub> O <sub>3</sub>                                                                                                                                                                                                                |    |                            |             |     |    |    |       |     |                             |  |  |      |  |                               |  |  |      |   |  |  |  |
|                                                                                                                                                                                                                                                                                 |          | Melting/Boiling Point: -                                                                                                                                                                                                                                                                        |    |                            |             |     |    |    |       |     |                             |  |  |      |  |                               |  |  |      |   |  |  |  |
|                                                                                                                                                                                                                                                                                 |          | Solubility: MeOH, CH <sub>2</sub> Cl <sub>2</sub> , CH <sub>3</sub> CN                                                                                                                                                                                                                          |    |                            |             |     |    |    |       |     |                             |  |  |      |  |                               |  |  |      |   |  |  |  |
|                                                                                                                                                                                                                                                                                 |          | Thermal Stability: Yes                                                                                                                                                                                                                                                                          |    |                            |             |     |    |    |       |     |                             |  |  |      |  |                               |  |  |      |   |  |  |  |
|                                                                                                                                                                                                                                                                                 |          | Toxicity: -                                                                                                                                                                                                                                                                                     |    |                            |             |     |    |    |       |     |                             |  |  |      |  |                               |  |  |      |   |  |  |  |
| Reactivity: -                                                                                                                                                                                                                                                                   |          |                                                                                                                                                                                                                                                                                                 |    |                            |             |     |    |    |       |     |                             |  |  |      |  |                               |  |  |      |   |  |  |  |
| <b>Chromatography Conditions:</b>                                                                                                                                                                                                                                               |          | <b>Analysis Requested</b>                                                                                                                                                                                                                                                                       |    |                            |             |     |    |    |       |     |                             |  |  |      |  |                               |  |  |      |   |  |  |  |
|                                                                                                                                                                                                                                                                                 |          | <table border="1"><thead><tr><th></th><th>EI</th><th>CI</th><th>MALDI</th><th>ESI</th></tr></thead><tbody><tr><td>Low Resolution Nominal Mass</td><td></td><td></td><td></td><td></td></tr><tr><td>High Resolution Accurate Mass</td><td></td><td></td><td></td><td>✓</td></tr></tbody></table> |    |                            |             |     | EI | CI | MALDI | ESI | Low Resolution Nominal Mass |  |  |      |  | High Resolution Accurate Mass |  |  |      | ✓ |  |  |  |
|                                                                                                                                                                                                                                                                                 |          |                                                                                                                                                                                                                                                                                                 | EI | CI                         | MALDI       | ESI |    |    |       |     |                             |  |  |      |  |                               |  |  |      |   |  |  |  |
|                                                                                                                                                                                                                                                                                 |          | Low Resolution Nominal Mass                                                                                                                                                                                                                                                                     |    |                            |             |     |    |    |       |     |                             |  |  |      |  |                               |  |  |      |   |  |  |  |
| High Resolution Accurate Mass                                                                                                                                                                                                                                                   |          |                                                                                                                                                                                                                                                                                                 |    | ✓                          |             |     |    |    |       |     |                             |  |  |      |  |                               |  |  |      |   |  |  |  |
| <b>Special Sample Considerations:</b>                                                                                                                                                                                                                                           |          |                                                                                                                                                                                                                                                                                                 |    |                            |             |     |    |    |       |     |                             |  |  |      |  |                               |  |  |      |   |  |  |  |
| <table border="1"><tbody><tr><td>+Ve</td><td></td><td></td><td></td><td></td></tr><tr><td>-Ve</td><td></td><td></td><td></td><td></td></tr><tr><td>GCMS</td><td></td><td></td><td></td><td></td></tr><tr><td>LCMS</td><td></td><td></td><td></td><td></td></tr></tbody></table> |          |                                                                                                                                                                                                                                                                                                 |    | +Ve                        |             |     |    |    | -Ve   |     |                             |  |  | GCMS |  |                               |  |  | LCMS |   |  |  |  |
| +Ve                                                                                                                                                                                                                                                                             |          |                                                                                                                                                                                                                                                                                                 |    |                            |             |     |    |    |       |     |                             |  |  |      |  |                               |  |  |      |   |  |  |  |
| -Ve                                                                                                                                                                                                                                                                             |          |                                                                                                                                                                                                                                                                                                 |    |                            |             |     |    |    |       |     |                             |  |  |      |  |                               |  |  |      |   |  |  |  |
| GCMS                                                                                                                                                                                                                                                                            |          |                                                                                                                                                                                                                                                                                                 |    |                            |             |     |    |    |       |     |                             |  |  |      |  |                               |  |  |      |   |  |  |  |
| LCMS                                                                                                                                                                                                                                                                            |          |                                                                                                                                                                                                                                                                                                 |    |                            |             |     |    |    |       |     |                             |  |  |      |  |                               |  |  |      |   |  |  |  |
| <b>Instrument Used</b>                                                                                                                                                                                                                                                          |          | <b>Conditions Used</b>                                                                                                                                                                                                                                                                          |    | <b>Operator Comments</b>   |             |     |    |    |       |     |                             |  |  |      |  |                               |  |  |      |   |  |  |  |
| Finnigan MAT 95                                                                                                                                                                                                                                                                 |          | Source Temp:                                                                                                                                                                                                                                                                                    |    | $[M+Na]^+$<br><br>373.1028 |             |     |    |    |       |     |                             |  |  |      |  |                               |  |  |      |   |  |  |  |
| Bruker Reflex III                                                                                                                                                                                                                                                               |          | Acc. Voltage:                                                                                                                                                                                                                                                                                   |    |                            |             |     |    |    |       |     |                             |  |  |      |  |                               |  |  |      |   |  |  |  |
| Bruker BioTOF II                                                                                                                                                                                                                                                                |          | Resolution:                                                                                                                                                                                                                                                                                     |    |                            |             |     |    |    |       |     |                             |  |  |      |  |                               |  |  |      |   |  |  |  |
| Waters Triple Quad                                                                                                                                                                                                                                                              |          | Scan Range:                                                                                                                                                                                                                                                                                     |    |                            |             |     |    |    |       |     |                             |  |  |      |  |                               |  |  |      |   |  |  |  |
| Waters Synapt G2                                                                                                                                                                                                                                                                |          | Gas Used:                                                                                                                                                                                                                                                                                       |    |                            |             |     |    |    |       |     |                             |  |  |      |  |                               |  |  |      |   |  |  |  |
| Log #:                                                                                                                                                                                                                                                                          | Analyst: | Analysis Date:                                                                                                                                                                                                                                                                                  |    | Analyses Run:              | Total Cost: |     |    |    |       |     |                             |  |  |      |  |                               |  |  |      |   |  |  |  |

97814

HTG3-196

chresi

Kyle Kalstabakken

5/2/2012 2:59:31 PM

# Display Report

## Analysis Info

Analysis Name Z:\mslab\97814\1low\_res  
Method positive\_40212.tofpar  
Sample Name 97814  
Comment

Acquisition Date 5/2/2012 3:56:09 PM

Operator operator name  
Instrument BioTOF II

## Acquisition Parameter

|      |         |     |     |         |        |
|------|---------|-----|-----|---------|--------|
| n/a  | n/a     | n/a | n/a | detbias | 1750 V |
| EndP | -4000 V | n/a | n/a | n/a     | n/a    |

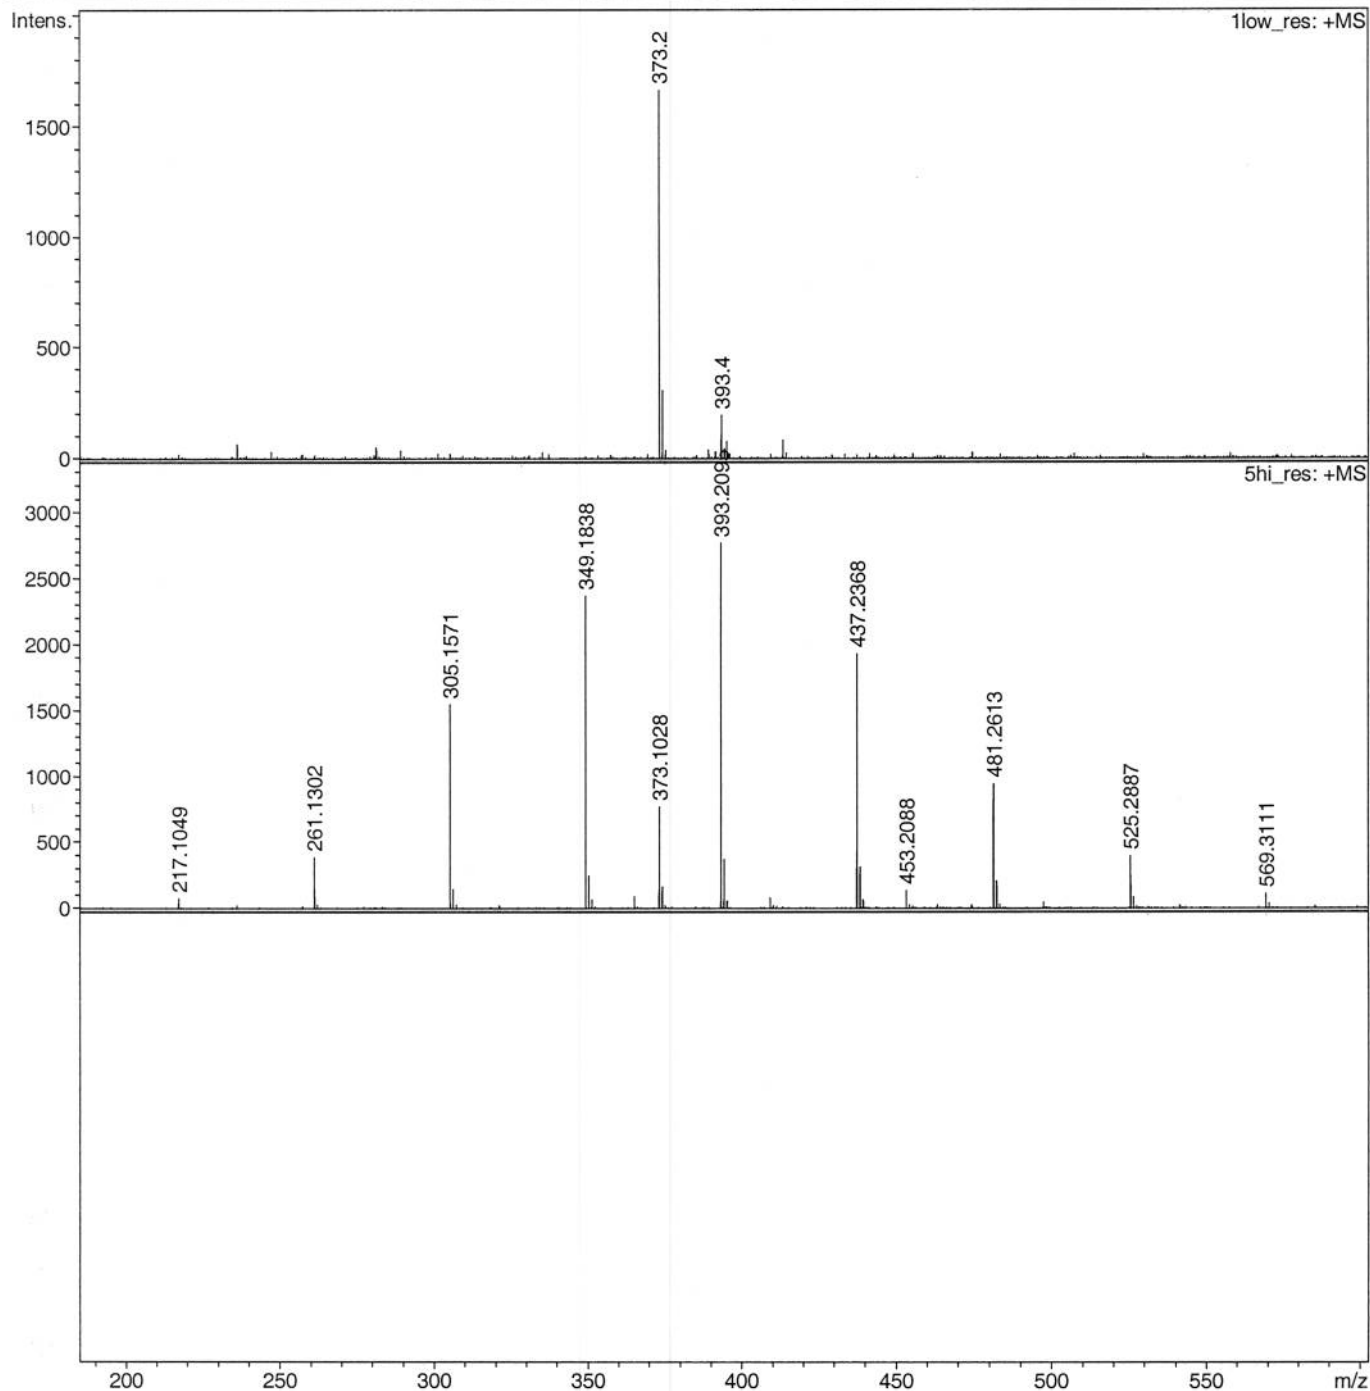

**U of M****University of Minnesota Department of Chemistry****Mass Spectrometry Service Laboratory**

email: mslab@chem.umn.edu

**Submit Sample To:** Mass Spectrometry Facility  
207 Pleasant St. SE  
Minneapolis, MN 55455  
Phone: (612)-625-8099  
FAX: (612)-626-7541

|                                                                                   |                   |                                                                                  |                |                                            |             |   |
|-----------------------------------------------------------------------------------|-------------------|----------------------------------------------------------------------------------|----------------|--------------------------------------------|-------------|---|
| Name: Giang Hoang                                                                 |                   | Phone: 612-625-3628                                                              |                |                                            |             |   |
| Email: hoang070@umn.edu                                                           | Send Results? Yes | FAX:                                                                             | FAX Results? N |                                            |             |   |
| P.I./Advisor: Chris Douglas                                                       |                   | U of M Budget # <del>519-1005</del> 519-1015                                     |                |                                            |             |   |
| Company/University: Department of Chemistry<br>University of Minnesota            |                   | P.O.# (For non-U of M Clients)                                                   |                |                                            |             |   |
| Shipping Address:                                                                 |                   | Billing Address:                                                                 |                |                                            |             |   |
| Sample Label: HTG3-195-P                                                          |                   | Molecular Weight: 364.1286                                                       |                |                                            |             |   |
| 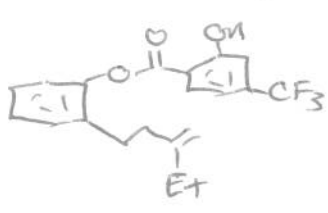 |                   | Molecular Formula: C <sub>20</sub> H <sub>19</sub> F <sub>3</sub> O <sub>2</sub> |                |                                            |             |   |
|                                                                                   |                   | Melting/Boiling Point: NA                                                        |                |                                            |             |   |
|                                                                                   |                   | Solubility: Methanol, CH <sub>2</sub> Cl <sub>2</sub>                            |                |                                            |             |   |
|                                                                                   |                   | Thermal Stability: Yes                                                           |                |                                            |             |   |
|                                                                                   |                   | Toxicity: NA                                                                     |                |                                            |             |   |
| Reactivity: Stable                                                                |                   |                                                                                  |                |                                            |             |   |
| <b>GC Conditions:</b>                                                             |                   | <b>Analysis Requested</b>                                                        |                |                                            |             |   |
|                                                                                   |                   | EI                                                                               | CI             | MALDI                                      | ESI         |   |
|                                                                                   |                   | Low Resolution<br>Nominal Mass                                                   |                |                                            |             |   |
|                                                                                   |                   | High Resolution<br>Accurate Mass                                                 |                |                                            |             | ✓ |
| <b>Special Sample Considerations:</b>                                             |                   | +Ve                                                                              |                |                                            |             |   |
|                                                                                   |                   | -Ve                                                                              |                |                                            |             |   |
|                                                                                   |                   | GCMS                                                                             |                |                                            |             |   |
|                                                                                   |                   | LCMS                                                                             |                |                                            |             |   |
| <b>Instrument Used</b>                                                            |                   | <b>Conditions Used</b>                                                           |                | <b>Operator Comments</b>                   |             |   |
| VG 70SE                                                                           |                   | Source Temp:                                                                     |                | ESI neg [M-H] <sup>-</sup><br><br>363.1218 |             |   |
| Finnigan MAT 95                                                                   |                   | Acc. Voltage:                                                                    |                |                                            |             |   |
| Extrel FTMS 2001                                                                  |                   | Resolution:                                                                      |                |                                            |             |   |
| Bruker Reflex III                                                                 |                   | Scan Range:                                                                      |                |                                            |             |   |
| Bruker BioTOF II                                                                  |                   | Gas Used:                                                                        |                |                                            |             |   |
| Log #:                                                                            | Analyst:          | Analysis Date:                                                                   |                | Analyses Run:                              | Total Cost: |   |

97903

HTG3-195P

chresi

Kyle Kalstabakken

5/15/2012 10:30:09 AM

# Display Report

## Analysis Info

Analysis Name Z:\mslab\97903\4hi\_res  
Method negative\_40212.tofpar  
Sample Name 97903  
Comment

Acquisition Date 5/17/2012 2:23:54 PM

Operator operator name  
Instrument BioTOF II

## Acquisition Parameter

|      |        |     |     |         |        |
|------|--------|-----|-----|---------|--------|
| n/a  | n/a    | n/a | n/a | detbias | 1700 V |
| EndP | 3000 V | n/a | n/a | n/a     | n/a    |

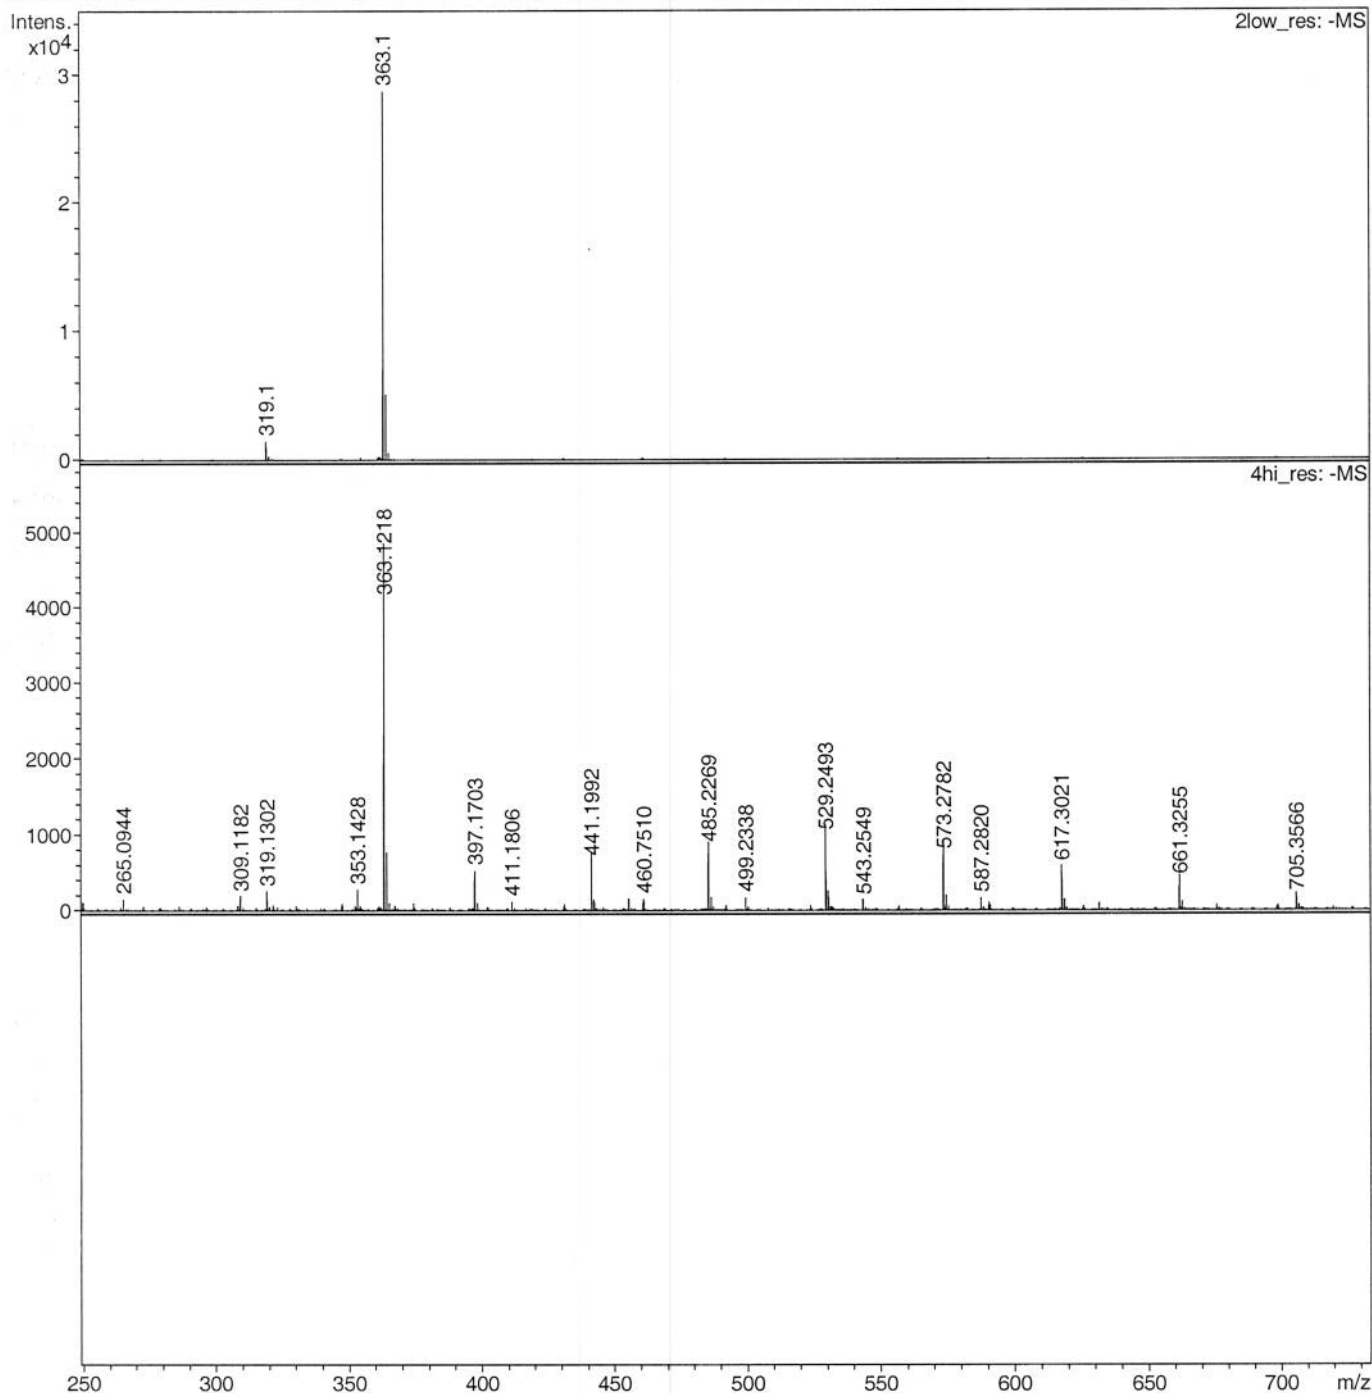

**U of M****University of Minnesota Department of Chemistry****Mass Spectrometry Service Laboratory**

email: mslab@chem.umn.edu

**Submit Sample To:** Mass Spectrometry Facility  
207 Pleasant St. SE  
Minneapolis, MN 55455  
Phone: (612)-625-8099  
FAX : (612)-626-7541

|                                                                                   |                   |                                                                                  |                |                                            |             |   |
|-----------------------------------------------------------------------------------|-------------------|----------------------------------------------------------------------------------|----------------|--------------------------------------------|-------------|---|
| Name: Giang Hoang                                                                 |                   | Phone: 612-625-3628                                                              |                |                                            |             |   |
| Email: hoang070@umn.edu                                                           | Send Results? Yes | FAX:                                                                             | FAX Results? N |                                            |             |   |
| P.I./Advisor: Chris Douglas                                                       |                   | U of M Budget # <del>519-1005</del> 519-1015                                     |                |                                            |             |   |
| Company/University: Department of Chemistry<br>University of Minnesota            |                   | P.O.# (For non-U of M Clients)                                                   |                |                                            |             |   |
| Shipping Address:                                                                 |                   | Billing Address:                                                                 |                |                                            |             |   |
| Sample Label: HTG3-197P                                                           |                   | Molecular Weight: 364.1286                                                       |                |                                            |             |   |
| 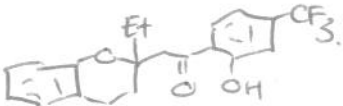 |                   | Molecular Formula: C <sub>20</sub> H <sub>19</sub> F <sub>3</sub> O <sub>3</sub> |                |                                            |             |   |
|                                                                                   |                   | Melting/Boiling Point: NA                                                        |                |                                            |             |   |
|                                                                                   |                   | Solubility: Methanol, CH <sub>2</sub> Cl <sub>2</sub>                            |                |                                            |             |   |
|                                                                                   |                   | Thermal Stability: Yes                                                           |                |                                            |             |   |
|                                                                                   |                   | Toxicity: NA                                                                     |                |                                            |             |   |
| Reactivity: Stable                                                                |                   |                                                                                  |                |                                            |             |   |
| <b>GC Conditions:</b>                                                             |                   | <b>Analysis Requested</b>                                                        |                |                                            |             |   |
|                                                                                   |                   | EI                                                                               | CI             | MALDI                                      | ESI         |   |
|                                                                                   |                   | Low Resolution<br>Nominal Mass                                                   |                |                                            |             |   |
|                                                                                   |                   | High Resolution<br>Accurate Mass                                                 |                |                                            |             | ✓ |
| <b>Special Sample Considerations:</b>                                             |                   | +Ve                                                                              |                |                                            |             |   |
|                                                                                   |                   | -Ve                                                                              |                |                                            |             |   |
|                                                                                   |                   | GCMS                                                                             |                |                                            |             |   |
|                                                                                   |                   | LCMS                                                                             |                |                                            |             |   |
| <b>Instrument Used</b>                                                            |                   | <b>Conditions Used</b>                                                           |                | <b>Operator Comments</b>                   |             |   |
| VG 70SE                                                                           |                   | Source Temp:                                                                     |                | ESI neg [M-H] <sup>-</sup><br><br>363.1216 |             |   |
| Finnigan MAT 95                                                                   |                   | Acc. Voltage:                                                                    |                |                                            |             |   |
| Extrel FTMS 2001                                                                  |                   | Resolution:                                                                      |                |                                            |             |   |
| Bruker Reflex III                                                                 |                   | Scan Range:                                                                      |                |                                            |             |   |
| Bruker BioTOF II                                                                  |                   | Gas Used:                                                                        |                |                                            |             |   |
| Log #:                                                                            | Analyst:          | Analysis Date:                                                                   |                | Analyses Run:                              | Total Cost: |   |

97904

HTG3-197P

chresi

Kyle Kalstabakken

5/15/2012 10:31:19 AM

# Display Report

## Analysis Info

Analysis Name Z:\mslab\97904\1low\_res  
Method negative\_40212.tofpar  
Sample Name 97904  
Comment

Acquisition Date 5/17/2012 2:54:06 PM

Operator operator name  
Instrument BioTOF II

## Acquisition Parameter

|      |        |     |     |         |        |
|------|--------|-----|-----|---------|--------|
| n/a  | n/a    | n/a | n/a | detbias | 1700 V |
| EndP | 3000 V | n/a | n/a | n/a     | n/a    |

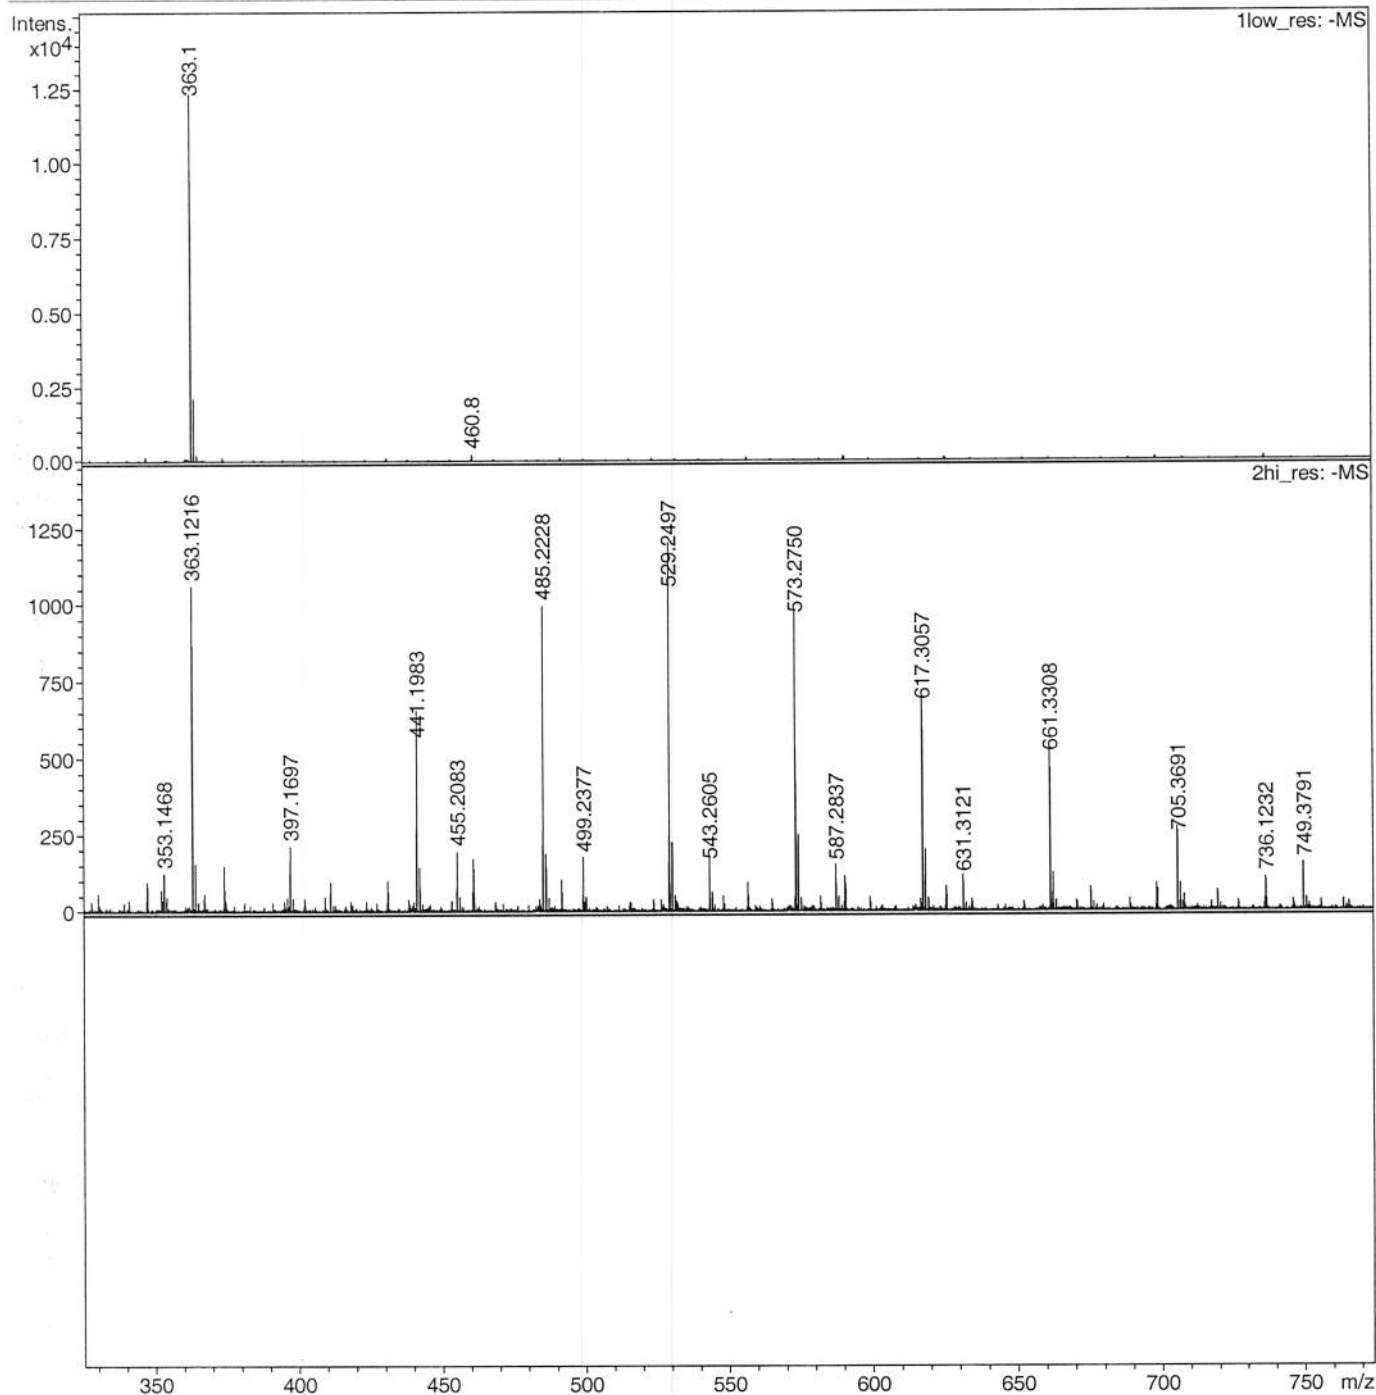

**U of M****University of Minnesota Department of Chemistry****Mass Spectrometry Service Laboratory**

email: mslab@chem.umn.edu

**Submit Sample To:** Mass Spectrometry Facility  
207 Pleasant St. SE  
Minneapolis, MN 55455  
Phone: (612)-625-8099  
FAX : (612)-626-7541

|                                                                                   |          |                                                                   |    |                                             |                |   |
|-----------------------------------------------------------------------------------|----------|-------------------------------------------------------------------|----|---------------------------------------------|----------------|---|
| Name: Giang Hoang                                                                 |          | Phone: 612-625-3628                                               |    |                                             |                |   |
| Email: hoang070@umn.edu                                                           |          | Send Results? Yes                                                 |    | FAX:                                        | FAX Results? N |   |
| P.I./Advisor: Chris Douglas                                                       |          | U of M Budget # <del>519-1005</del> 519-1015                      |    |                                             |                |   |
| Company/University: Department of Chemistry<br>University of Minnesota            |          | P.O.# (For non-U of M Clients)                                    |    |                                             |                |   |
| Shipping Address:                                                                 |          | Billing Address:                                                  |    |                                             |                |   |
| Sample Label: HTG3-154                                                            |          | Molecular Weight: 296.1412                                        |    |                                             |                |   |
| 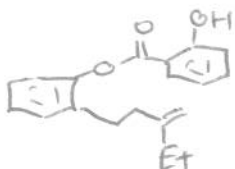 |          | Molecular Formula: C <sub>19</sub> H <sub>20</sub> O <sub>3</sub> |    |                                             |                |   |
|                                                                                   |          | Melting/Boiling Point: NA                                         |    |                                             |                |   |
|                                                                                   |          | Solubility: Methanol, CH <sub>2</sub> Cl <sub>2</sub>             |    |                                             |                |   |
|                                                                                   |          | Thermal Stability: Yes                                            |    |                                             |                |   |
|                                                                                   |          | Toxicity: NA                                                      |    |                                             |                |   |
|                                                                                   |          | Reactivity: Stable                                                |    |                                             |                |   |
| <b>GC Conditions:</b>                                                             |          | <b>Analysis Requested</b>                                         |    |                                             |                |   |
|                                                                                   |          | EI                                                                | CI | MALDI                                       | ESI            |   |
|                                                                                   |          | Low Resolution<br>Nominal Mass                                    |    |                                             |                |   |
|                                                                                   |          | High Resolution<br>Accurate Mass                                  |    |                                             |                | ✓ |
| <b>Special Sample Considerations:</b>                                             |          | +Ve                                                               |    |                                             |                |   |
|                                                                                   |          | -Ve                                                               |    |                                             |                |   |
|                                                                                   |          | GCMS                                                              |    |                                             |                |   |
|                                                                                   |          | LCMS                                                              |    |                                             |                |   |
| <b>Instrument Used</b>                                                            |          | <b>Conditions Used</b>                                            |    | <b>Operator Comments</b>                    |                |   |
| VG 70SE                                                                           |          | Source Temp:                                                      |    | ESI pos [M+Na] <sup>+</sup><br><br>319.1306 |                |   |
| Finnigan MAT 95                                                                   |          | Acc. Voltage:                                                     |    |                                             |                |   |
| Extrel FTMS 2001                                                                  |          | Resolution:                                                       |    |                                             |                |   |
| Bruker Reflex III                                                                 |          | Scan Range:                                                       |    |                                             |                |   |
| Bruker BioTOF II                                                                  |          | Gas Used:                                                         |    |                                             |                |   |
| Log #:                                                                            | Analyst: | Analysis Date:                                                    |    | Analyses Run:                               | Total Cost:    |   |

97906

HTG3-154

chresi

Kyle Kalstabakken

5/15/2012 10:33:13 AM

# Display Report

## Analysis Info

Analysis Name Z:\mslab\97906\8hi\_res  
Method positive\_40212.tofpar  
Sample Name 97906  
Comment

Acquisition Date 5/17/2012 3:30:25 PM

Operator operator name  
Instrument BioTOF II

## Acquisition Parameter

|      |         |     |     |         |        |
|------|---------|-----|-----|---------|--------|
| n/a  | n/a     | n/a | n/a | detbias | 1750 V |
| EndP | -4000 V | n/a | n/a | n/a     | n/a    |

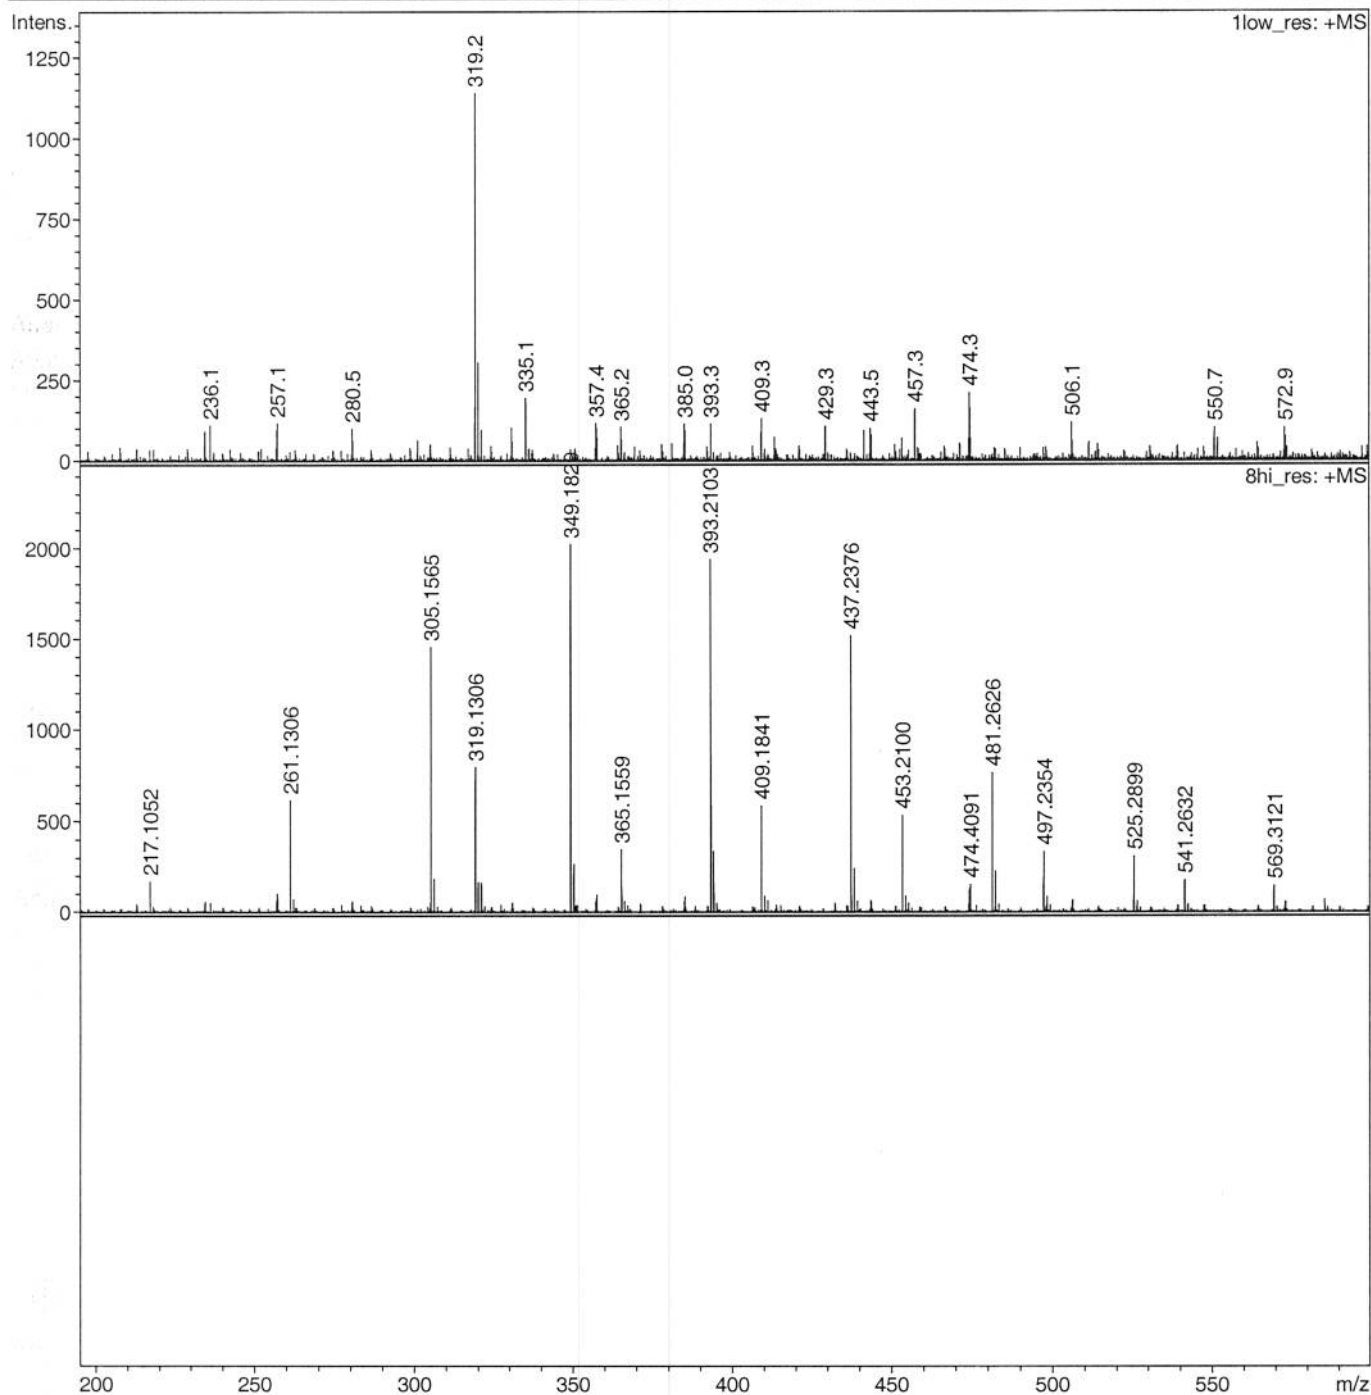

**U of M****University of Minnesota Department of Chemistry****Mass Spectrometry Service Laboratory**

email: mslab@chem.umn.edu

**Submit Sample To:** Mass Spectrometry Facility  
207 Pleasant St. SE  
Minneapolis, MN 55455  
Phone: (612)-625-8099  
FAX: (612)-626-7541

|                                                                        |                   |                                                                   |                |                                             |             |
|------------------------------------------------------------------------|-------------------|-------------------------------------------------------------------|----------------|---------------------------------------------|-------------|
| Name: Giang Hoang                                                      |                   | Phone: 612-625-3628                                               |                |                                             |             |
| Email: hoang070@umn.edu                                                | Send Results? Yes | FAX:                                                              | FAX Results? N |                                             |             |
| P.I./Advisor: Chris Douglas                                            |                   | U of M Budget # <del>519-1005</del> 519-1015                      |                |                                             |             |
| Company/University: Department of Chemistry<br>University of Minnesota |                   | P.O.# (For non-U of M Clients)                                    |                |                                             |             |
| Shipping Address:                                                      |                   | Billing Address:                                                  |                |                                             |             |
| Sample Label: HTG 3-188P                                               |                   | Molecular Weight: 296.1412                                        |                |                                             |             |
|                                                                        |                   | Molecular Formula: C <sub>19</sub> H <sub>20</sub> O <sub>3</sub> |                |                                             |             |
|                                                                        |                   | Melting/Boiling Point: NA                                         |                |                                             |             |
|                                                                        |                   | Solubility: Methanol, CH <sub>2</sub> Cl <sub>2</sub>             |                |                                             |             |
|                                                                        |                   | Thermal Stability: Yes                                            |                |                                             |             |
|                                                                        |                   | Toxicity: NA                                                      |                |                                             |             |
| Reactivity: Stable                                                     |                   |                                                                   |                |                                             |             |
| <b>GC Conditions:</b>                                                  |                   | <b>Analysis Requested</b>                                         |                |                                             |             |
|                                                                        |                   | EI                                                                | CI             | MALDI                                       | ESI         |
| Low Resolution<br>Nominal Mass                                         |                   |                                                                   |                |                                             |             |
| High Resolution<br>Accurate Mass                                       |                   |                                                                   |                |                                             | ✓           |
| <b>Special Sample Considerations:</b>                                  |                   | +Ve                                                               |                |                                             |             |
|                                                                        |                   | -Ve                                                               |                |                                             |             |
|                                                                        |                   | GCMS                                                              |                |                                             |             |
|                                                                        |                   | LCMS                                                              |                |                                             |             |
| <b>Instrument Used</b>                                                 |                   | <b>Conditions Used</b>                                            |                | <b>Operator Comments</b>                    |             |
| VG 70SE                                                                |                   | Source Temp:                                                      |                | ESI pos [M+Na] <sup>+</sup><br><br>319.1308 |             |
| Finnigan MAT 95                                                        |                   | Acc. Voltage:                                                     |                |                                             |             |
| Extrel FTMS 2001                                                       |                   | Resolution:                                                       |                |                                             |             |
| Bruker Reflex III                                                      |                   | Scan Range:                                                       |                |                                             |             |
| Bruker BioTOF II                                                       |                   | Gas Used:                                                         |                |                                             |             |
| Log #:                                                                 | Analyst:          | Analysis Date:                                                    |                | Analyses Run:                               | Total Cost: |

97905

HTG3-188P

chresi

Kyle Kalstabakken

5/15/2012 10:32:25 AM

# Display Report

## Analysis Info

Analysis Name Z:\mslab\97905\4hi\_res  
Method positive\_40212.tofpar  
Sample Name 97905  
Comment

Acquisition Date 5/17/2012 3:14:56 PM

Operator operator name  
Instrument BioTOF II

## Acquisition Parameter

|      |         |     |     |         |        |
|------|---------|-----|-----|---------|--------|
| n/a  | n/a     | n/a | n/a | detbias | 1750 V |
| EndP | -4000 V | n/a | n/a | n/a     | n/a    |

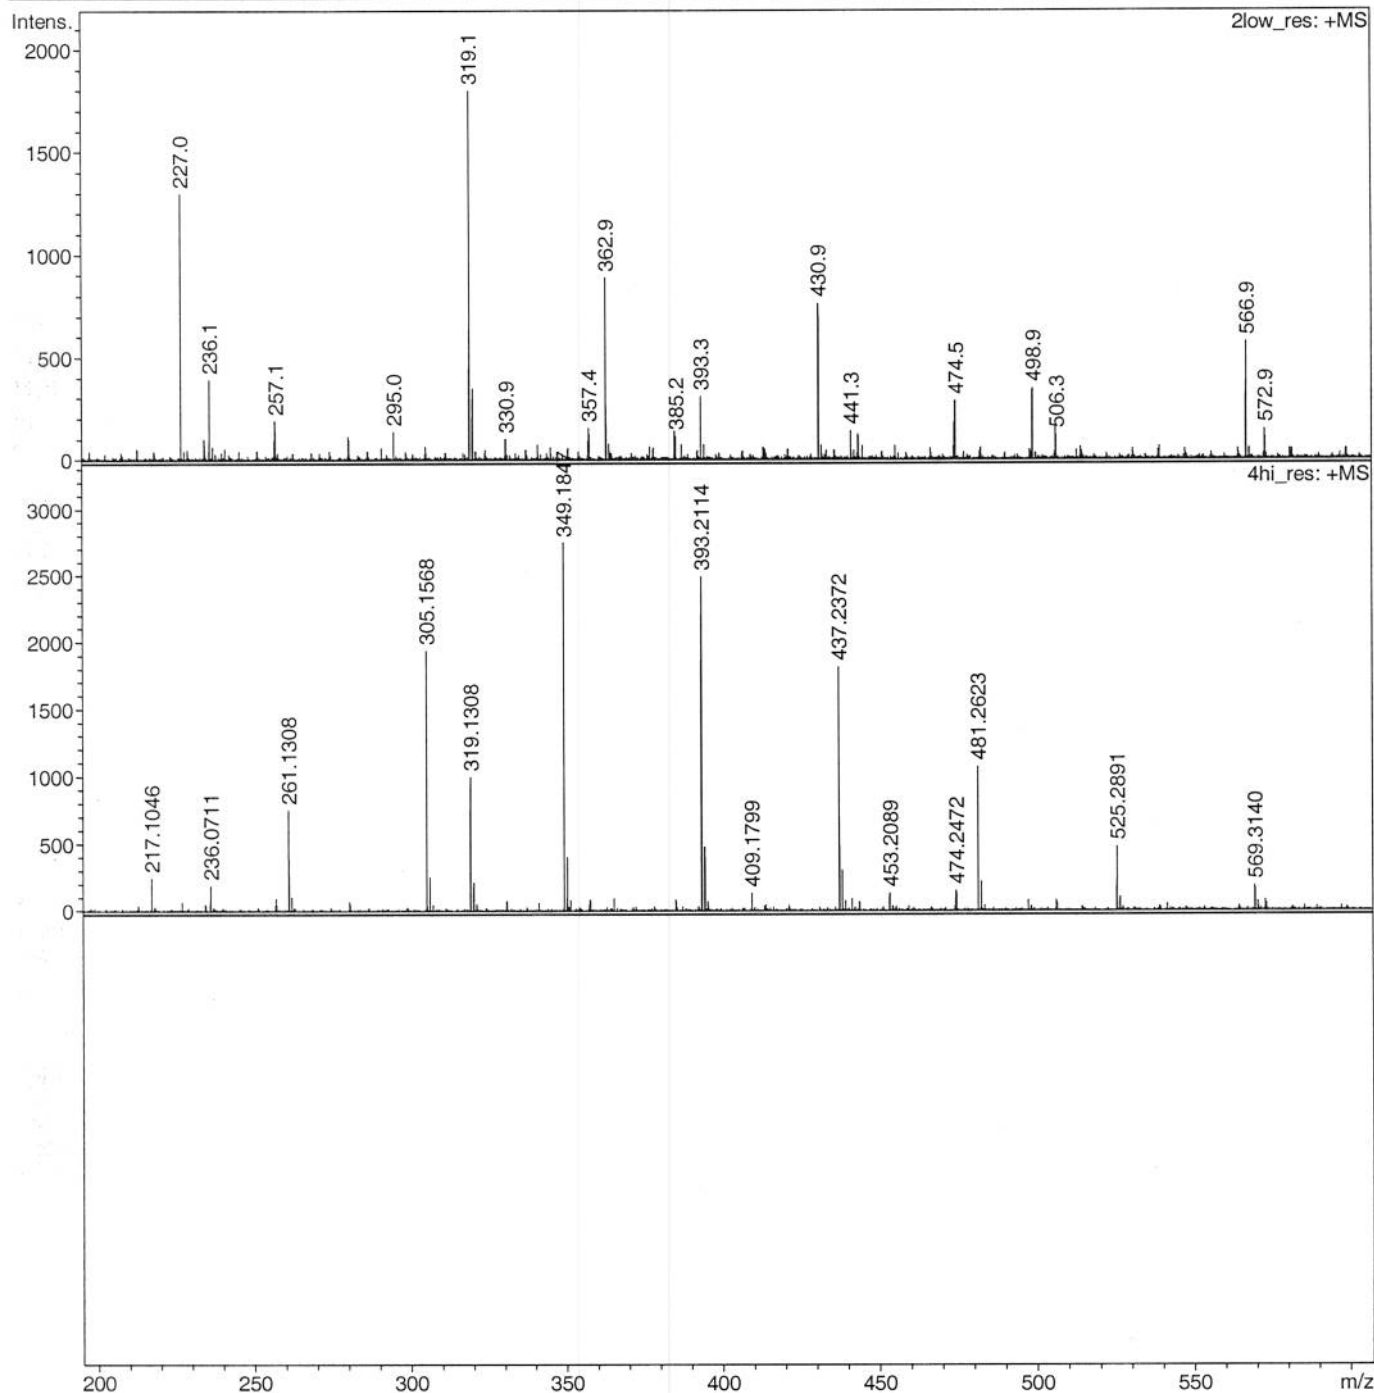

Supplement: Supplementary file 47 [file 3863956]
