# Supplementary material
Source: publisher figshare collection journal article supplement (https://acs.figshare.com/ndownloader/files/3863956)

# Display Report

## Analysis Info

Analysis Name Z:\zhopan\100328\1e\25highmass  
Method positive\_40212.tofpar  
Sample Name 1e  
Comment

Acquisition Date 2/11/2013 3:27:46 PM

Operator operator name  
Instrument BioTOF II

## Acquisition Parameter

|      |         |     |     |         |        |
|------|---------|-----|-----|---------|--------|
| n/a  | n/a     | n/a | n/a | detbias | 1850 V |
| EndP | -4000 V | n/a | n/a | n/a     | n/a    |

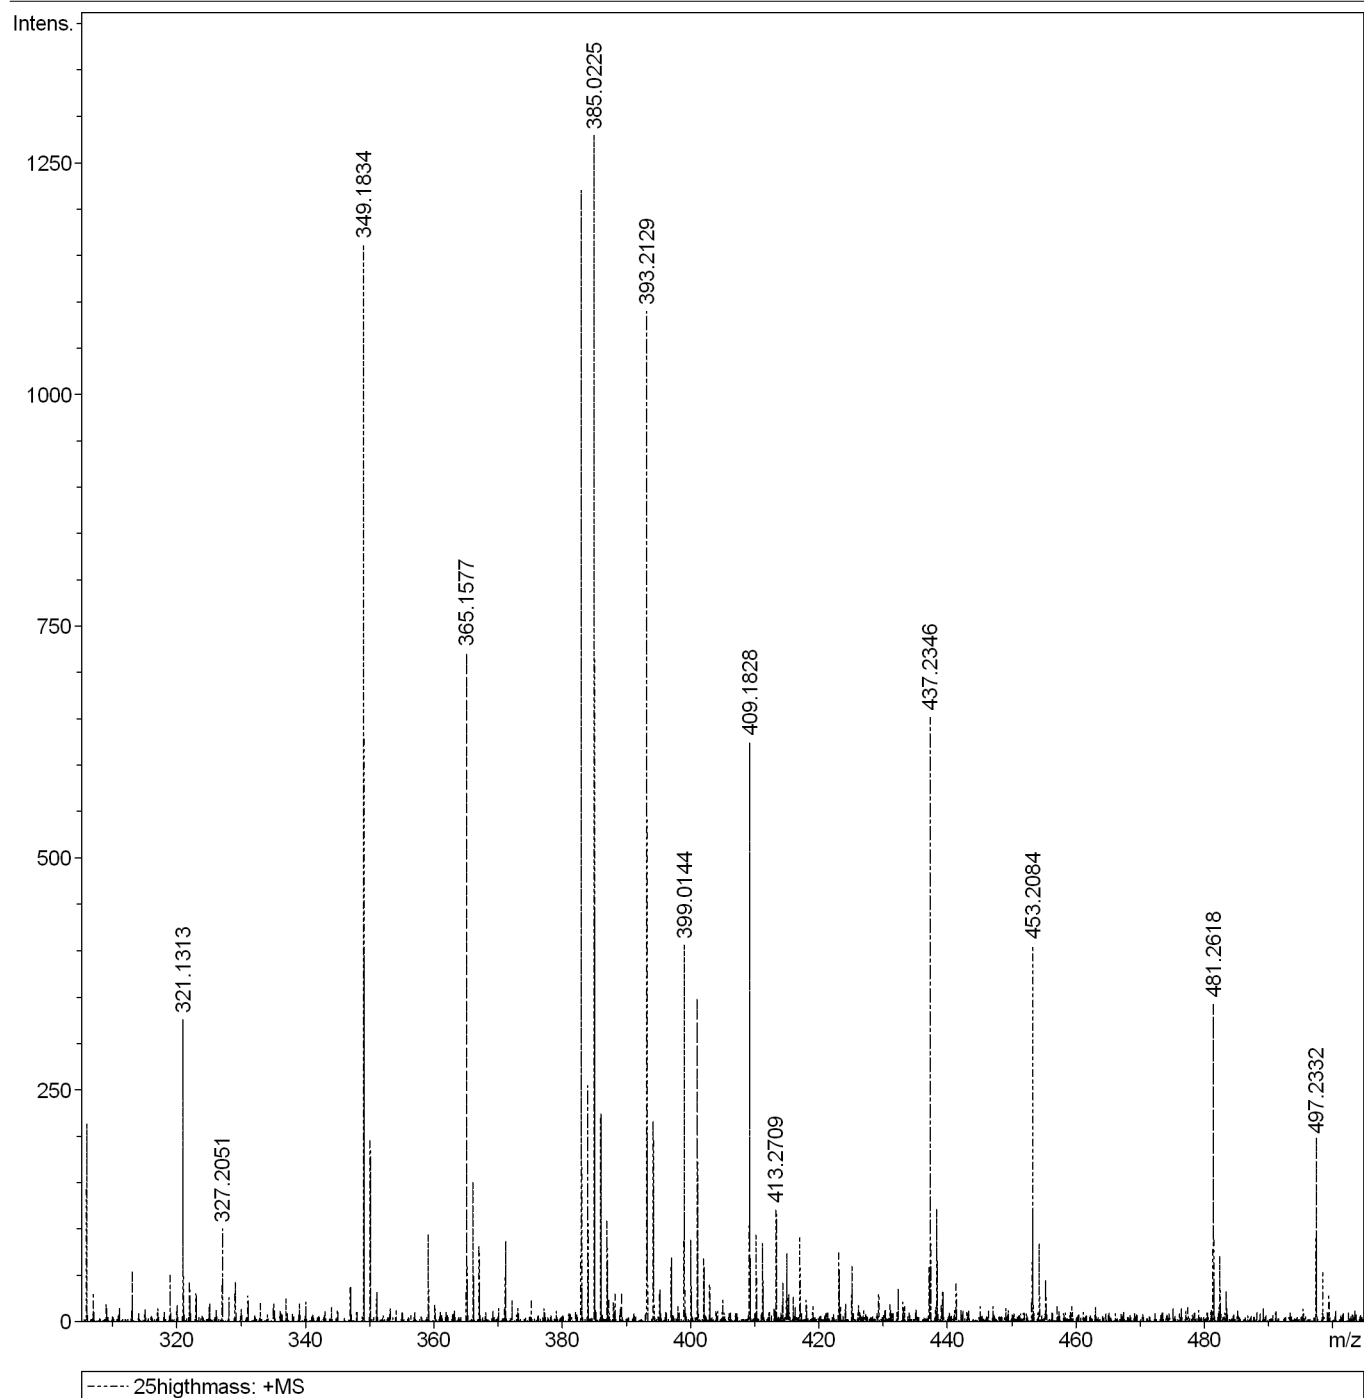

Supplement: Supplementary file 3 [file 3863956]
