# Supplementary material
Source: publisher figshare collection journal article supplement (https://acs.figshare.com/ndownloader/files/3863956)

# Display Report

## Analysis Info

Analysis Name Z:\zhopan\103303\zp3-42-prepTLC-f3-LRMS\3HM with Na  
Method negative\_102813.tofpar  
Sample Name zp3-42-prepTLC-f3-LRMS  
Comment

Acquisition Date 11/4/2013 3:32:36 PM

Operator operator name  
Instrument BioTOF II

## Acquisition Parameter

|      |        |     |     |         |        |
|------|--------|-----|-----|---------|--------|
| n/a  | n/a    | n/a | n/a | detbias | 1800 V |
| EndP | 3000 V | n/a | n/a | n/a     | n/a    |

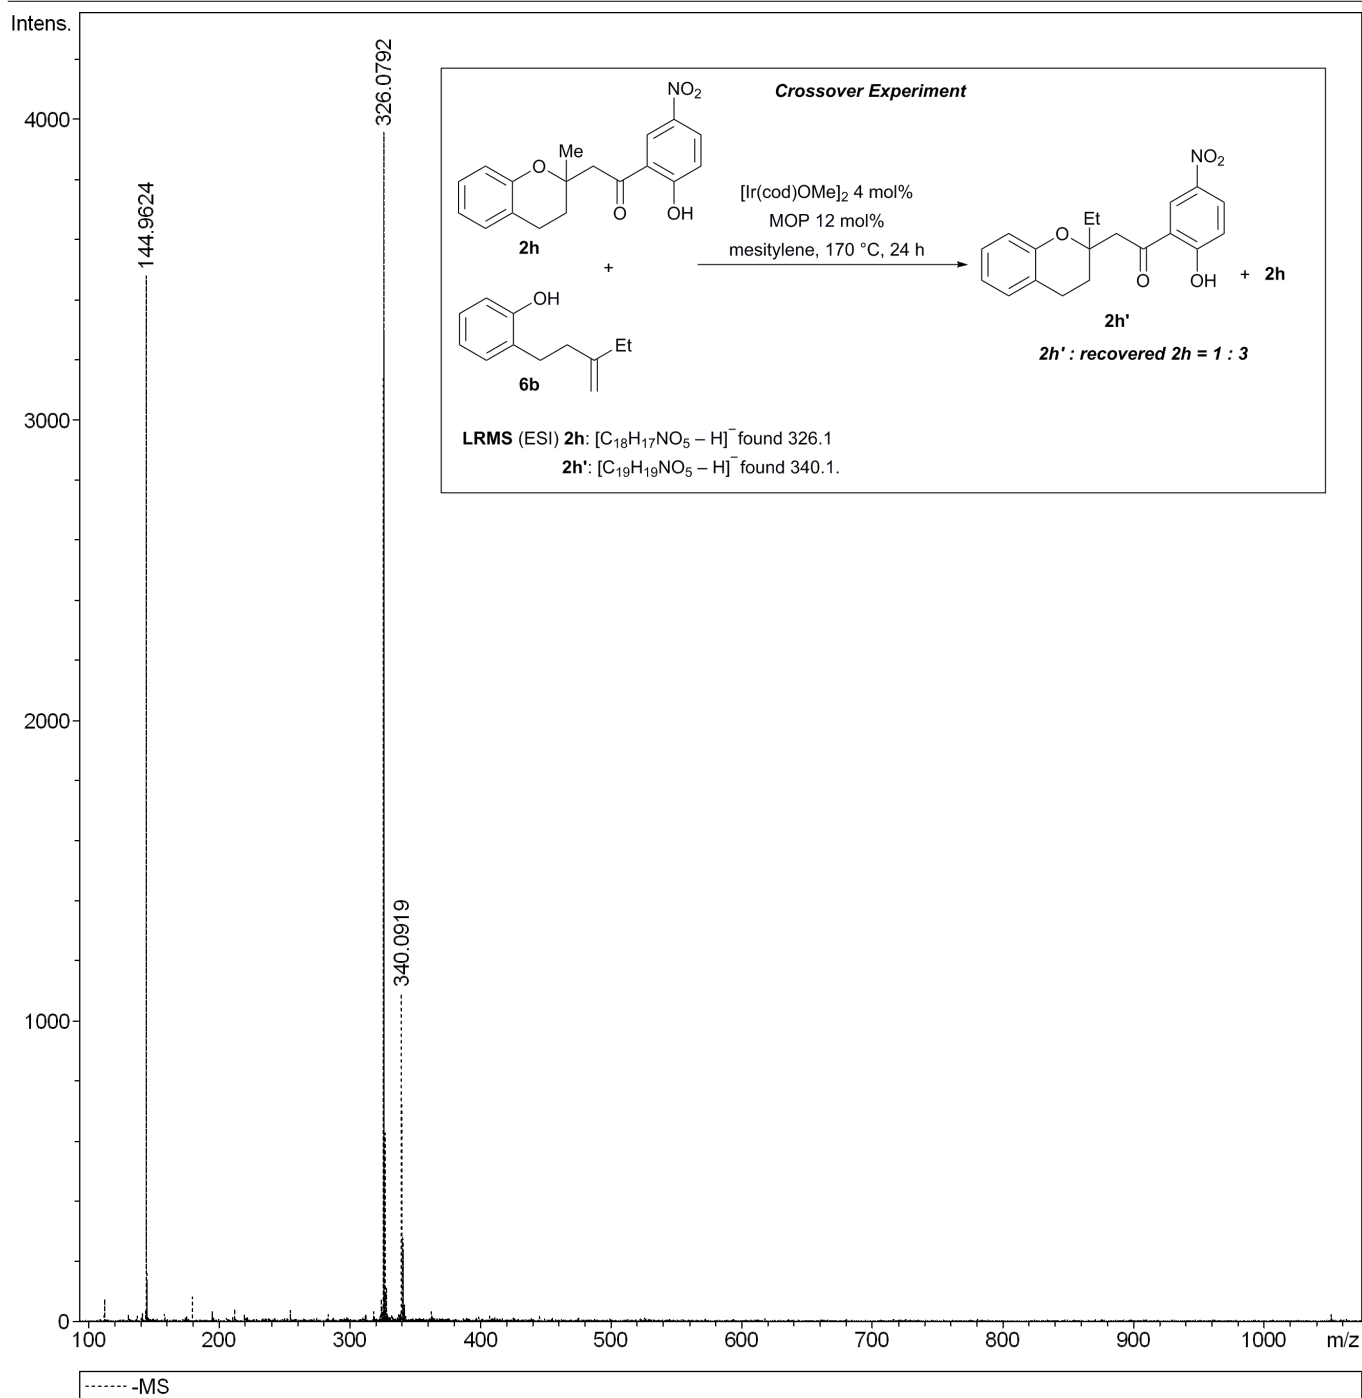

Supplement: Supplementary file 14 [file 3863956]
