# Supplementary material
Source: publisher figshare collection journal article supplement (https://acs.figshare.com/ndownloader/files/3863956)

# Display Report

## Analysis Info

Analysis Name Z:\zhopan\99745\2e-negative-nostd\12e-negative-nostd  
Method negative\_40212.tofpar  
Sample Name 2e-negative-nostd  
Comment

Acquisition Date 12/7/2012 12:00:52 PM

Operator operator name  
Instrument BioTOF II

## Acquisition Parameter

|      |        |     |     |         |        |
|------|--------|-----|-----|---------|--------|
| n/a  | n/a    | n/a | n/a | detbias | 1700 V |
| EndP | 3000 V | n/a | n/a | n/a     | n/a    |

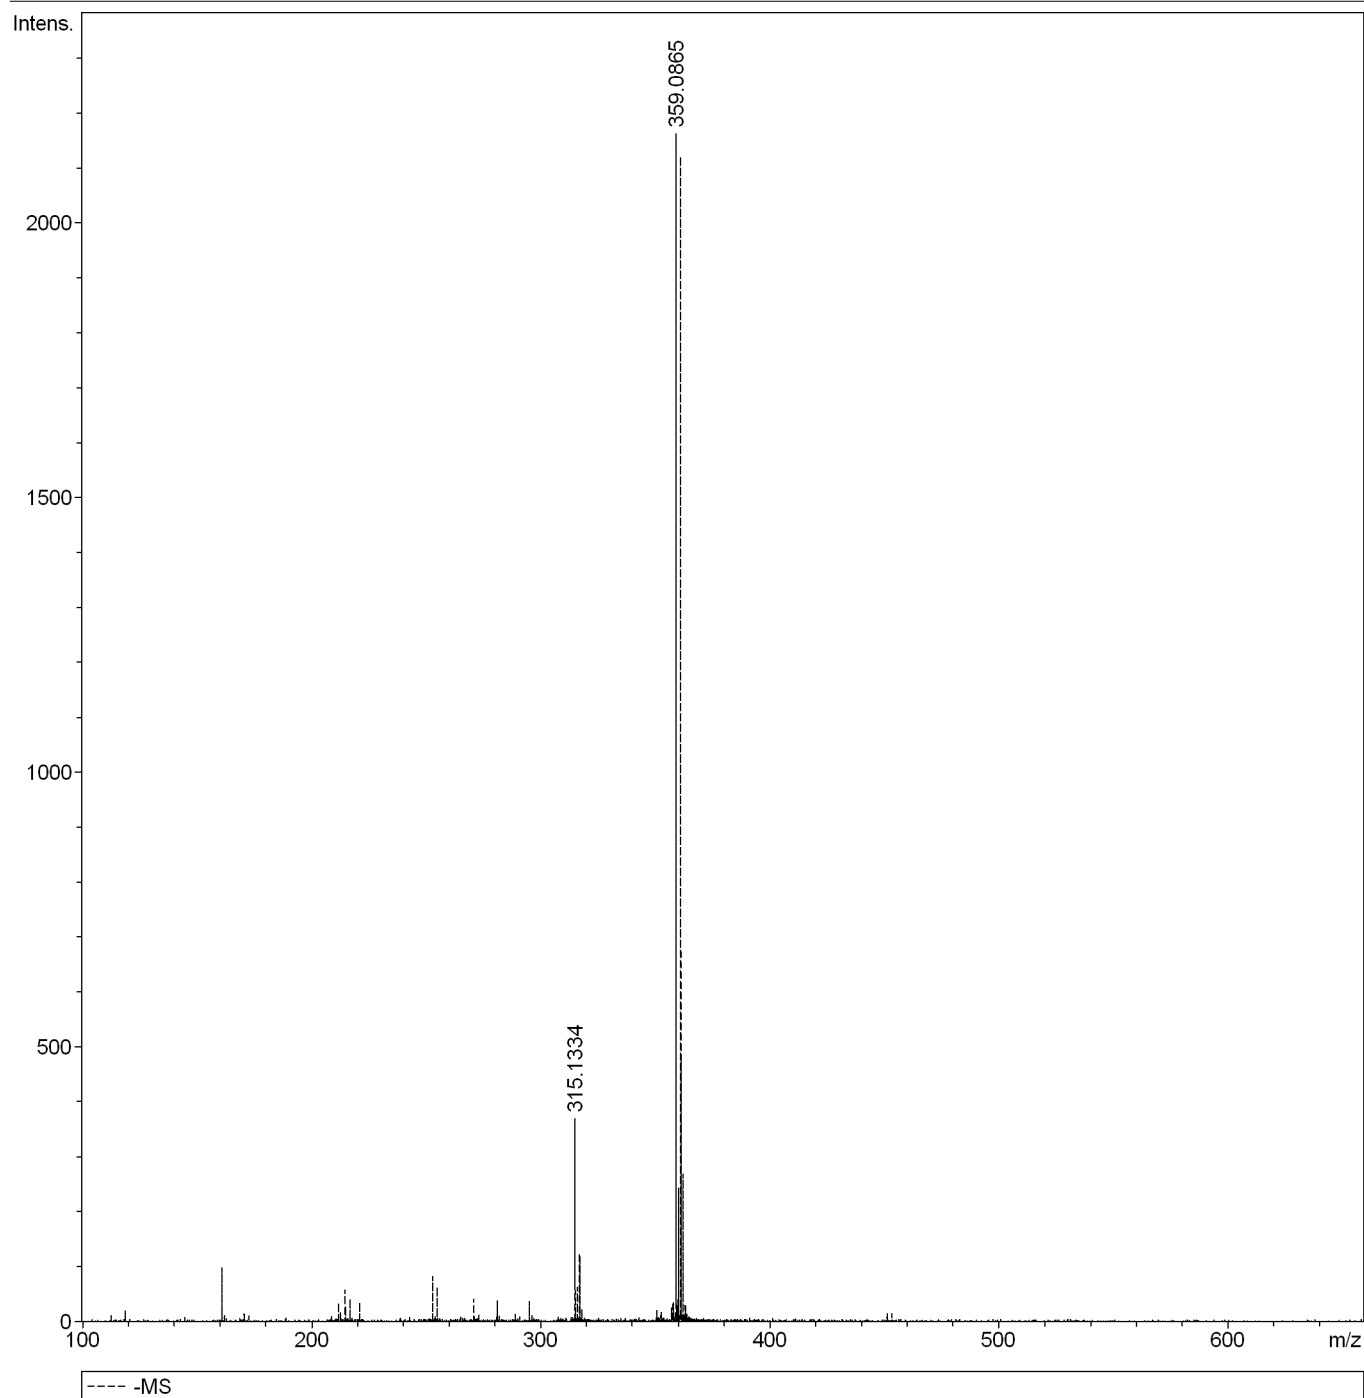

Supplement: Supplementary file 24 [file 3863956]
