# Supplementary material
Source: publisher figshare collection journal article supplement (https://acs.figshare.com/ndownloader/files/3863956)
Supplement: Supplementary file 32 [file 3863956]

# Display Report

## Analysis Info

Analysis Name Z:\zhopan\100296\2b\5MP-0228-finalwash.d  
Method positive\_40212.tofpar  
Sample Name 2b  
Comment

Acquisition Date 2/7/2013 2:40:41 PM

Operator operator name  
Instrument BioTOF II

## Acquisition Parameter

|      |         |     |     |         |        |
|------|---------|-----|-----|---------|--------|
| n/a  | n/a     | n/a | n/a | detbias | 1850 V |
| EndP | -4000 V | n/a | n/a | n/a     | n/a    |

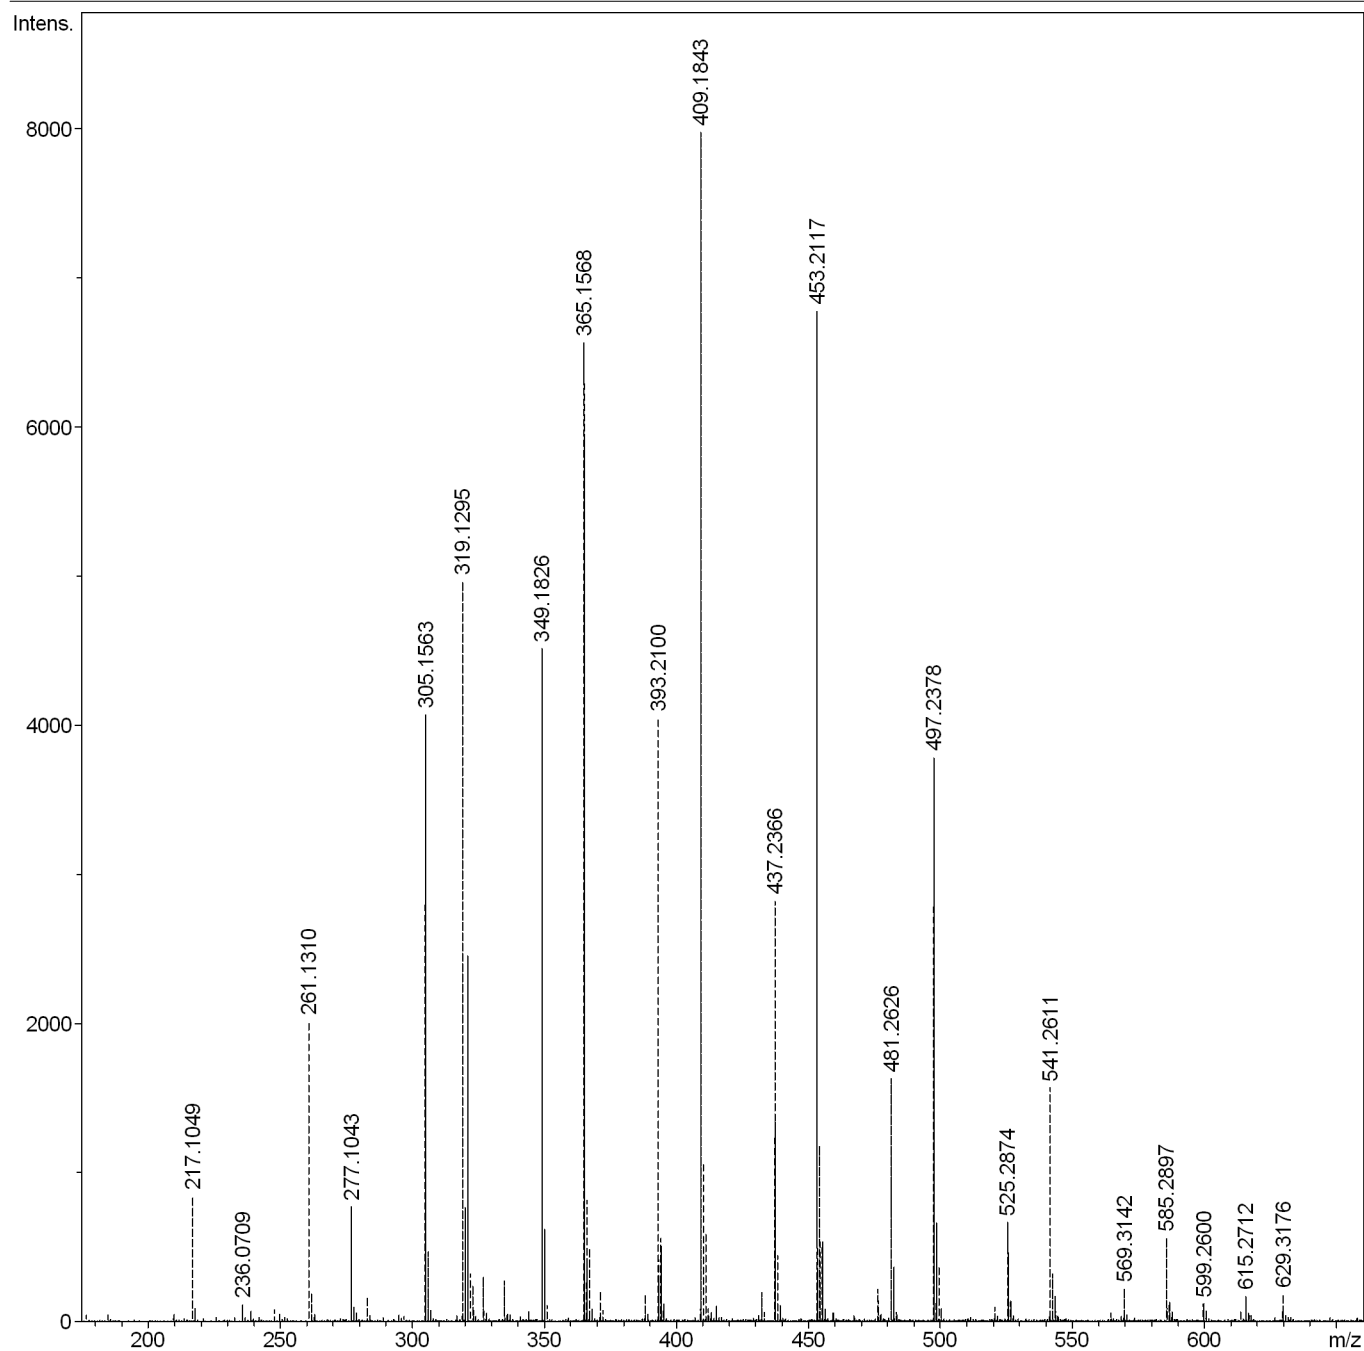

---- 5MP-0228-finalwash.d: +MS
