# Supplementary material
Source: publisher figshare collection journal article supplement (https://acs.figshare.com/ndownloader/files/3863956)
Supplement: Supplementary file 35 [file 3863956]

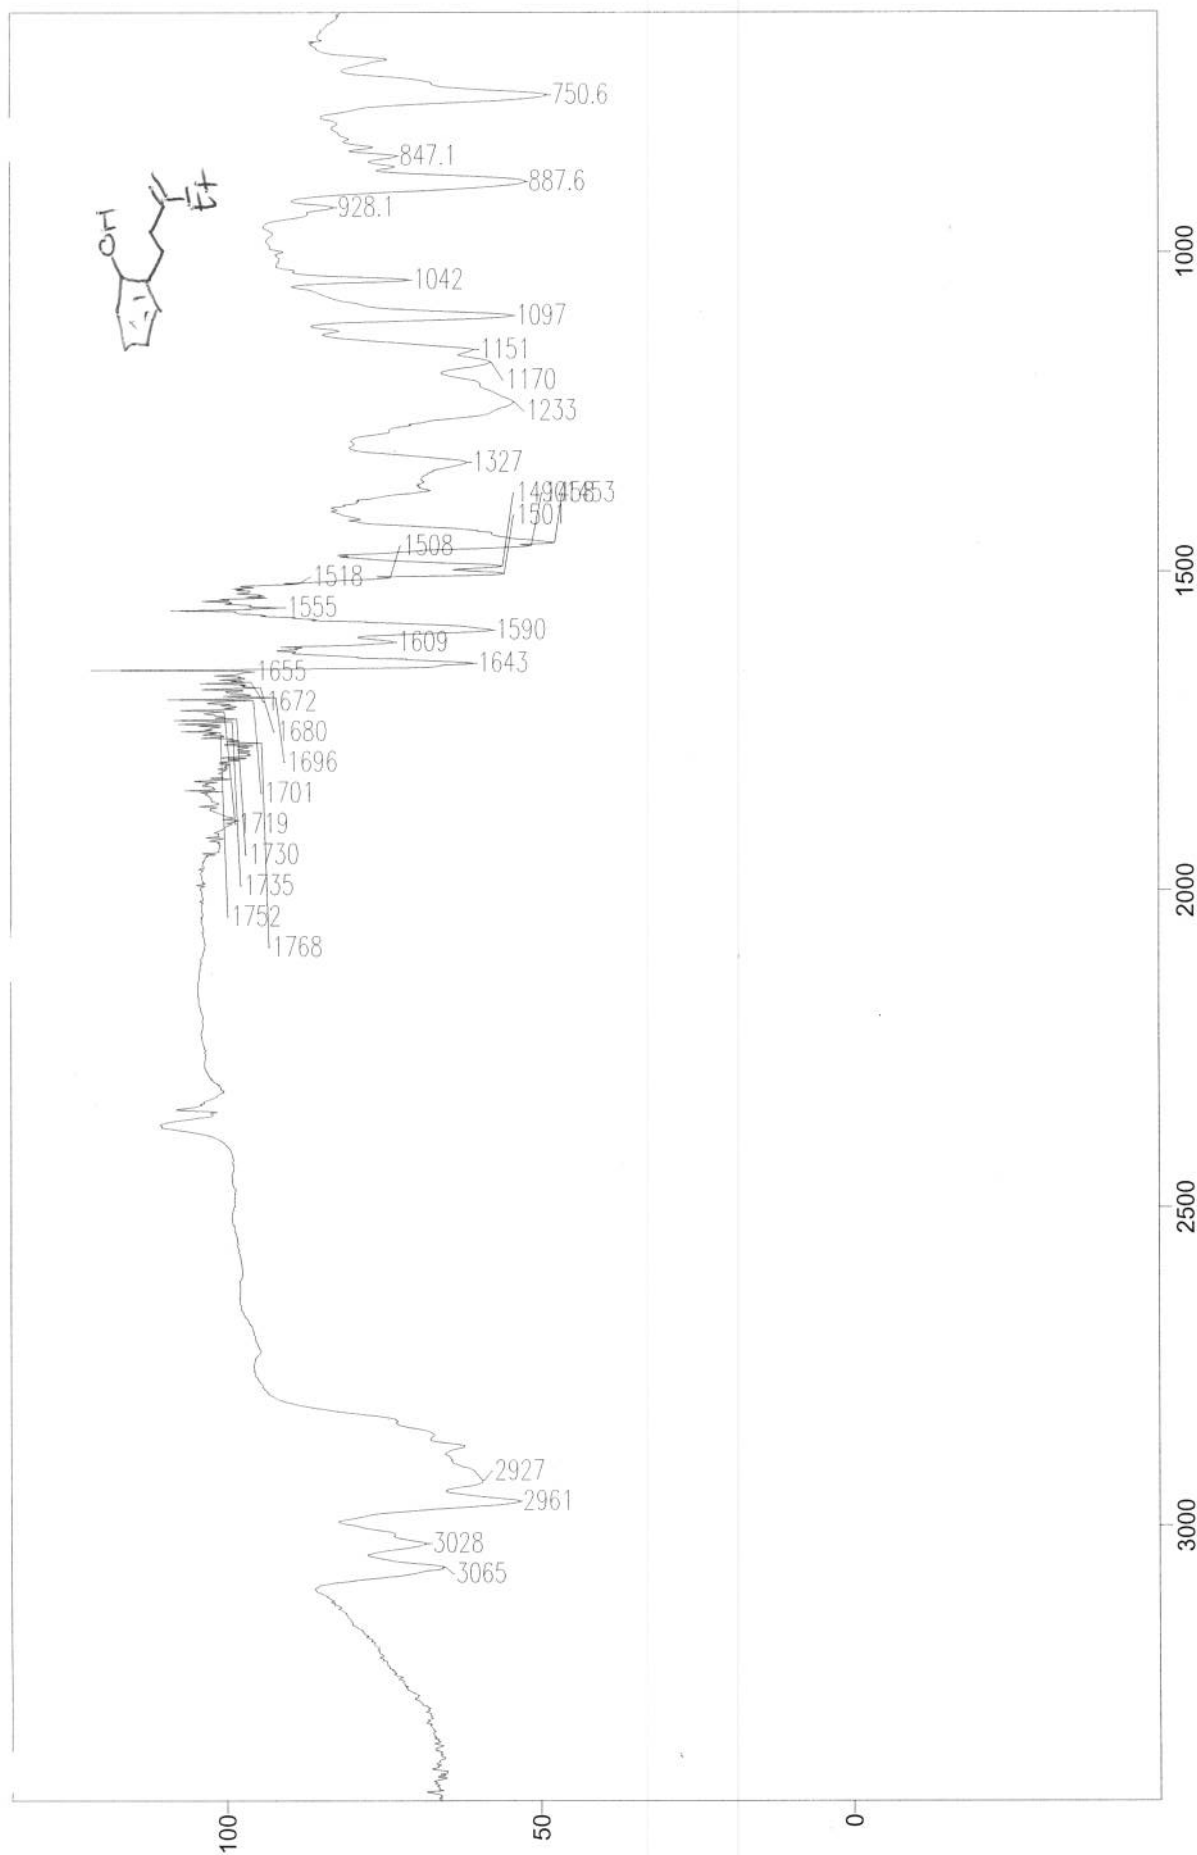

Transmission / Wavenumber (cm<sup>-1</sup>)

File # 1 = HTG172-PHENOL ET

starting material

Paged X-Zoom CURSOR

5/11/2012 2:34 PM Res=2 cm-1

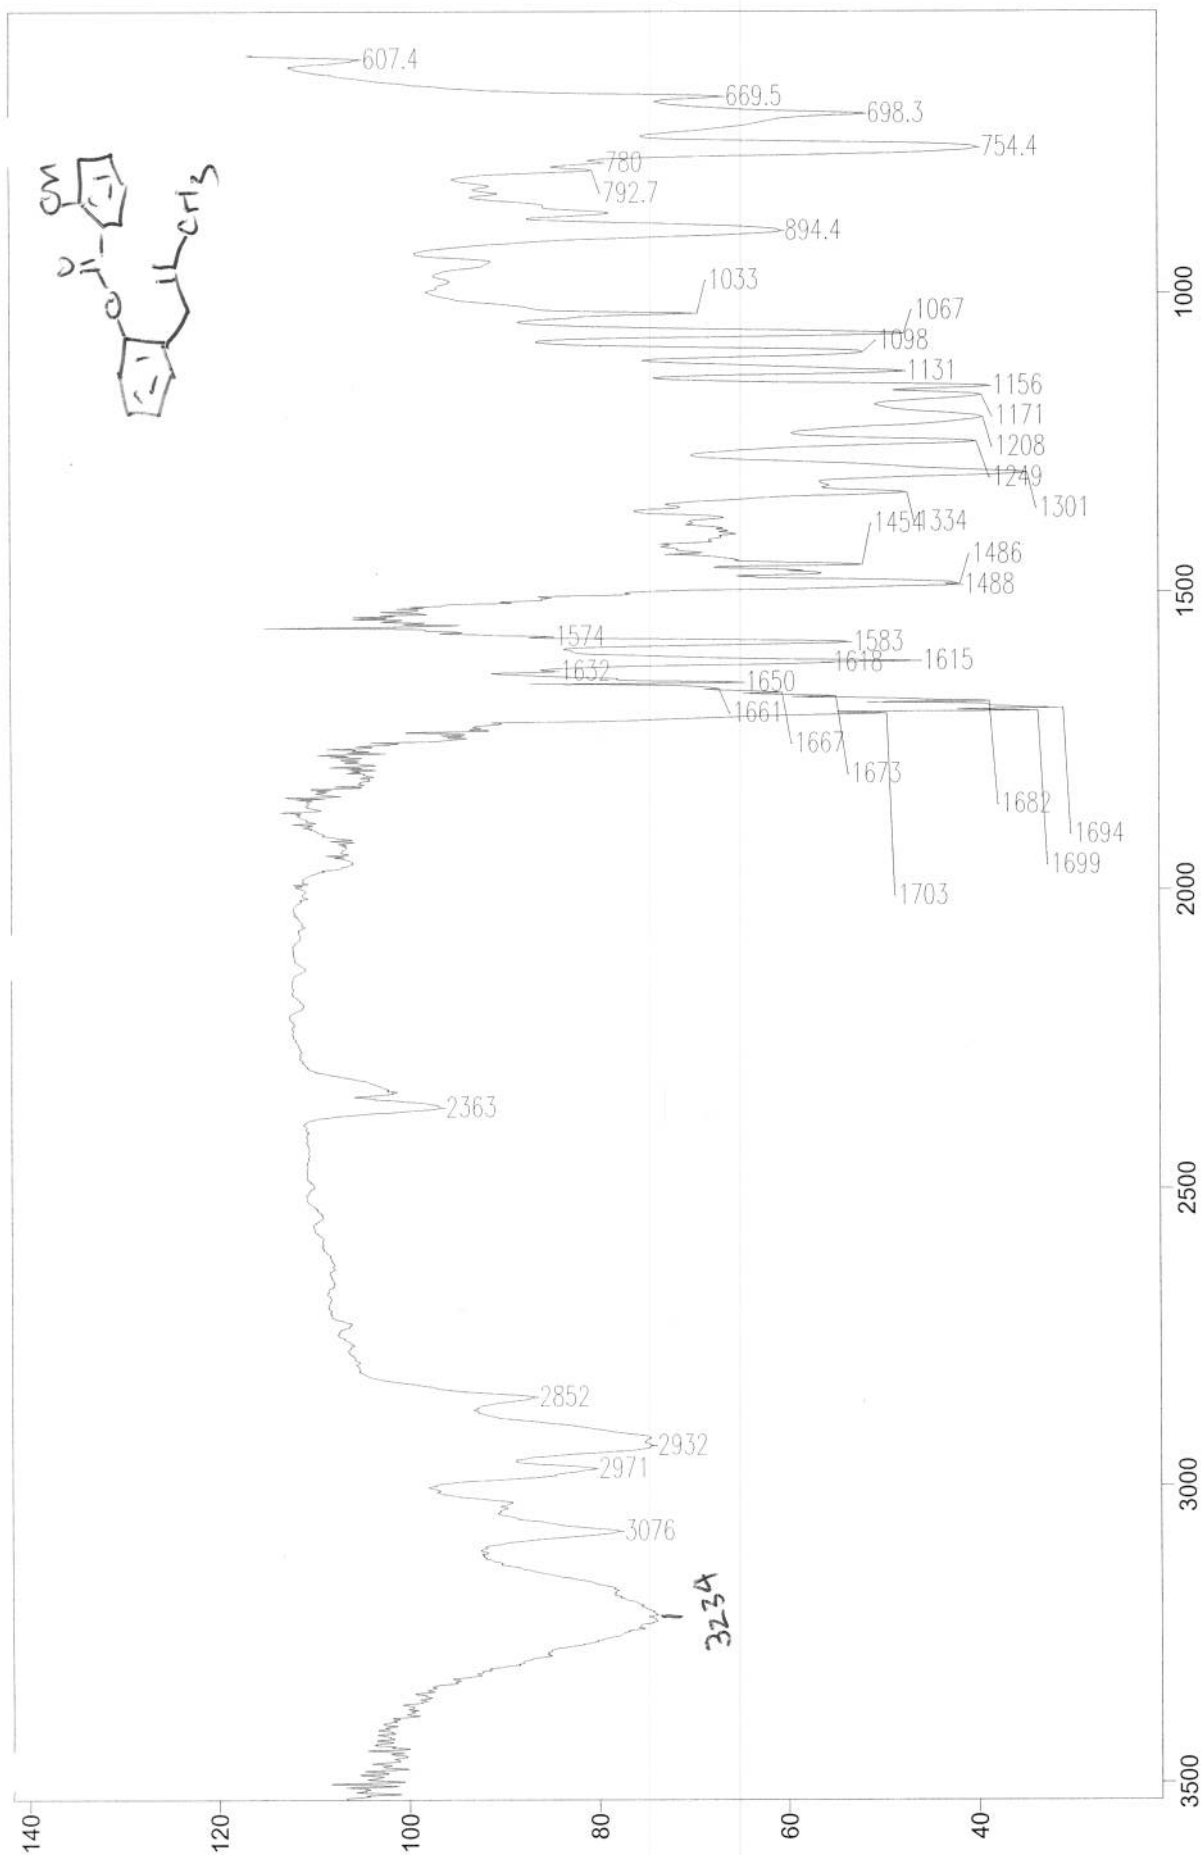

Transmission / Wavenumber (cm-1)

File # 1 = HTG3-44-P

Paged X-Zoom CURSOR

5/11/2012 3:34 PM Res=2 cm-1

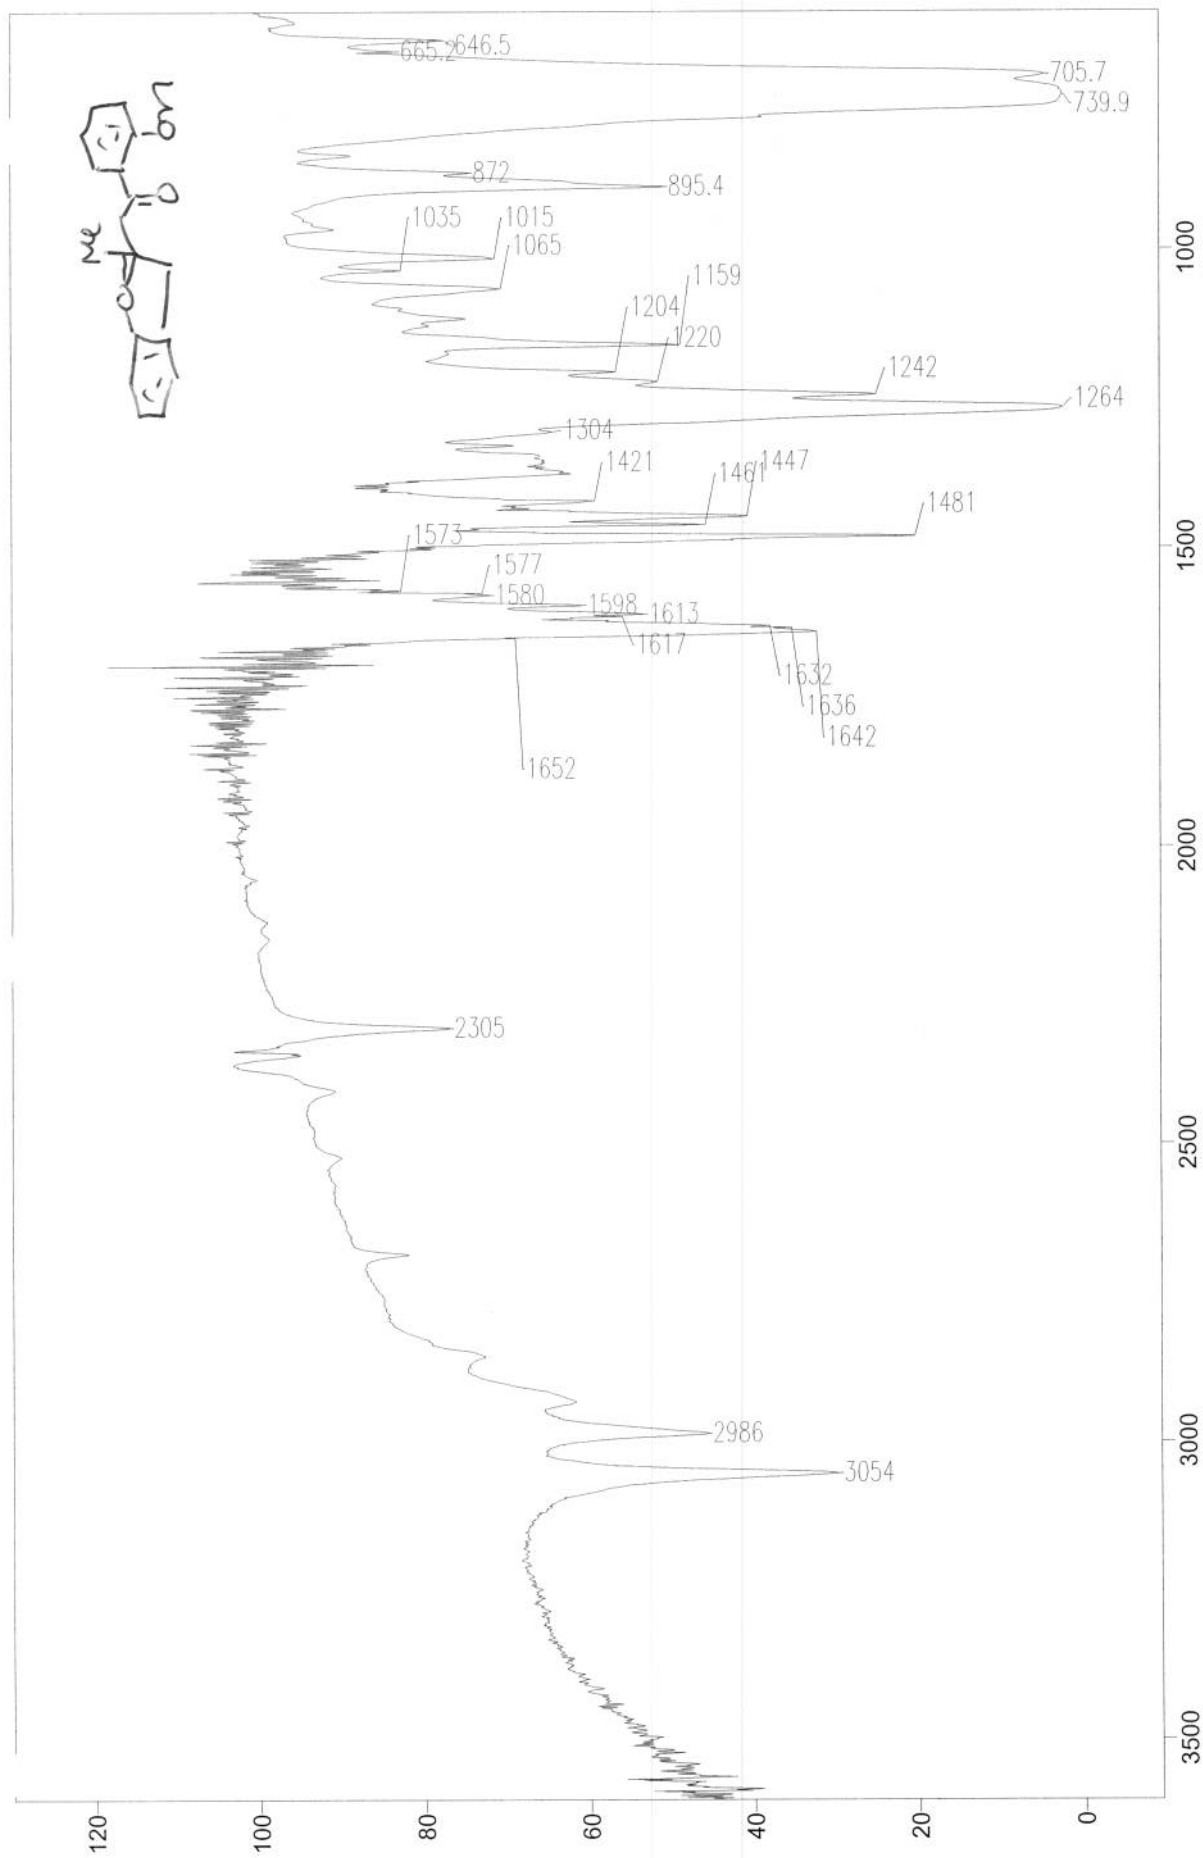

Transmission / Wavenumber (cm<sup>-1</sup>)

File # 1 = HTG3-61-P2

Paged X-Zoom CURSOR

5/11/2012 3:41 PM Res=2 cm-1

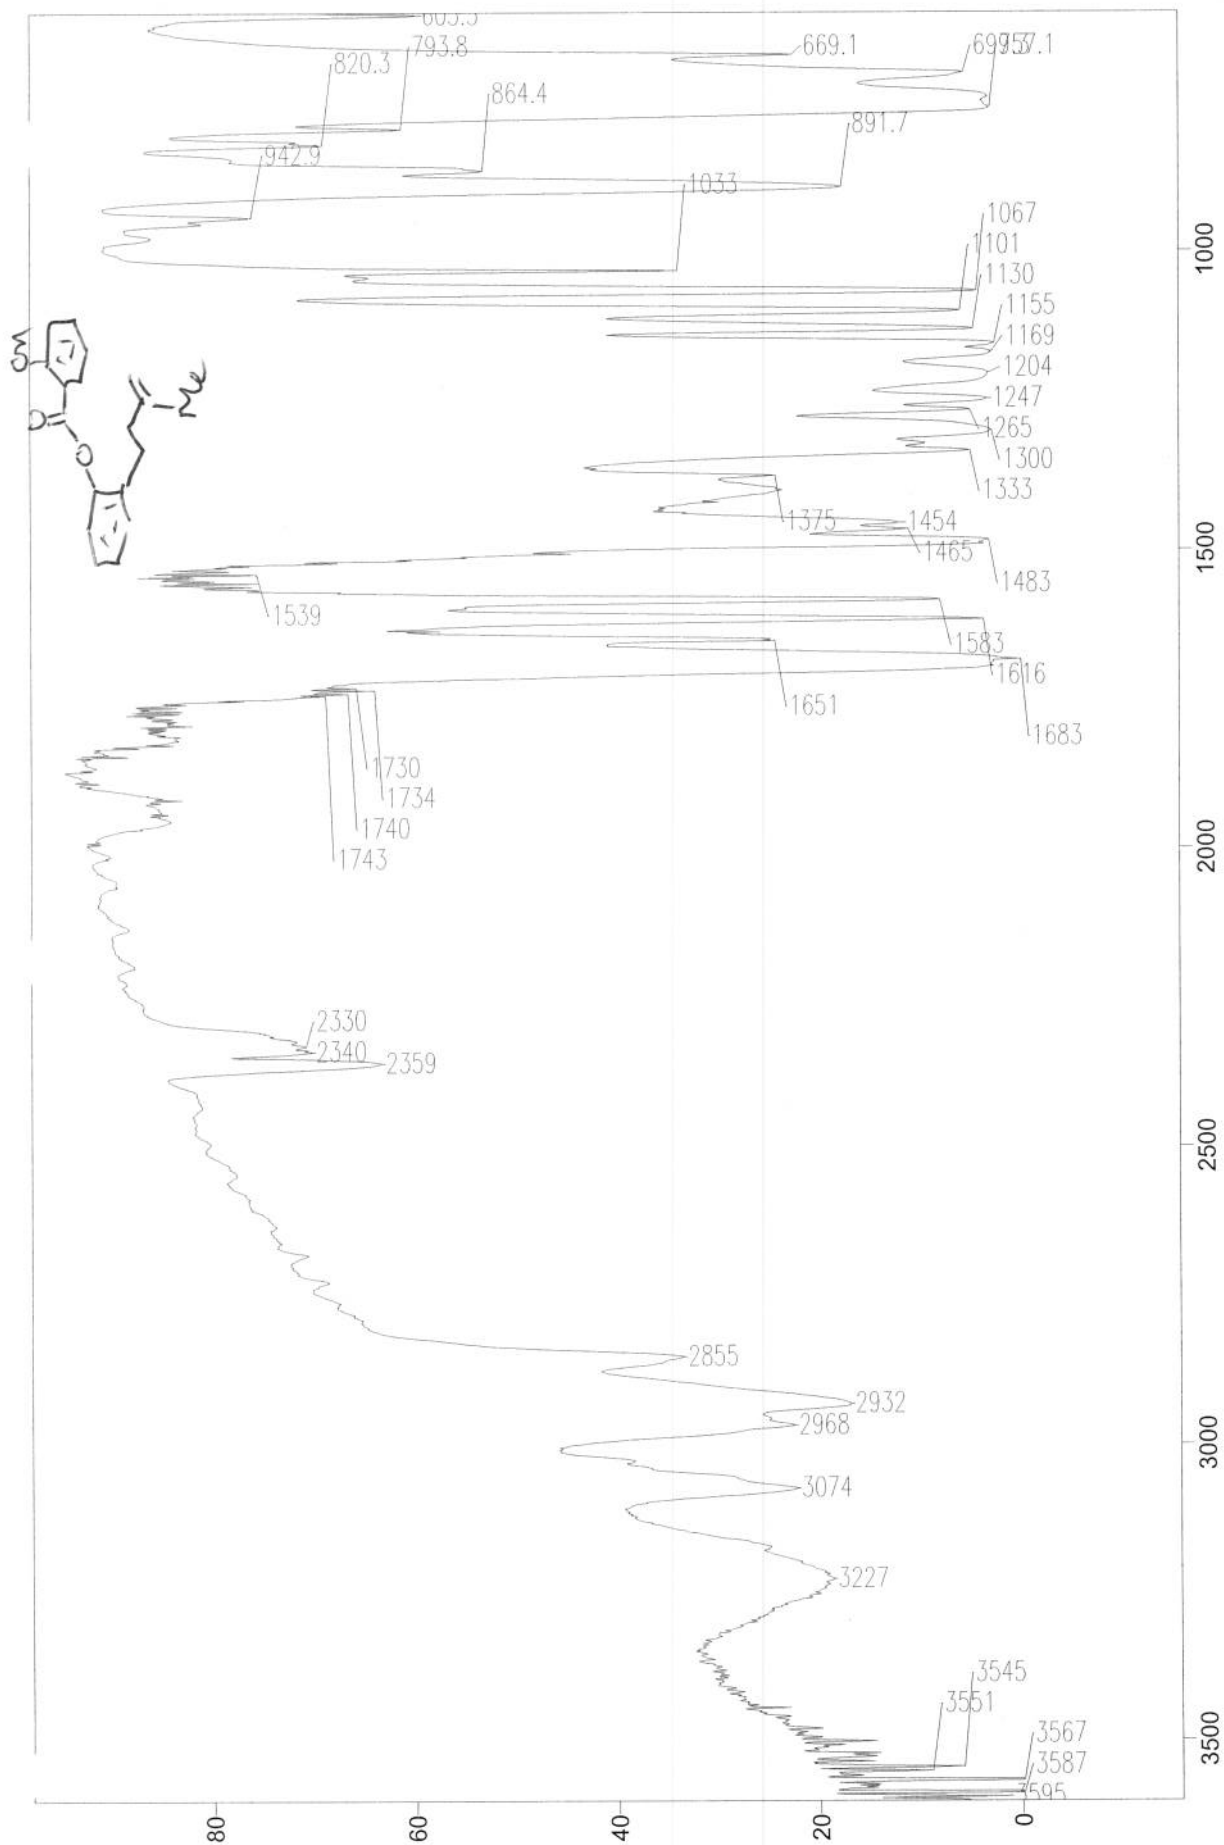

Transmission / Wavenumber (cm-1)

Paged X-Zoom CURSOR

File # 1 = HTG3-114-P

5/11/2012 3:23 PM Res=2 cm-1

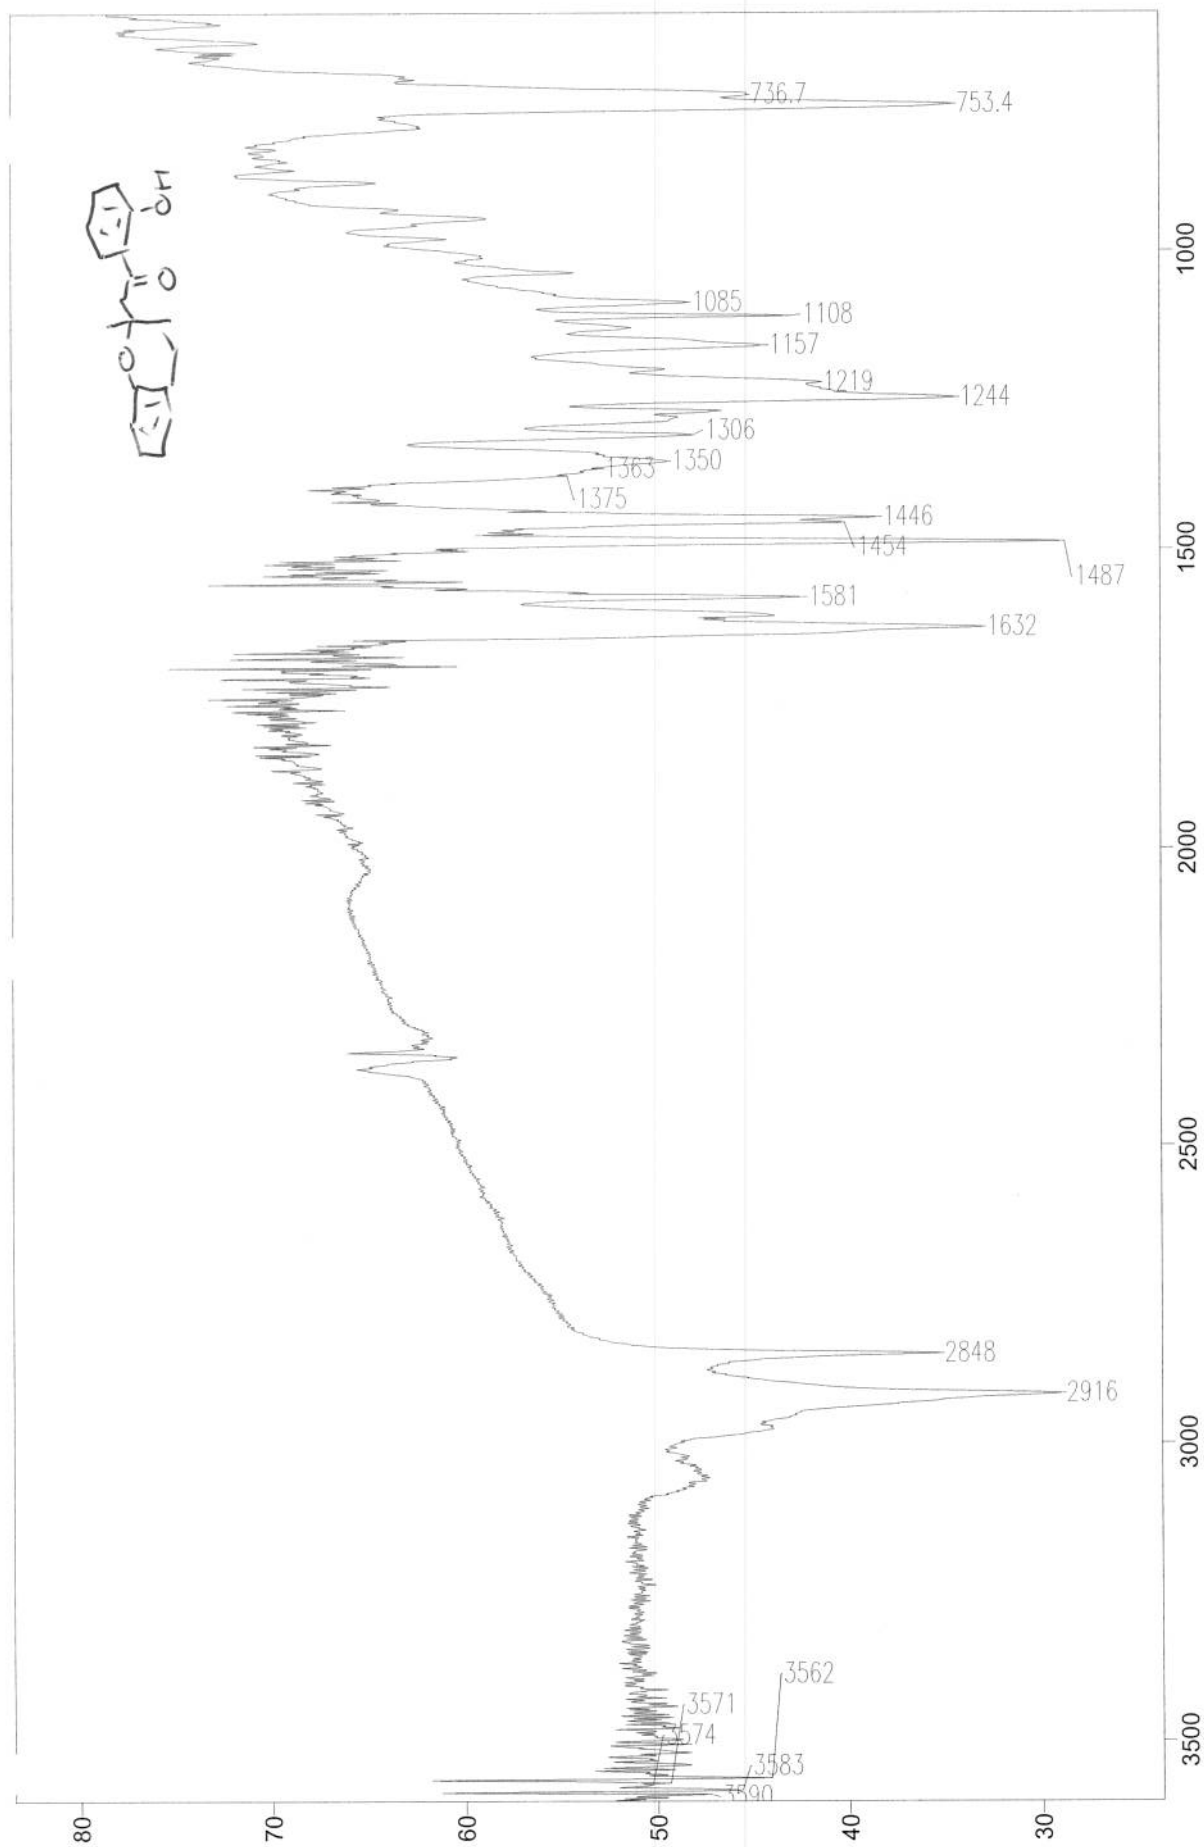

Transmission / Wavenumber (cm-1)

Paged X-Zoom CURSOR

File # 1 = HTG3-96-P2

5/11/2012 3:30 PM Res=2 cm-1

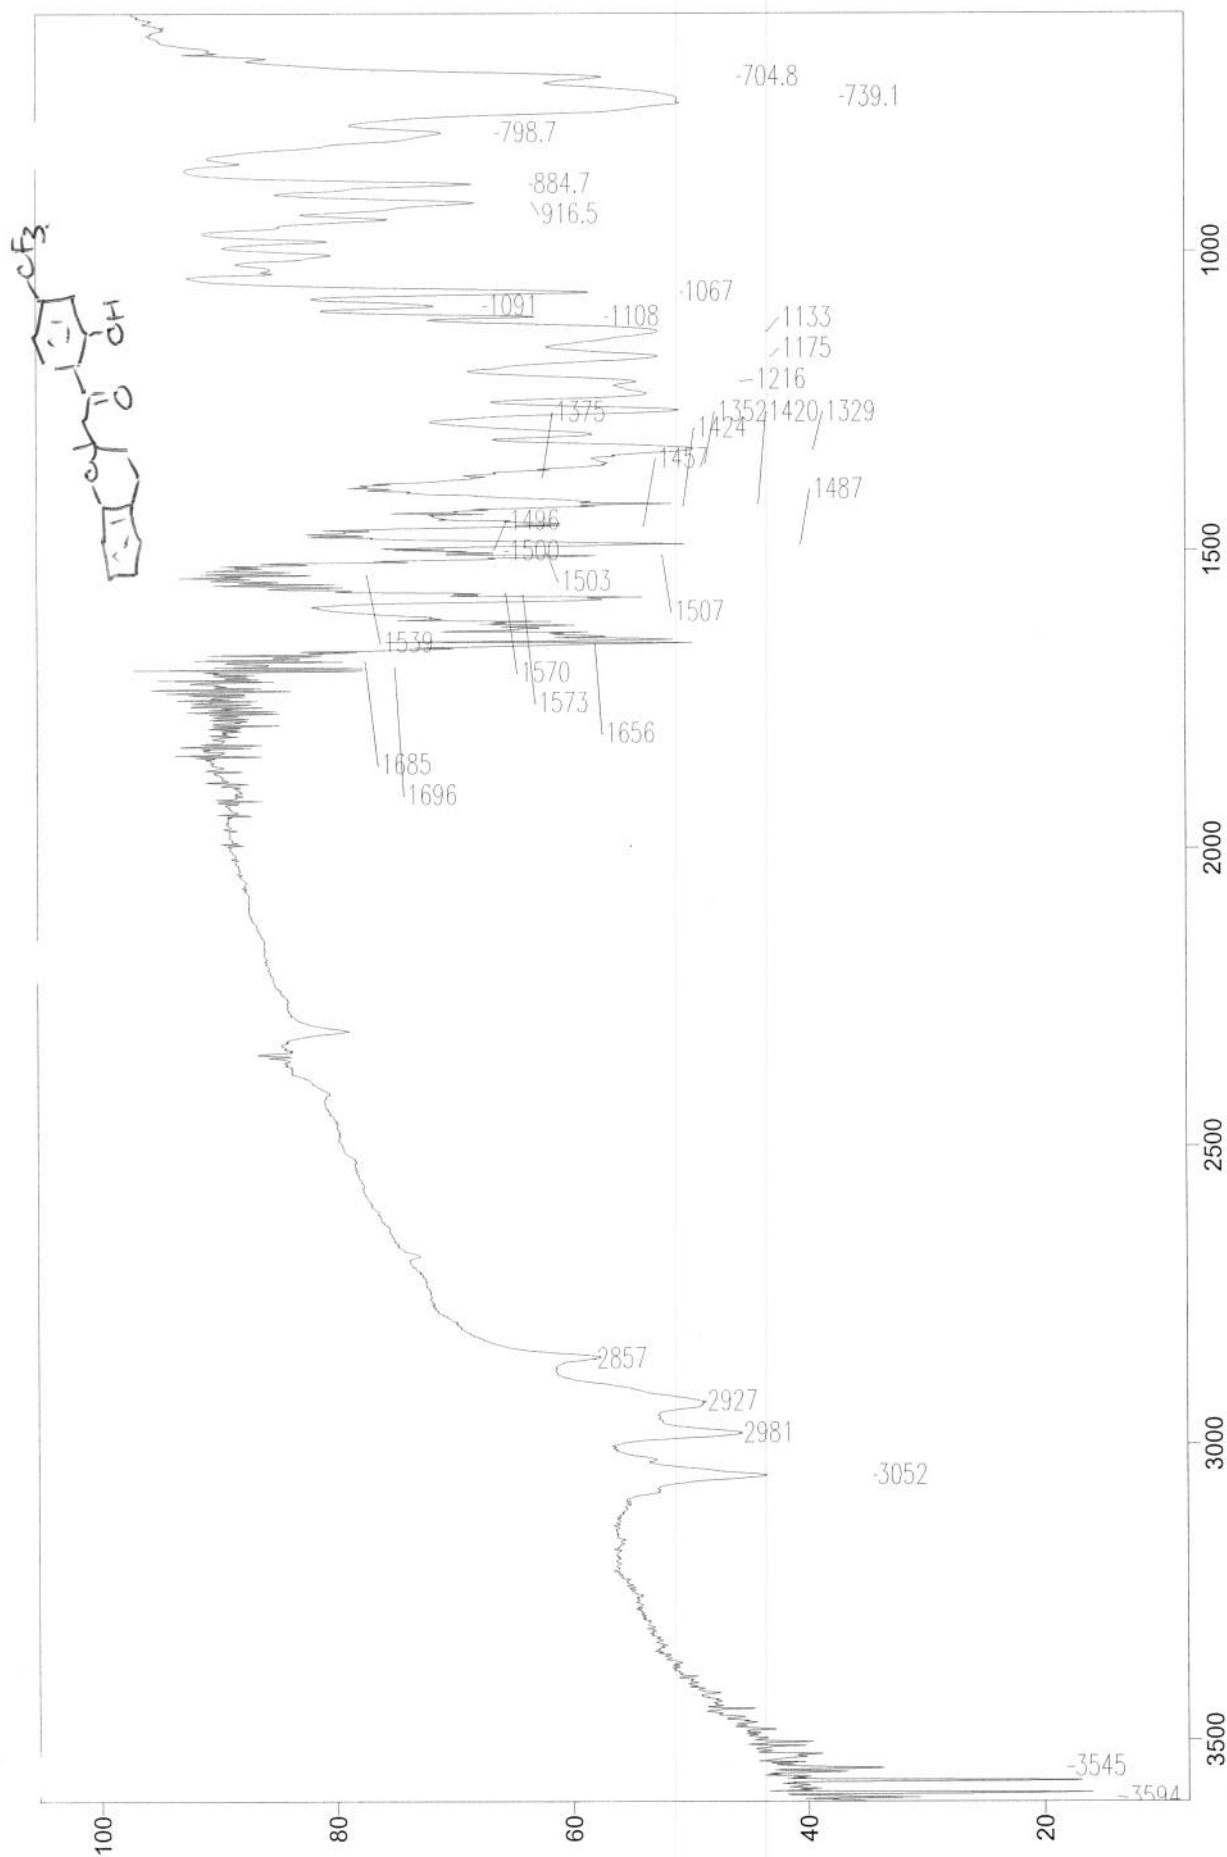

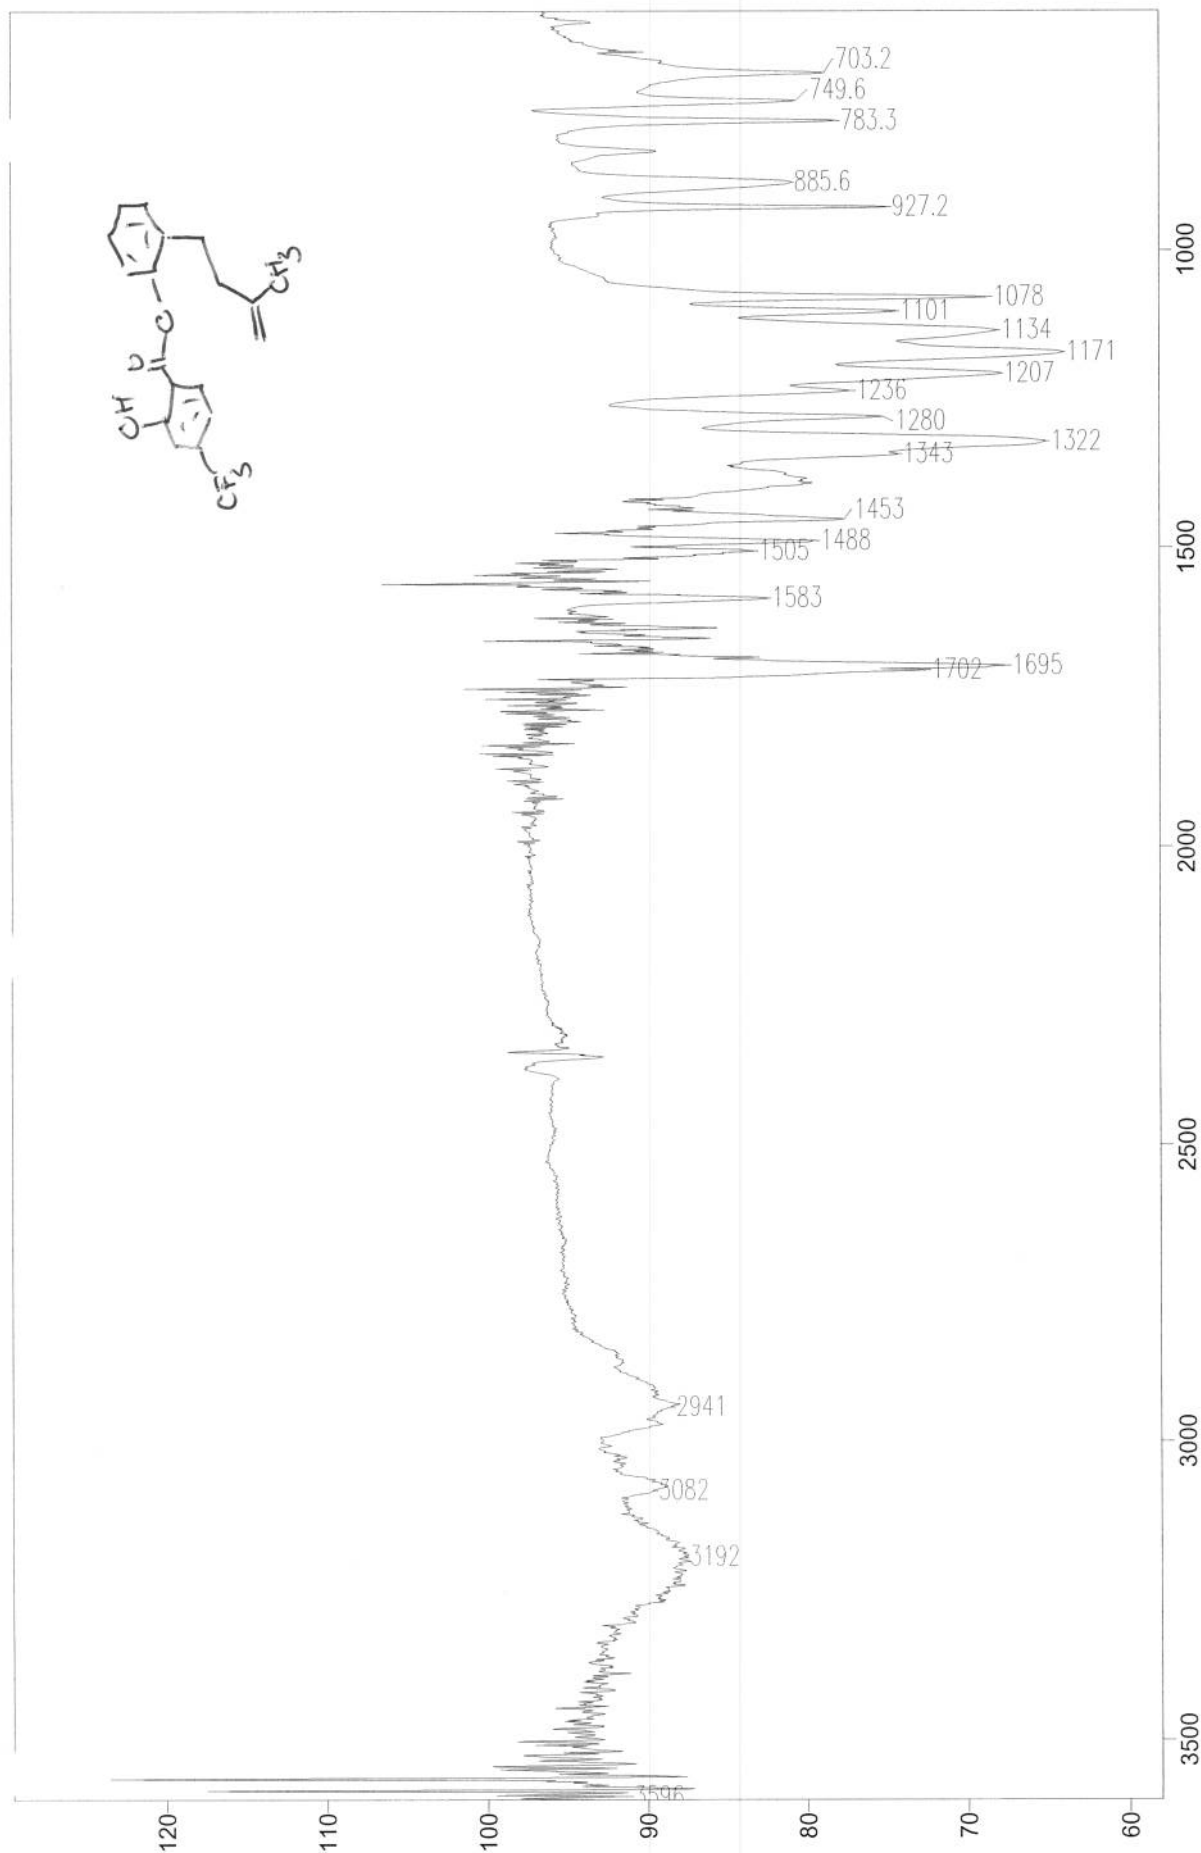

Transmission / Wavenumber (cm<sup>-1</sup>)

File # 1 = HTG3-189-P

starting material

Paged X-Zoom CURSOR

5/11/2012 3:05 PM Res=2 cm-1

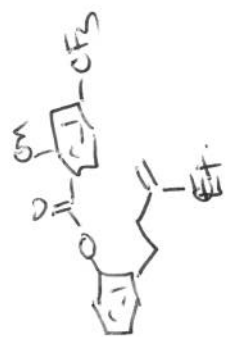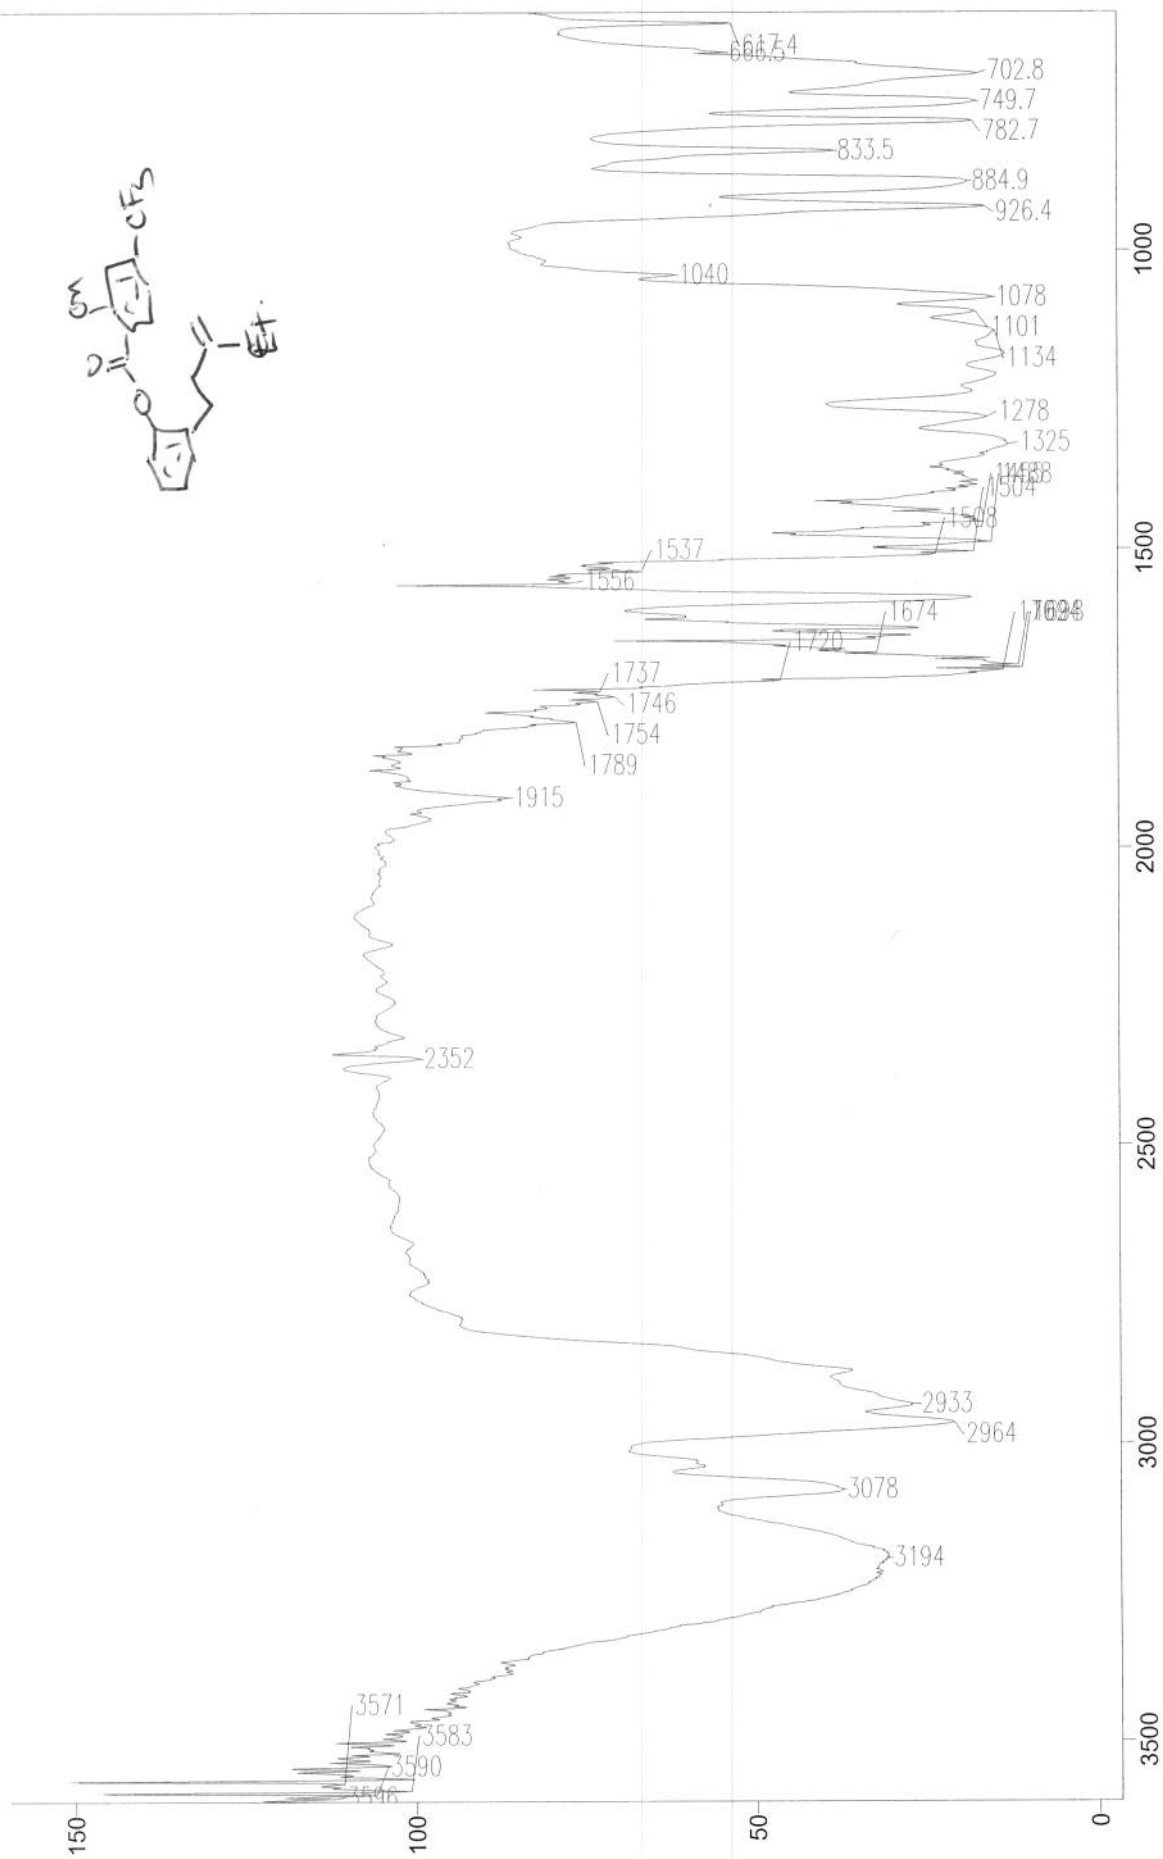

Transmission / Wavenumber (cm⁻¹)

File # 1 = HTG3-195P

Paged X-Zoom CURSOR

5/11/2012 3:59 PM Res=2 cm⁻¹



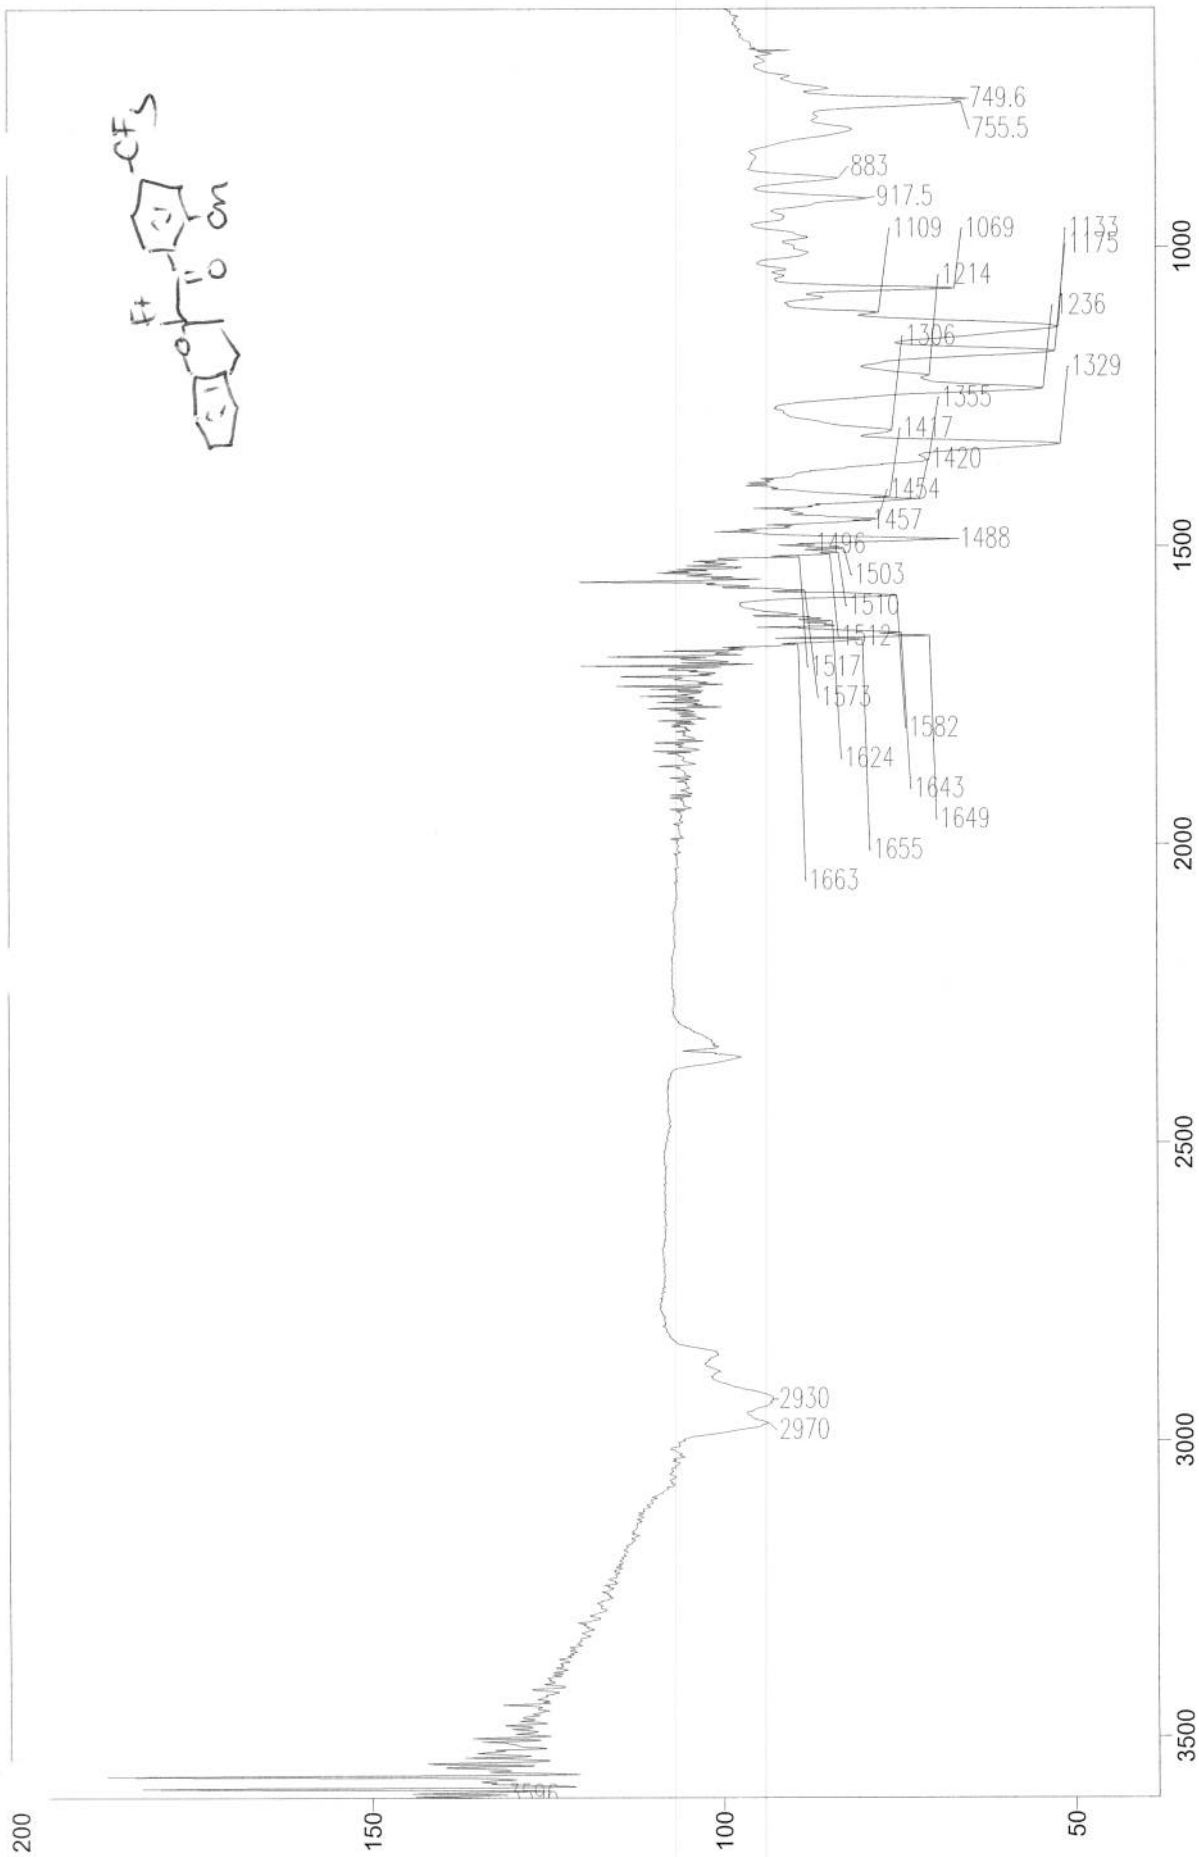

Transmission / Wavenumber (cm<sup>-1</sup>)

File # 1 = HTG3-197P

Paged X-Zoom CURSOR

5/11/2012 4:03 PM Res=2 cm-1

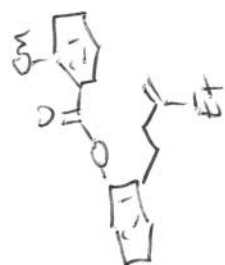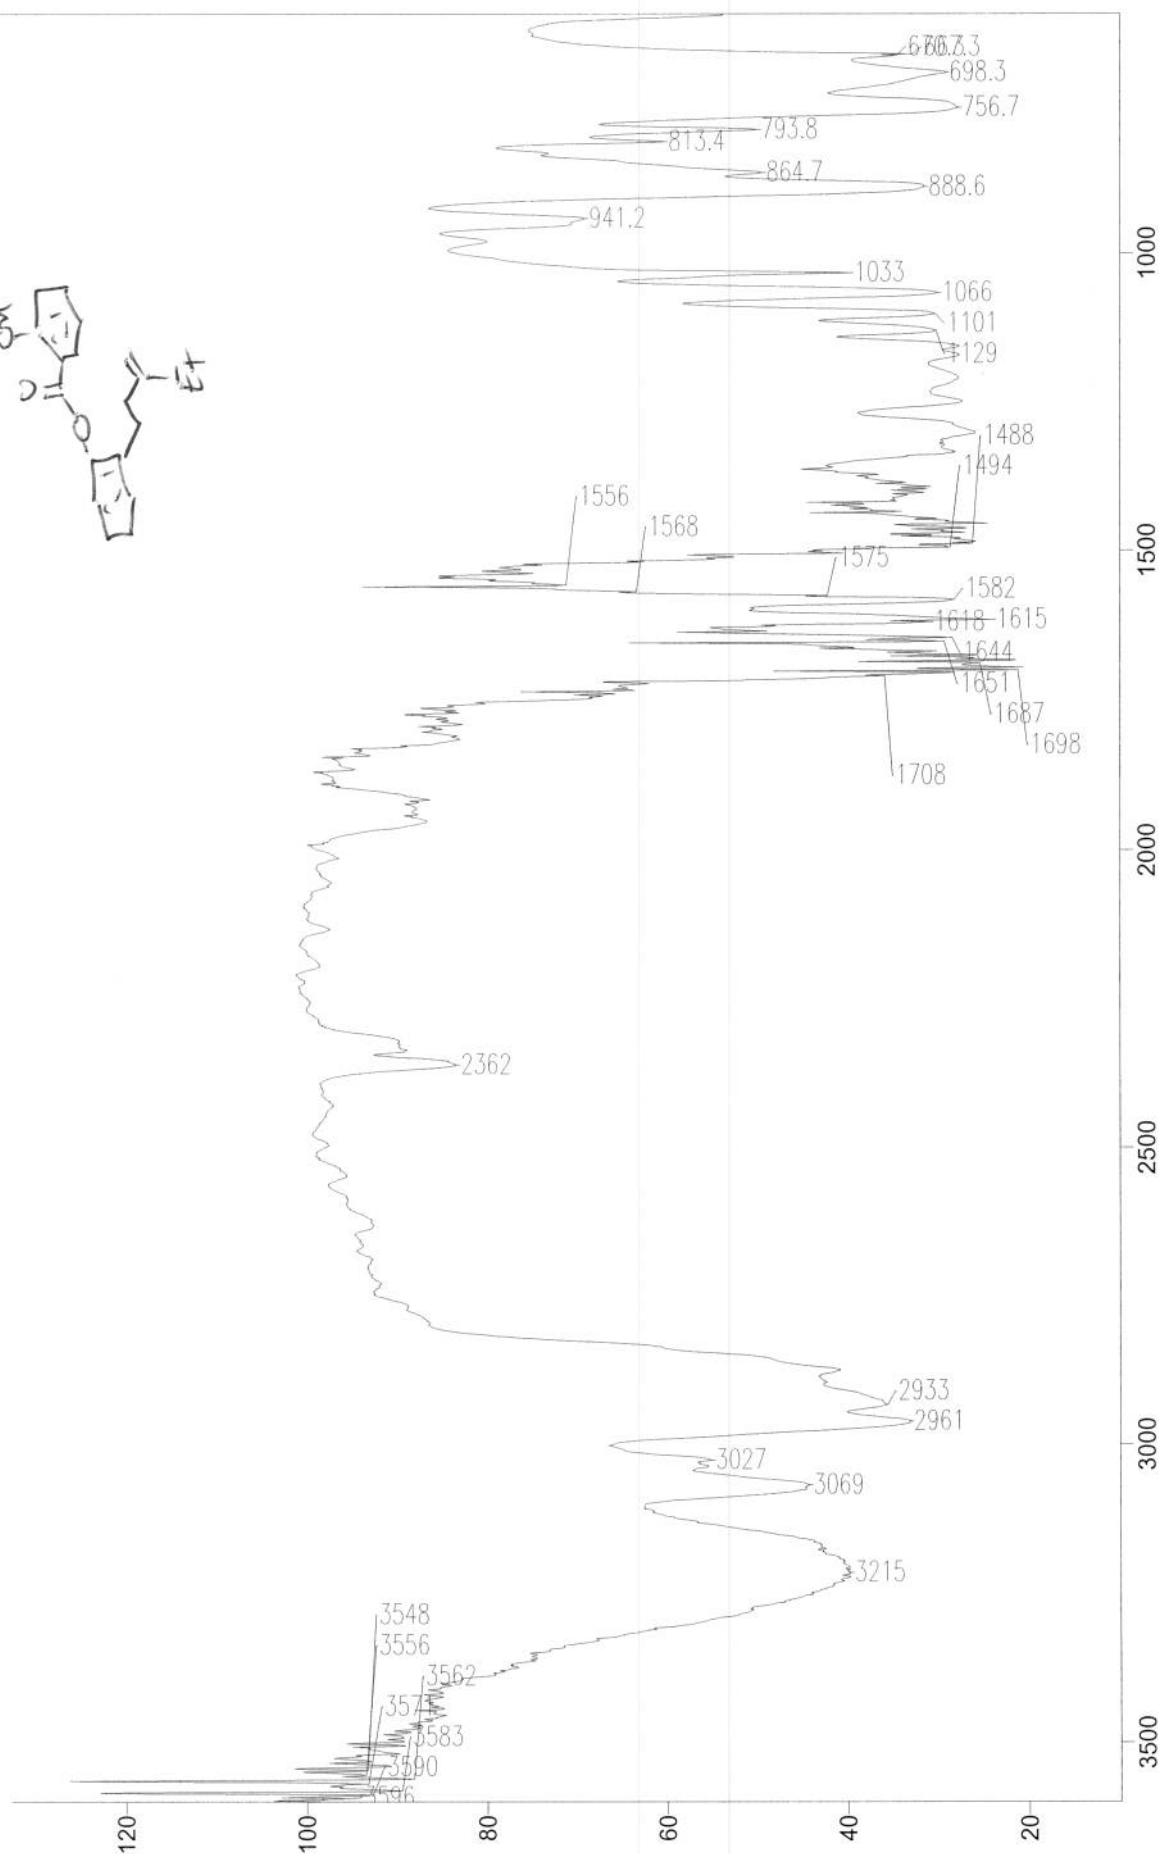

Transmission / Wavenumber (cm-1)

File # 1 = HTG3-154P2

Paged X-Zoom CURSOR

5/11/2012 3:54 PM Res=2 cm-1

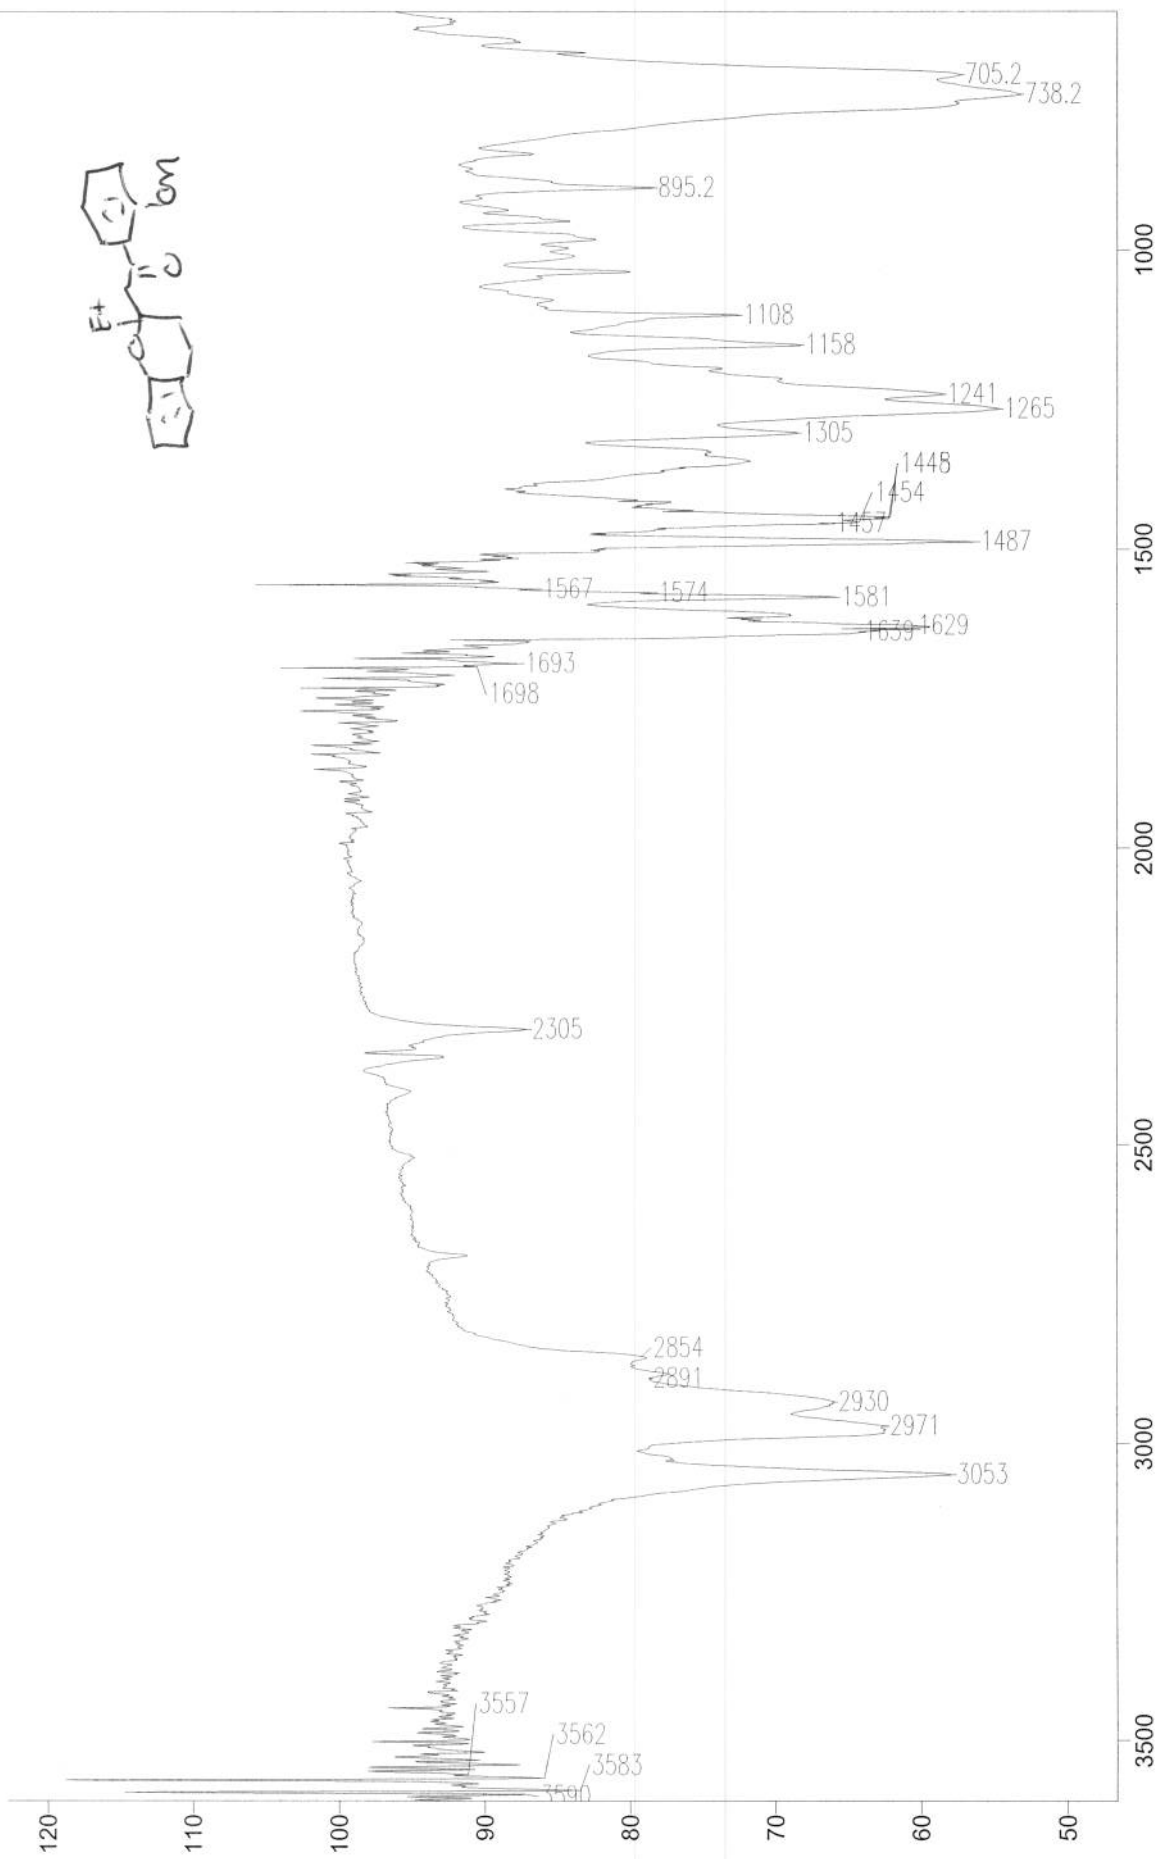

Transmission / Wavenumber (cm-1)

File # 1 = HTG3-188-P2

Paged X-Zoom CURSOR

5/11/2012 3:50 PM Res=2 cm-1
